# Supplementary material for: Chiral dirhodium catalysts derived from l-serine, l-threonine and l-cysteine: design, synthesis and application
Source: Royal Society of Chemistry journal article supplement (doi:10.1039/c5qo00110b), 2015-01-01
Supplement: c5qo00110b1.pdf [file c5qo00110b1.pdf]

## **Supporting Information**

### **Chiral dirhodium catalysts derived from L-serine, L-threonine and L-cysteine: Design, synthesis and application**

Jian Kang, Baofu Zhu, Jiewei Liu, Li Zhang,\* and Cheng-Yong Su\*

MOE Laboratory of Bioinorganic and Synthetic Chemistry, Lehn Institute of  
Functional Materials, School of Chemistry and Chemical Engineering, Sun Yat-sen  
University, Guangzhou 510275, China

## Table of Contents

|                                                                        |     |
|------------------------------------------------------------------------|-----|
| Figure S1a: $^1\text{H}$ NMR spectrum of <b>4S-NOSO</b> .....          | S1  |
| Figure S1b: $^{13}\text{C}$ NMR spectrum of <b>4S-NOSO</b> .....       | S1  |
| Figure S2a: $^1\text{H}$ NMR spectrum of <b>4S-FLSO</b> .....          | S2  |
| Figure S2b: $^{13}\text{C}$ NMR spectrum of <b>4S-FLSO</b> .....       | S2  |
| Figure S2c: $^{19}\text{F}$ NMR spectrum of <b>4S-FLSO</b> .....       | S3  |
| Figure S3a: $^1\text{H}$ NMR spectrum of <b>4S-TFSO</b> .....          | S4  |
| Figure S3b: $^{13}\text{C}$ NMR spectrum of <b>4S-TFSO</b> .....       | S4  |
| Figure S3c: $^{19}\text{F}$ NMR spectrum of <b>4S-TFSO</b> .....       | S5  |
| Figure S3d: DEPT 90 NMR spectrum of <b>4S-TFSO</b> .....               | S5  |
| Figure S4a: $^1\text{H}$ NMR spectrum of <b>4S-MESO</b> .....          | S6  |
| Figure S4b: $^{13}\text{C}$ NMR spectrum of <b>4S-MESO</b> .....       | S6  |
| Figure S5a: $^1\text{H}$ NMR spectrum of <b>4S-TBSO</b> .....          | S7  |
| Figure S5b: $^{13}\text{C}$ NMR spectrum of <b>4S-TBSO</b> .....       | S7  |
| Figure S6a: $^1\text{H}$ NMR spectrum of <b>4S-MOSO</b> .....          | S8  |
| Figure S6b: $^{13}\text{C}$ NMR spectrum of <b>4S-MOSO</b> .....       | S8  |
| Figure S7a: $^1\text{H}$ NMR spectrum of <b>4S-DOSO</b> .....          | S9  |
| Figure S8a: $^1\text{H}$ NMR spectrum of <b>4S,5R-MNOSO</b> .....      | S10 |
| Figure S8b: $^{13}\text{C}$ NMR spectrum of <b>4S,5R-MNOSO</b> .....   | S10 |
| Figure S9a: $^1\text{H}$ NMR spectrum of <b>4S,5R-MFLSO</b> .....      | S11 |
| Figure S9b: $^{13}\text{C}$ NMR spectrum of <b>4S,5R-MFLSO</b> .....   | S11 |
| Figure S9c: $^{19}\text{F}$ NMR spectrum of <b>4S,5R-MFLSO</b> .....   | S12 |
| Figure S10a: $^1\text{H}$ NMR spectrum of <b>4S,5R-MTFSO</b> .....     | S13 |
| Figure S10b: $^{13}\text{C}$ NMR spectrum of <b>4S,5R-MTFLSO</b> ..... | S13 |
| Figure S10c: $^{19}\text{F}$ NMR spectrum of <b>4S,5R-MTFSO</b> .....  | S14 |
| Figure S11a: $^1\text{H}$ NMR spectrum of <b>4S,5R-MMESO</b> .....     | S15 |
| Figure S11b: $^{13}\text{C}$ NMR spectrum of <b>4S,5R-MMESO</b> .....  | S15 |
| Figure S12a: $^1\text{H}$ NMR spectrum of <b>4S,5R-MTBSO</b> .....     | S16 |

|                                                                                                                                           |     |
|-------------------------------------------------------------------------------------------------------------------------------------------|-----|
| Figure S12b: $^{13}\text{C}$ NMR spectrum of <b>4<i>S</i>,5<i>R</i>-MTBSO</b> .....                                                       | S16 |
| Figure S13a: $^1\text{H}$ NMR spectrum of <b>4<i>S</i>,5<i>R</i>-MMOSO</b> .....                                                          | S17 |
| Figure S13b: $^{13}\text{C}$ NMR spectrum of <b>4<i>S</i>,5<i>R</i>-MMOSO</b> .....                                                       | S17 |
| Figure S14a: $^1\text{H}$ NMR spectrum of <b>4<i>S</i>,5<i>R</i>-MDOSO</b> .....                                                          | S18 |
| Figure S15a: $^1\text{H}$ NMR spectrum of <b>(4<i>R</i>)-3-((4-nitrophenyl)sulfonyl)thiazolidine-4-carboxylic acid</b> .....              | S19 |
| Figure S16a: $^1\text{H}$ NMR spectrum of <b>(4<i>R</i>)-3-((4-fluorophenyl)sulfonyl)thiazolidine-4-carboxylic acid</b> .....             | S20 |
| Figure S16b: $^{19}\text{F}$ NMR spectrum of <b>(4<i>R</i>)-3-((4-fluorophenyl)sulfonyl)thiazolidine-4-carboxylic acid</b> .....          | S20 |
| Figure S17a: $^1\text{H}$ NMR spectrum of <b>(4<i>R</i>)-3-((4-trifluorophenyl)sulfonyl)thiazolidine-4-carboxylic acid</b> .....          | S21 |
| Figure S17b: $^{19}\text{F}$ NMR spectrum of <b>(4<i>R</i>)-3-((4-trifluorophenyl)sulfonyl)thiazolidine-4-carboxylic acid</b> .....       | S21 |
| Figure S18a: $^1\text{H}$ NMR spectrum of <b>(4<i>R</i>)-3-tosylthiazolidine-4-carboxylic acid</b> .....                                  | S22 |
| Figure S19a: $^1\text{H}$ NMR spectrum of <b>(4<i>R</i>)-3-((4-<i>tert</i>-butyl)phenyl)sulfonyl)thiazolidine-4-carboxylic acid</b> ..... | S23 |
| Figure S20a: $^1\text{H}$ NMR spectrum of <b>(4<i>R</i>)-3-((4-methoxyphenyl)sulfonyl)thiazolidine-4-carboxylic acid</b> .....            | S24 |
| Figure S21a: $^1\text{H}$ NMR spectrum of <b>(4<i>R</i>)-3-((4-<i>n</i>-dodecylphenyl)sulfonyl)thiazolidine-4-carboxylic acid</b> .....   | S25 |
| Figure S22a: $^1\text{H}$ NMR spectrum of <b>4<i>R</i>-NOST</b> .....                                                                     | S26 |
| Figure S22b: $^{13}\text{C}$ NMR spectrum of <b>4<i>R</i>-NOST</b> .....                                                                  | S26 |
| Figure S23a: $^1\text{H}$ NMR spectrum of <b>4<i>R</i>-FLST</b> .....                                                                     | S27 |
| Figure S23b: $^{13}\text{C}$ NMR spectrum of <b>4<i>R</i>-FLST</b> .....                                                                  | S27 |
| Figure S23c: $^{19}\text{F}$ NMR spectrum of <b>4<i>R</i>-FLST</b> .....                                                                  | S28 |
| Figure S24a: $^1\text{H}$ NMR spectrum of <b>4<i>R</i>-TFST</b> .....                                                                     | S29 |
| Figure S24b: $^{13}\text{C}$ NMR spectrum of <b>4<i>R</i>-TFST</b> .....                                                                  | S29 |
| Figure S24c: $^{19}\text{F}$ NMR spectrum of <b>4<i>R</i>-TFST</b> .....                                                                  | S30 |
| Figure S24d: DEPT 90 NMR spectrum of <b>4<i>R</i>-FLST</b> .....                                                                          | S30 |
| Figure S25a: $^1\text{H}$ NMR spectrum of <b>4<i>R</i>-MEST</b> .....                                                                     | S31 |

|                                                                                                   |     |
|---------------------------------------------------------------------------------------------------|-----|
| Figure S25b: $^{13}\text{C}$ NMR spectrum of <b>4R-MEST</b> .....                                 | S31 |
| Figure S26a: $^1\text{H}$ NMR spectrum of <b>4R-TBST</b> .....                                    | S32 |
| Figure S26b: $^{13}\text{C}$ NMR spectrum of <b>4R-TBST</b> .....                                 | S32 |
| Figure S27a: $^1\text{H}$ NMR spectrum of <b>4R-MOST</b> .....                                    | S33 |
| Figure S27b: $^{13}\text{C}$ NMR spectrum of <b>4R-MOST</b> .....                                 | S33 |
| Figure S28a: $^1\text{H}$ NMR spectrum of <b>4R-DOST</b> .....                                    | S34 |
| Figure S29a: $^1\text{H}$ NMR spectrum of <b>Rh<sub>2</sub>(4S-NOSO)<sub>4</sub></b> .....        | S35 |
| Figure S29b: $^{13}\text{C}$ NMR spectrum of <b>Rh<sub>2</sub>(4S-NOSO)<sub>4</sub></b> .....     | S35 |
| Figure S30a: $^1\text{H}$ NMR spectrum of <b>Rh<sub>2</sub>(4S-FLSO)<sub>4</sub></b> .....        | S36 |
| Figure S30b: $^{13}\text{C}$ NMR spectrum of <b>Rh<sub>2</sub>(4S-FLSO)<sub>4</sub></b> .....     | S36 |
| Figure S30c: $^{19}\text{F}$ NMR spectrum of <b>Rh<sub>2</sub>(4S-FLSO)<sub>4</sub></b> .....     | S37 |
| Figure S31a: $^1\text{H}$ NMR spectrum of <b>Rh<sub>2</sub>(4S-TFSO)<sub>4</sub></b> .....        | S38 |
| Figure S31b: $^{13}\text{C}$ NMR spectrum of <b>Rh<sub>2</sub>(4S-TFSO)<sub>4</sub></b> .....     | S38 |
| Figure S31c: $^{19}\text{F}$ NMR spectrum of <b>Rh<sub>2</sub>(4S-TFSO)<sub>4</sub></b> .....     | S39 |
| Figure S32a: $^1\text{H}$ NMR spectrum of <b>Rh<sub>2</sub>(4S-MESO)<sub>4</sub></b> .....        | S40 |
| Figure S32b: $^{13}\text{C}$ NMR spectrum of <b>Rh<sub>2</sub>(4S-MESO)<sub>4</sub></b> .....     | S40 |
| Figure S33a: $^1\text{H}$ NMR spectrum of <b>Rh<sub>2</sub>(4S-TBSO)<sub>4</sub></b> .....        | S41 |
| Figure S33b: $^{13}\text{C}$ NMR spectrum of <b>Rh<sub>2</sub>(4S-TBSO)<sub>4</sub></b> .....     | S41 |
| Figure S34a: $^1\text{H}$ NMR spectrum of <b>Rh<sub>2</sub>(4S-MOSO)<sub>4</sub></b> .....        | S42 |
| Figure S34b: $^{13}\text{C}$ NMR spectrum of <b>Rh<sub>2</sub>(4S-MOSO)<sub>4</sub></b> .....     | S42 |
| Figure S35a: $^1\text{H}$ NMR spectrum of <b>Rh<sub>2</sub>(4S-DOSO)<sub>4</sub></b> .....        | S43 |
| Figure S36a: $^1\text{H}$ NMR spectrum of <b>Rh<sub>2</sub>(4S,5R-MNOSO)<sub>4</sub></b> .....    | S44 |
| Figure S36b: $^{13}\text{C}$ NMR spectrum of <b>Rh<sub>2</sub>(4S,5R-MNOSO)<sub>4</sub></b> ..... | S44 |
| Figure S37a: $^1\text{H}$ NMR spectrum of <b>Rh<sub>2</sub>(4S,5R-MFLSO)<sub>4</sub></b> .....    | S45 |
| Figure S37b: $^{13}\text{C}$ NMR spectrum of <b>Rh<sub>2</sub>(4S,5R-MFLSO)<sub>4</sub></b> ..... | S45 |
| Figure S37c: $^{19}\text{F}$ NMR spectrum of <b>Rh<sub>2</sub>(4S,5R-MFLSO)<sub>4</sub></b> ..... | S46 |
| Figure S38a: $^1\text{H}$ NMR spectrum of <b>Rh<sub>2</sub>(4S,5R-MTFSO)<sub>4</sub></b> .....    | S47 |
| Figure S38b: $^{13}\text{C}$ NMR spectrum of <b>Rh<sub>2</sub>(4S,5R-MTFSO)<sub>4</sub></b> ..... | S47 |
| Figure S38c: $^{19}\text{F}$ NMR spectrum of <b>Rh<sub>2</sub>(4S,5R-MTFSO)<sub>4</sub></b> ..... | S48 |

|                                                                                        |     |
|----------------------------------------------------------------------------------------|-----|
| Figure S39a: $^1\text{H}$ NMR spectrum of $\text{Rh}_2(4S,5R\text{-MMESO})_4$ .....    | S49 |
| Figure S39b: $^{13}\text{C}$ NMR spectrum of $\text{Rh}_2(4S,5R\text{-MMESO})_4$ ..... | S49 |
| Figure S40a: $^1\text{H}$ NMR spectrum of $\text{Rh}_2(4S,5R\text{-MTBSO})_4$ .....    | S50 |
| Figure S40b: $^{13}\text{C}$ NMR spectrum of $\text{Rh}_2(4S,5R\text{-MTBSO})_4$ ..... | S50 |
| Figure S41a: $^1\text{H}$ NMR spectrum of $\text{Rh}_2(4S,5R\text{-MMOSO})_4$ .....    | S51 |
| Figure S41b: $^{13}\text{C}$ NMR spectrum of $\text{Rh}_2(4S,5R\text{-MMOSO})_4$ ..... | S51 |
| Figure S42a: $^1\text{H}$ NMR spectrum of $\text{Rh}_2(4S,5R\text{-MMOSO})_4$ .....    | S52 |
| Figure S43a: $^1\text{H}$ NMR spectrum of $\text{Rh}_2(4R\text{-NOST})_4$ .....        | S53 |
| Figure S43b: $^{13}\text{C}$ NMR spectrum of $\text{Rh}_2(4R\text{-NOST})_4$ .....     | S53 |
| Figure S44a: $^1\text{H}$ NMR spectrum of $\text{Rh}_2(4R\text{-FLST})_4$ .....        | S54 |
| Figure S44b: $^{13}\text{C}$ NMR spectrum of $\text{Rh}_2(4R\text{-FLST})_4$ .....     | S54 |
| Figure S44c: $^{19}\text{F}$ NMR spectrum of $\text{Rh}_2(4R\text{-FLST})_4$ .....     | S55 |
| Figure S45a: $^1\text{H}$ NMR spectrum of $\text{Rh}_2(4R\text{-TFST})_4$ .....        | S56 |
| Figure S45b: $^{13}\text{C}$ NMR spectrum of $\text{Rh}_2(4R\text{-TFST})_4$ .....     | S56 |
| Figure S45c: $^{19}\text{F}$ NMR spectrum of $\text{Rh}_2(4R\text{-TFST})_4$ .....     | S57 |
| Figure S46a: $^1\text{H}$ NMR spectrum of $\text{Rh}_2(4R\text{-MEST})_4$ .....        | S58 |
| Figure S46b: $^{13}\text{C}$ NMR spectrum of $\text{Rh}_2(4R\text{-MEST})_4$ .....     | S58 |
| Figure S47a: $^1\text{H}$ NMR spectrum of $\text{Rh}_2(4R\text{-TBST})_4$ .....        | S59 |
| Figure S47b: $^{13}\text{C}$ NMR spectrum of $\text{Rh}_2(4R\text{-TBST})_4$ .....     | S59 |
| Figure S48a: $^1\text{H}$ NMR spectrum of $\text{Rh}_2(4R\text{-MOST})_4$ .....        | S60 |
| Figure S48b: $^{13}\text{C}$ NMR spectrum of $\text{Rh}_2(4R\text{-MOST})_4$ .....     | S60 |
| Figure S49a: $^1\text{H}$ NMR spectrum of $\text{Rh}_2(4R\text{-DOST})_4$ .....        | S61 |
| NMR spectrum of the obtained products .....                                            | S62 |
| Chiral HPLC traces .....                                                               | S73 |
| X-ray crystallography data .....                                                       | S79 |

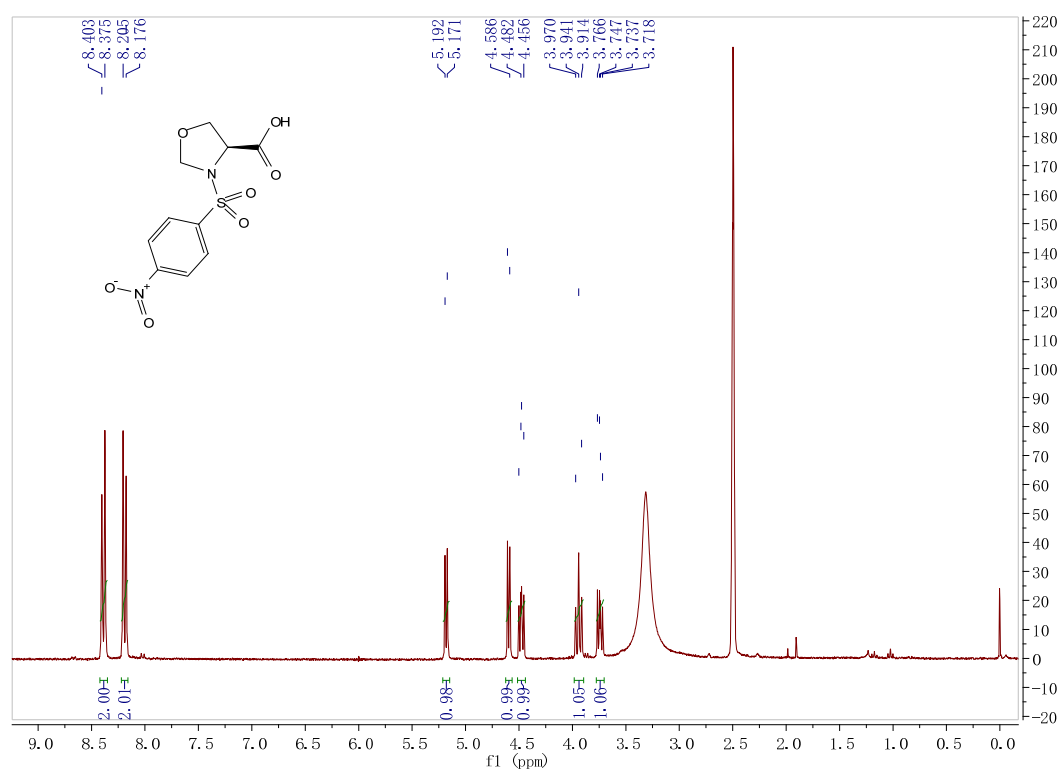

**Figure S1s:** <sup>1</sup>H NMR (300 MHz, DMSO-d<sub>6</sub>) spectrum of 4S-NOSO

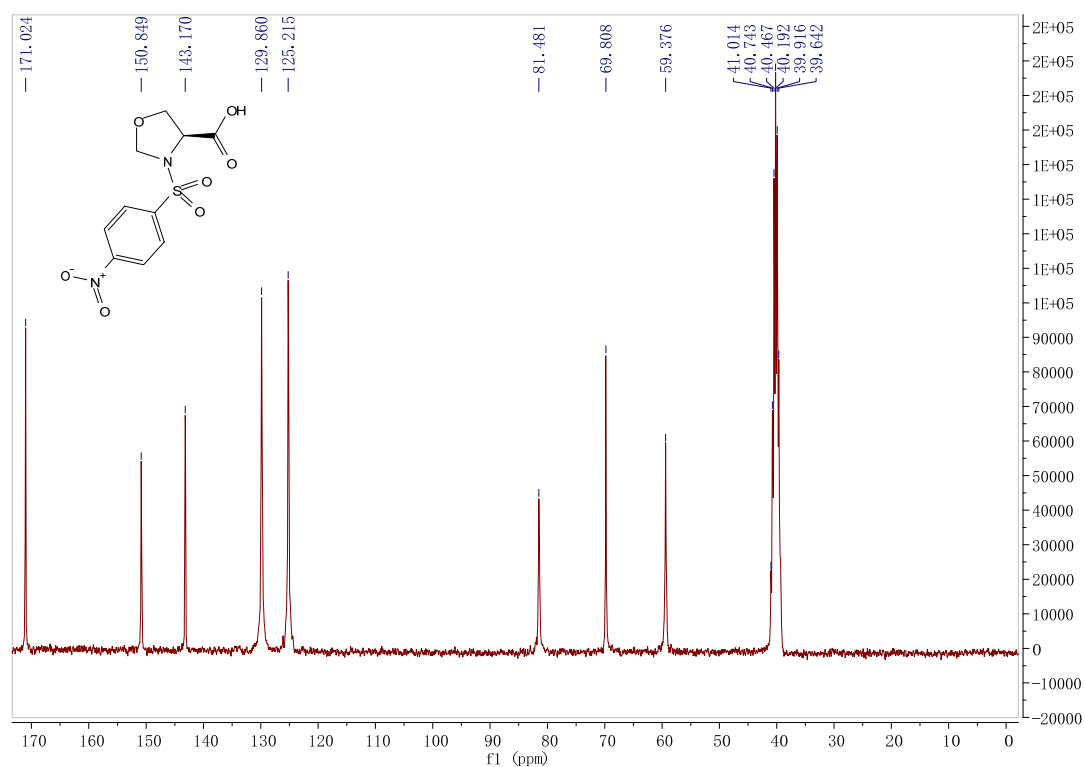

**Figure S1b:** <sup>13</sup>C NMR (75 MHz, DMSO-d<sub>6</sub>) spectrum of 4S-NOSO

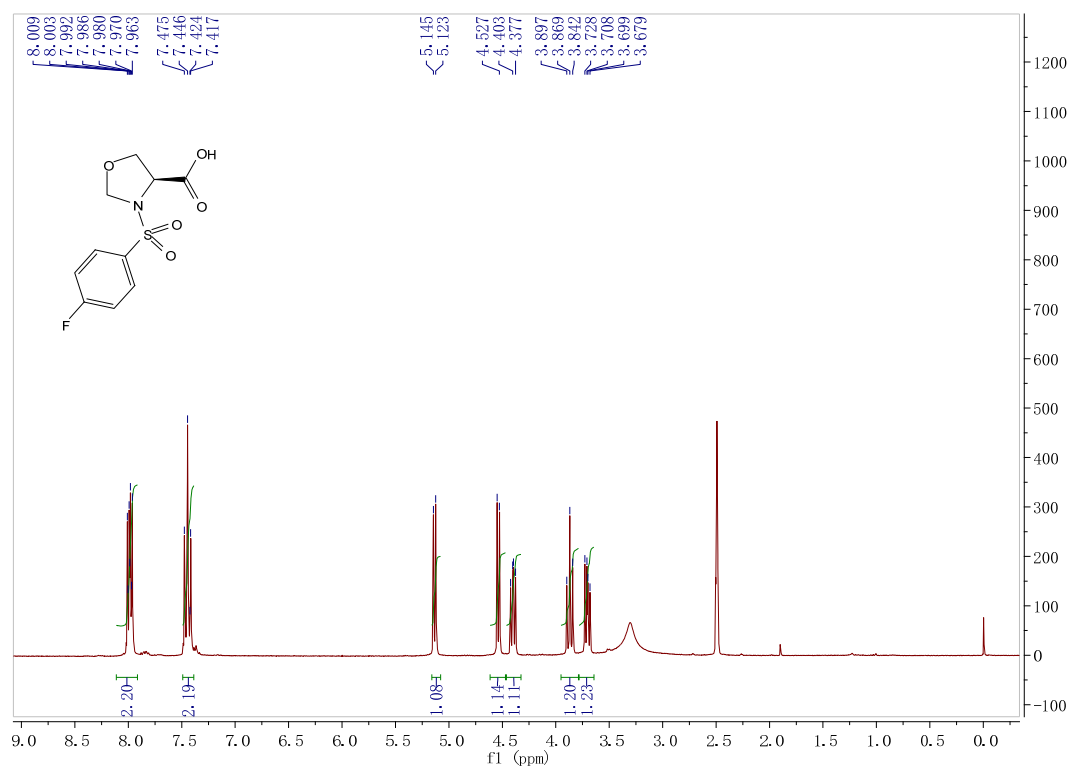

**Figure S2a:** <sup>1</sup>H NMR (300 MHz, DMSO-d<sub>6</sub>) spectrum of 4S-FLSO

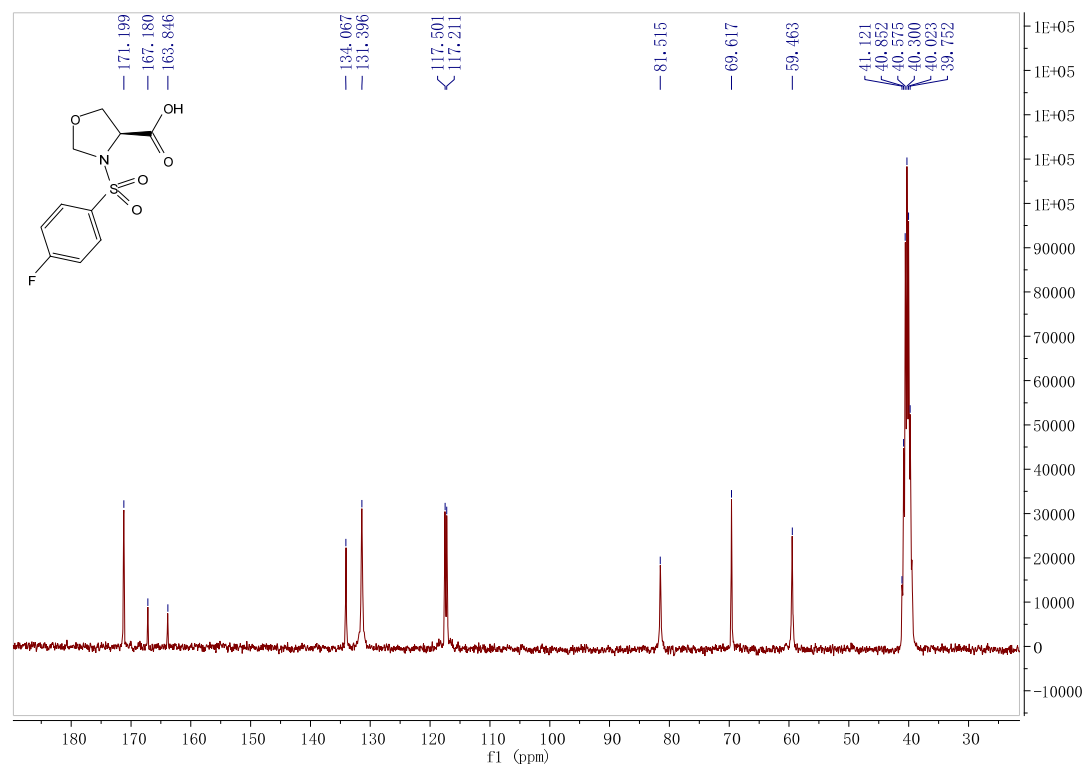

**Figure S2b:** <sup>13</sup>C NMR (75 MHz, DMSO-d<sub>6</sub>) spectrum of 4S-FLSO

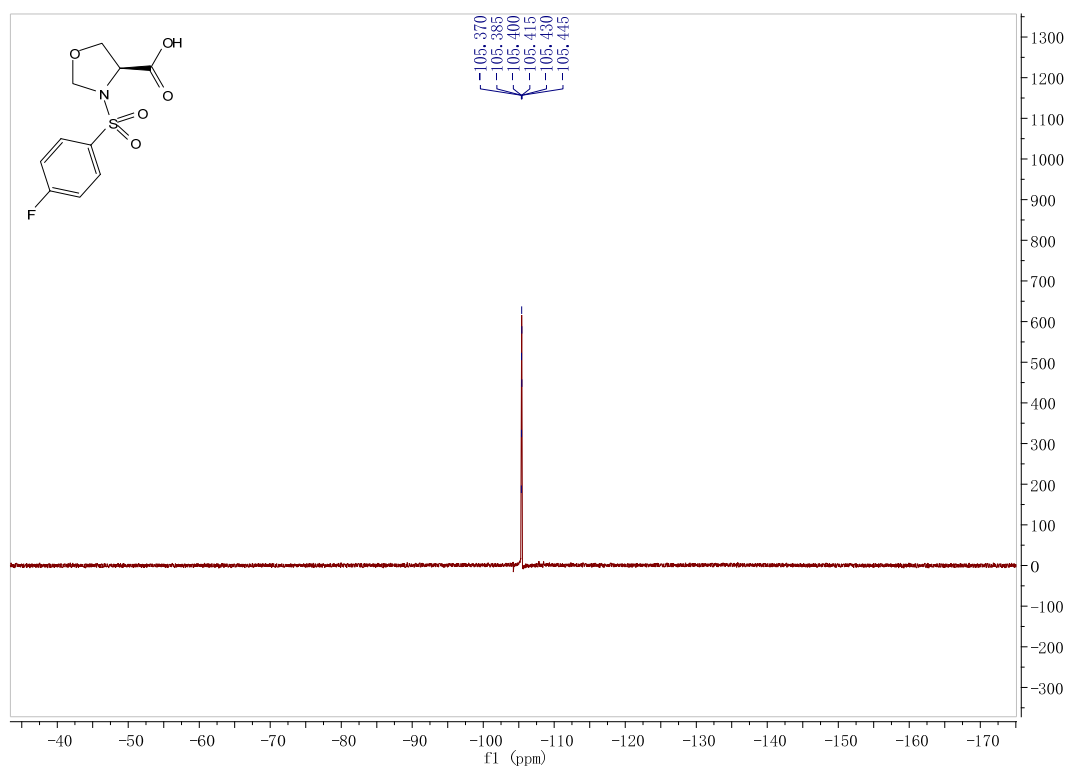

**Figure S2c:**  $^{19}\text{F}$  NMR (282 MHz, DMSO- $\text{d}_6$ ) spectrum of 4S-FLSO

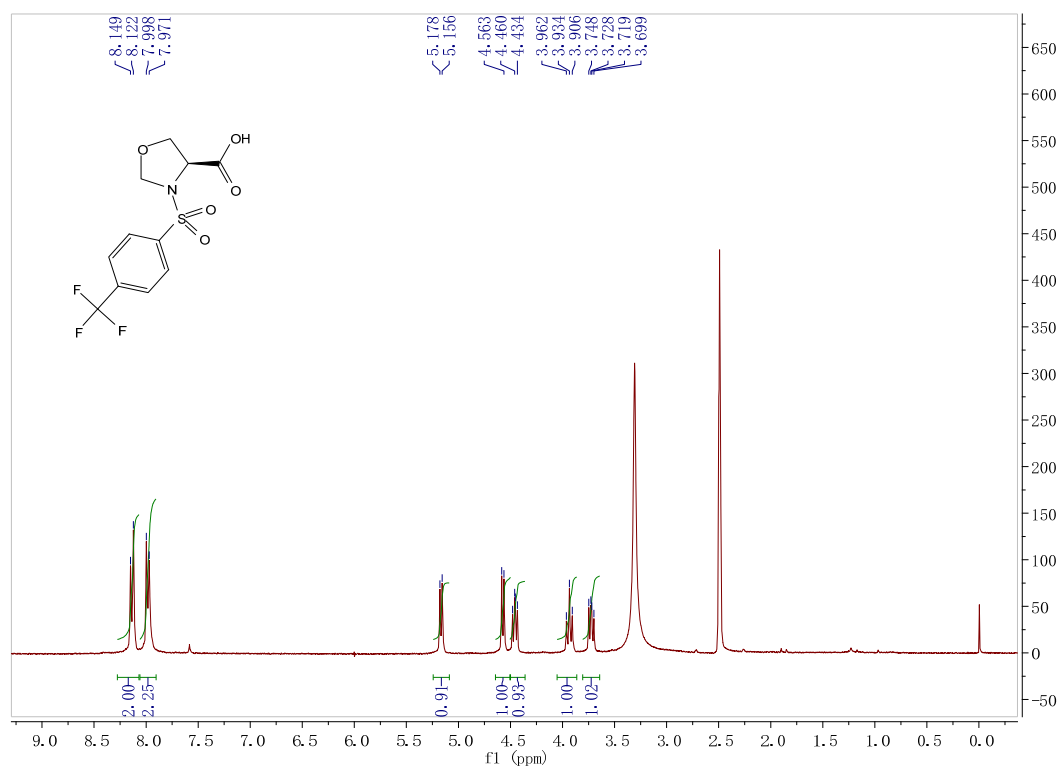

**Figure S3a:** <sup>1</sup>H NMR (300 MHz, DMSO-d<sub>6</sub>) spectrum of 4S-TFSO

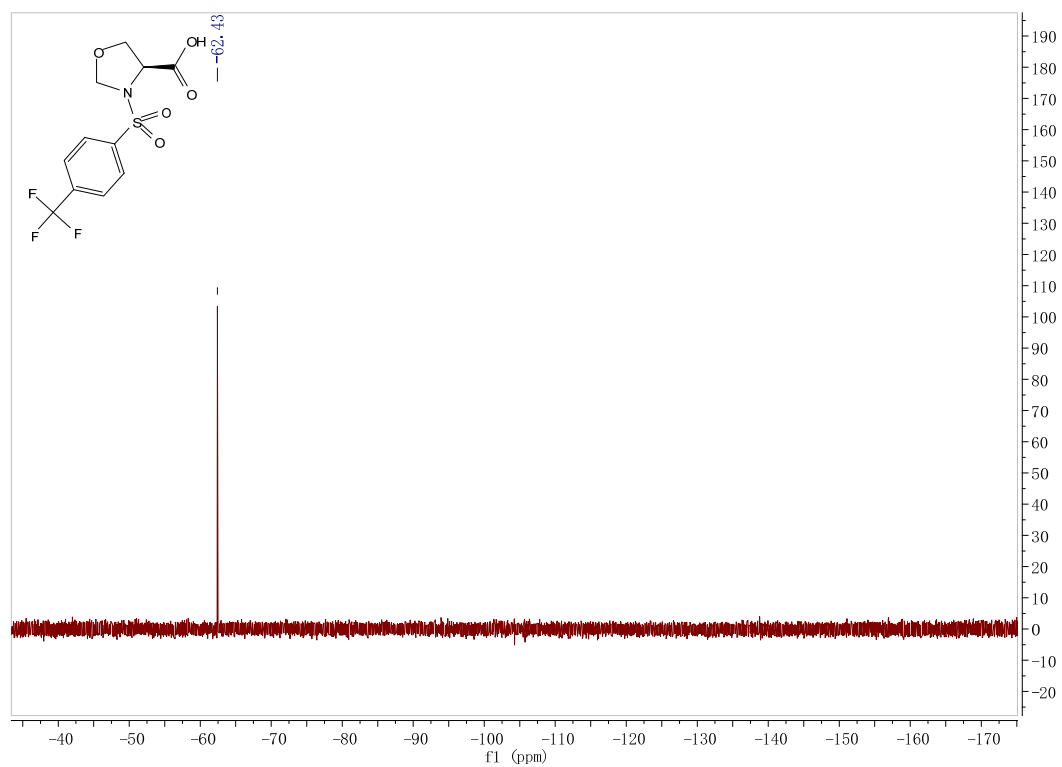

**Figure S3b:** <sup>19</sup>F NMR (282 MHz, DMSO-d<sub>6</sub>) spectrum of 4S-TFSO

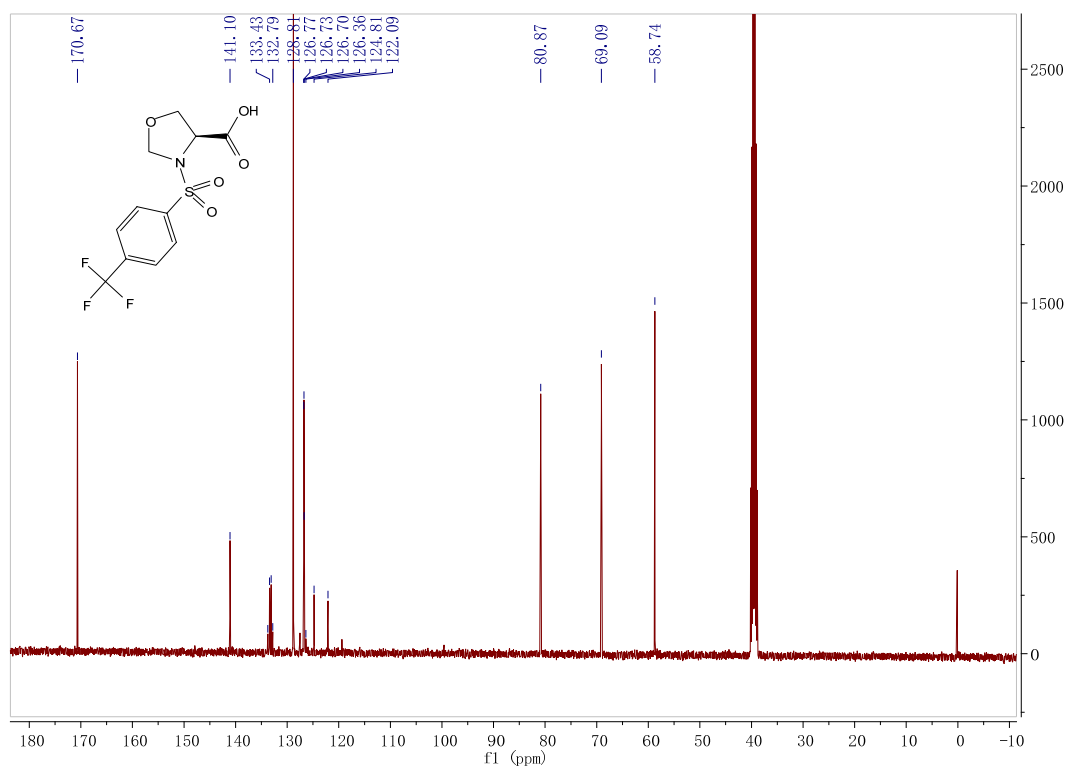

**Figure S3c:** <sup>13</sup>C NMR (100 MHz, DMSO-d<sub>6</sub>) spectrum of 4S-TFSO

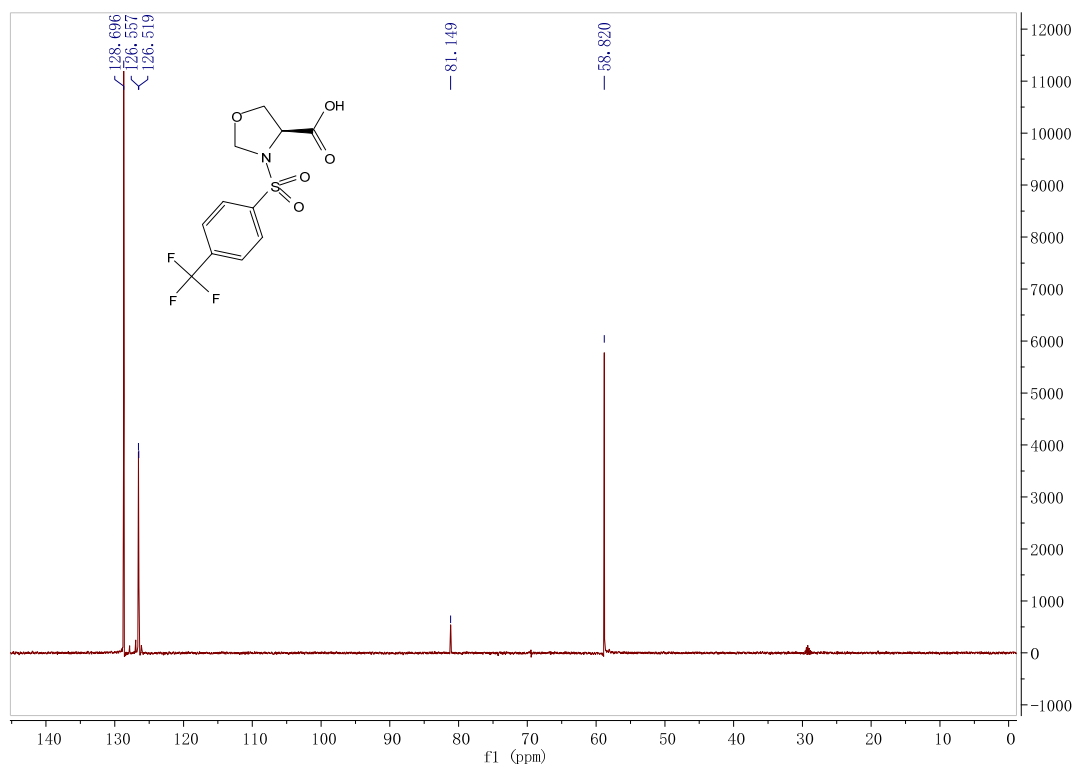

**Figure S3d:** DEPT 90 NMR (100 MHz, DMSO-d<sub>6</sub>) spectrum of 4S-TFSO

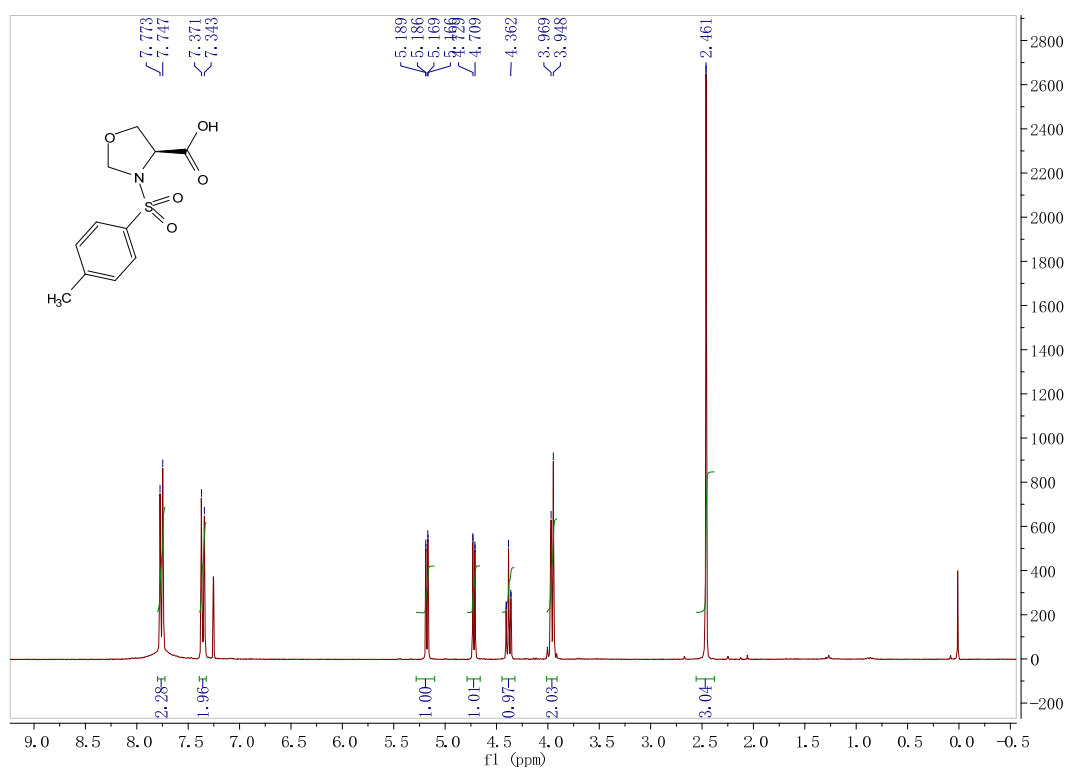

**Figure S4a:**  $^1\text{H}$  NMR (300 MHz,  $\text{CDCl}_3$ ) spectrum of **4S-MESO**

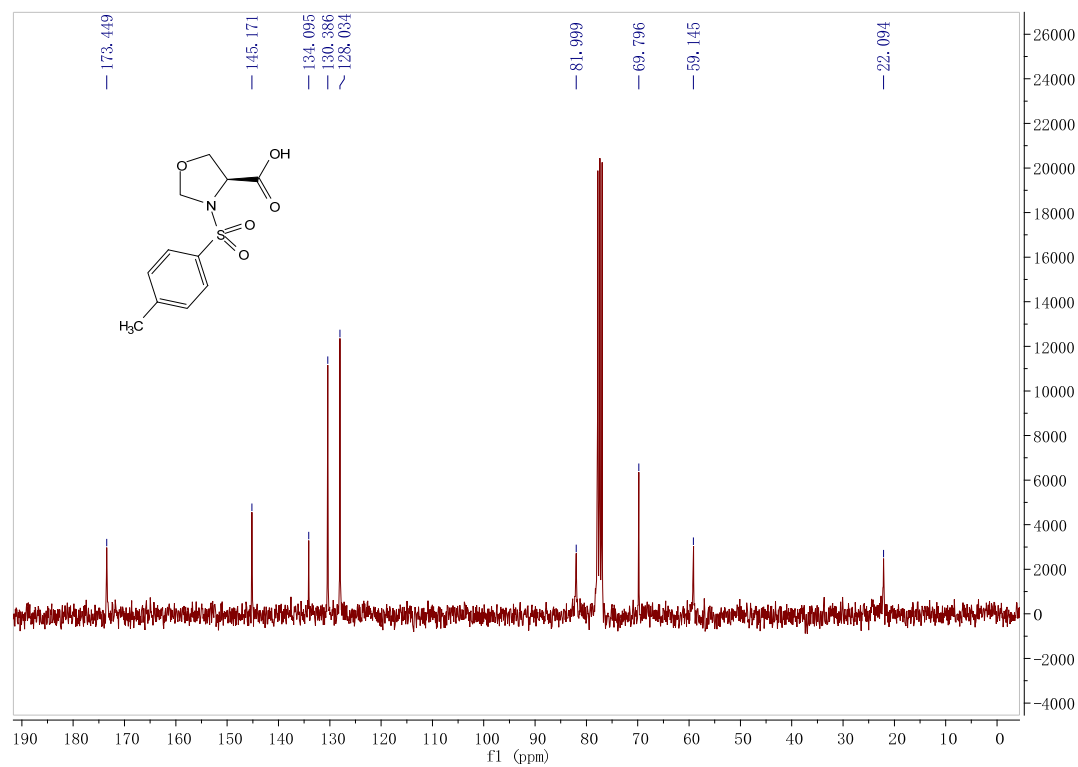

**Figure S4b:**  $^{13}\text{C}$  NMR (75 MHz,  $\text{CDCl}_3$ ) spectrum of **4S-MESO**

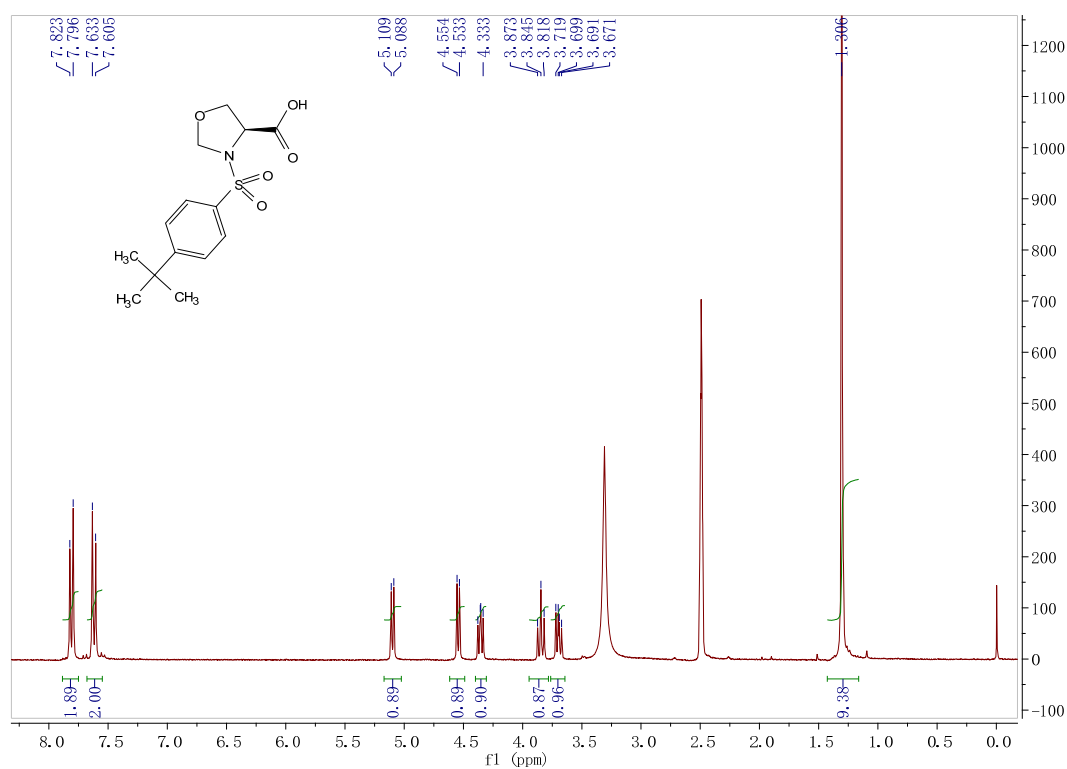

**Figure S5a:** <sup>1</sup>H NMR (300 MHz, DMSO-d<sub>6</sub>) spectrum of **4S-TBSO**

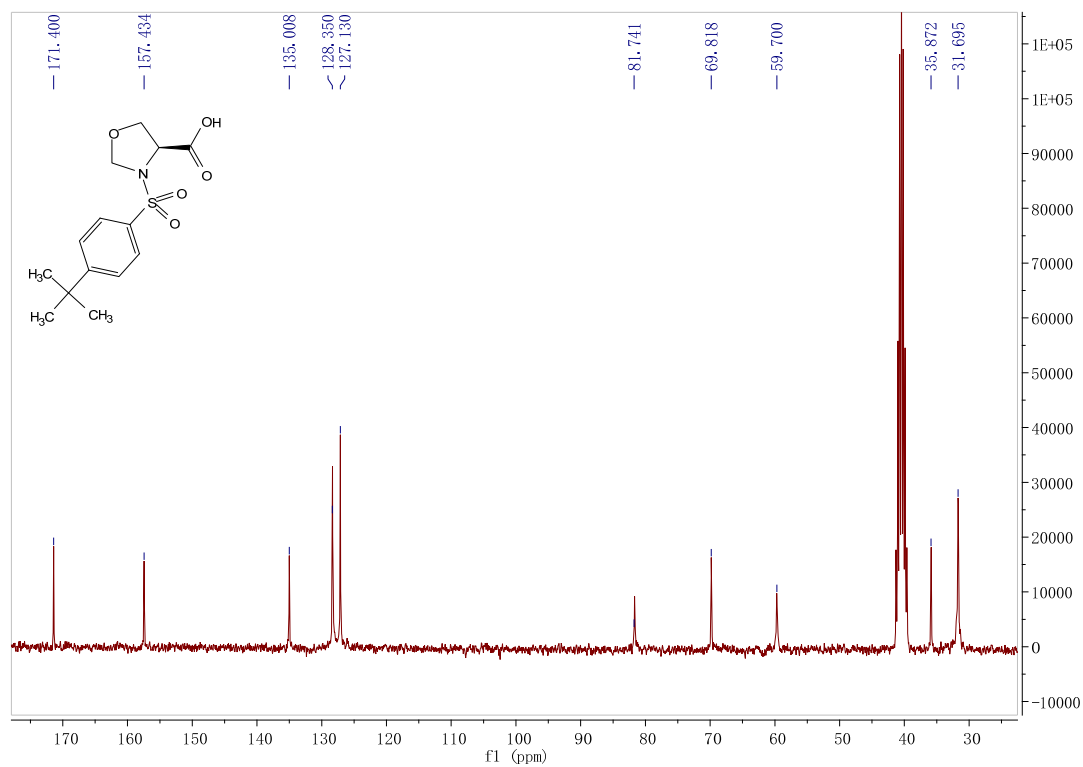

**Figure S5b:** <sup>13</sup>C NMR (75 MHz, DMSO-d<sub>6</sub>) spectrum of **4S-TBSO**

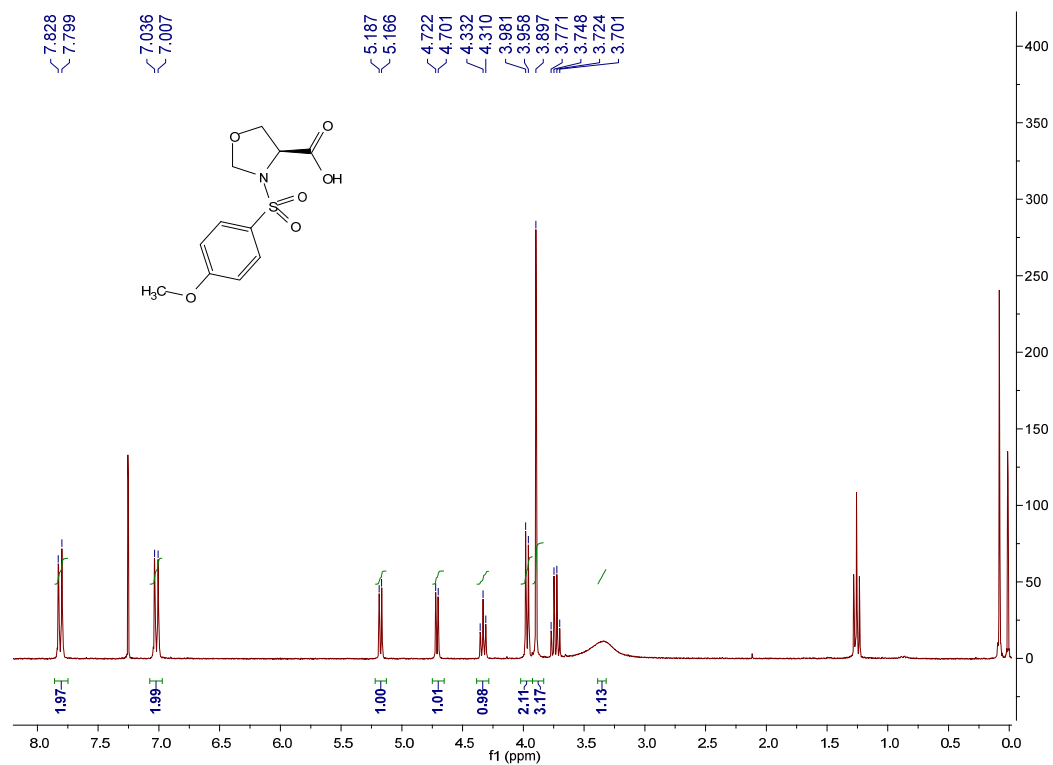

**Figure S6a:** <sup>1</sup>H NMR (300 MHz, DMSO-d<sub>6</sub>) spectrum of 4S-MOSO

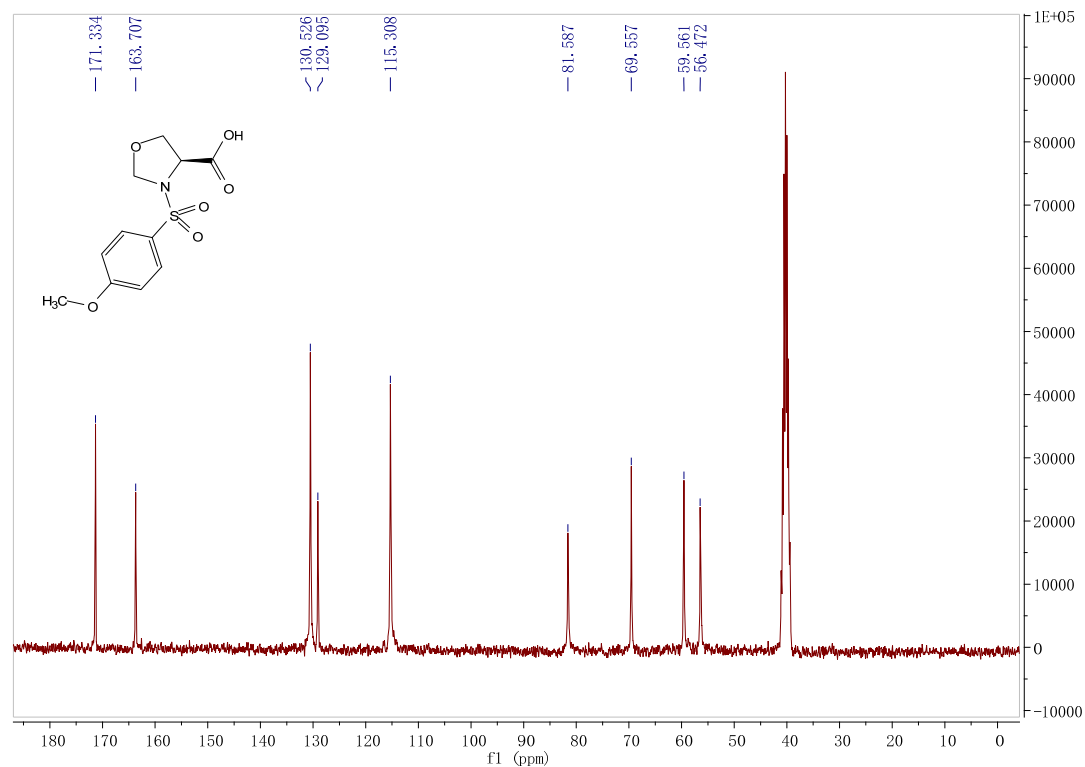

**Figure S6b:** <sup>13</sup>C NMR (75 MHz, DMSO-d<sub>6</sub>) spectrum of 4S-MOSO

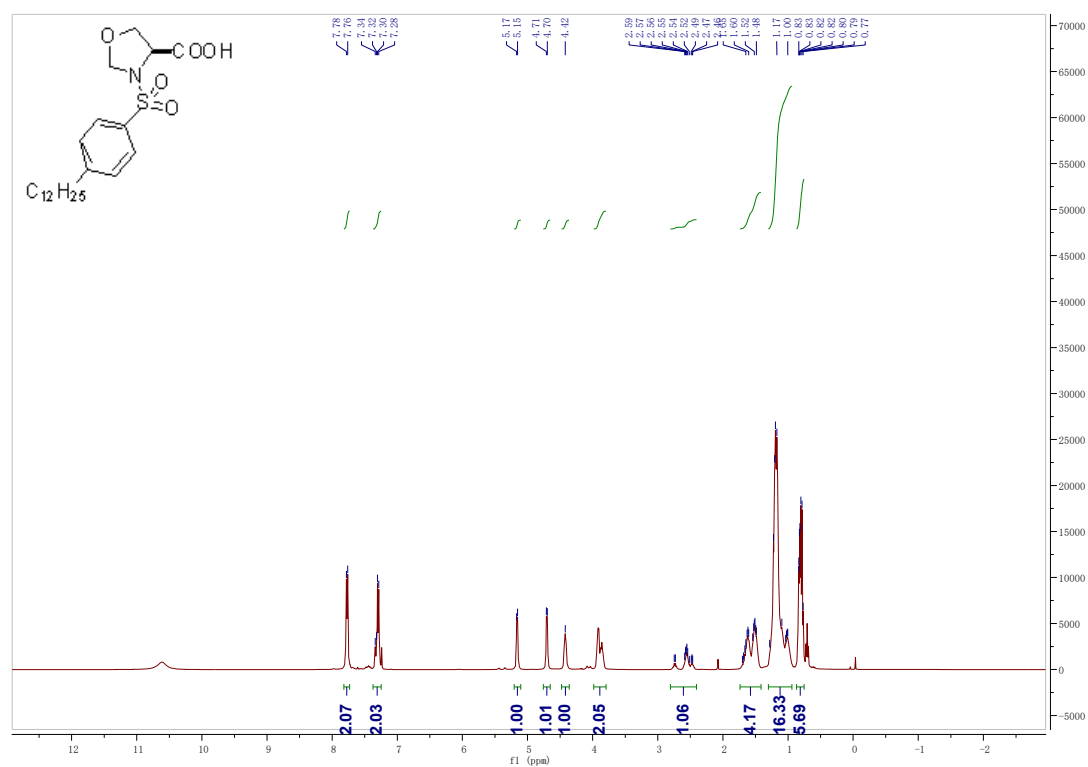

**Figure S7a:** <sup>1</sup>H NMR (400 MHz, CDCl<sub>3</sub>) spectrum of 4S-DOSO

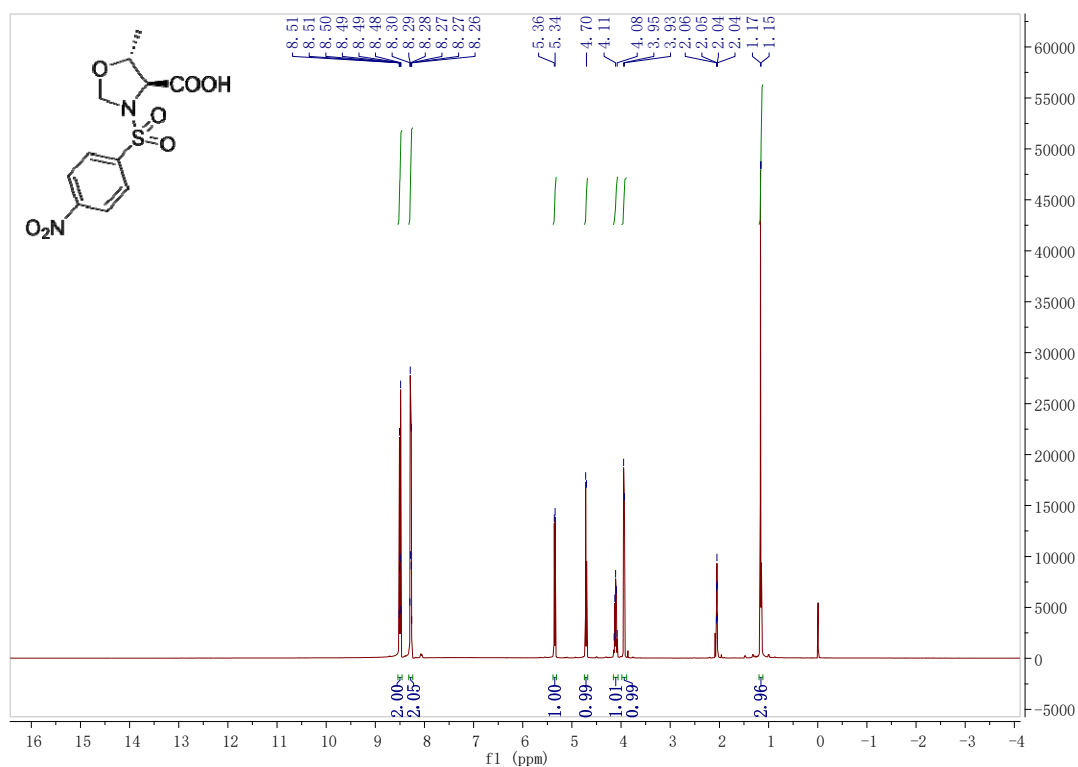

**Figure S8a:** <sup>1</sup>H NMR (400 MHz, acetone-d<sub>6</sub>) spectrum of 4S,5R-MNOSO

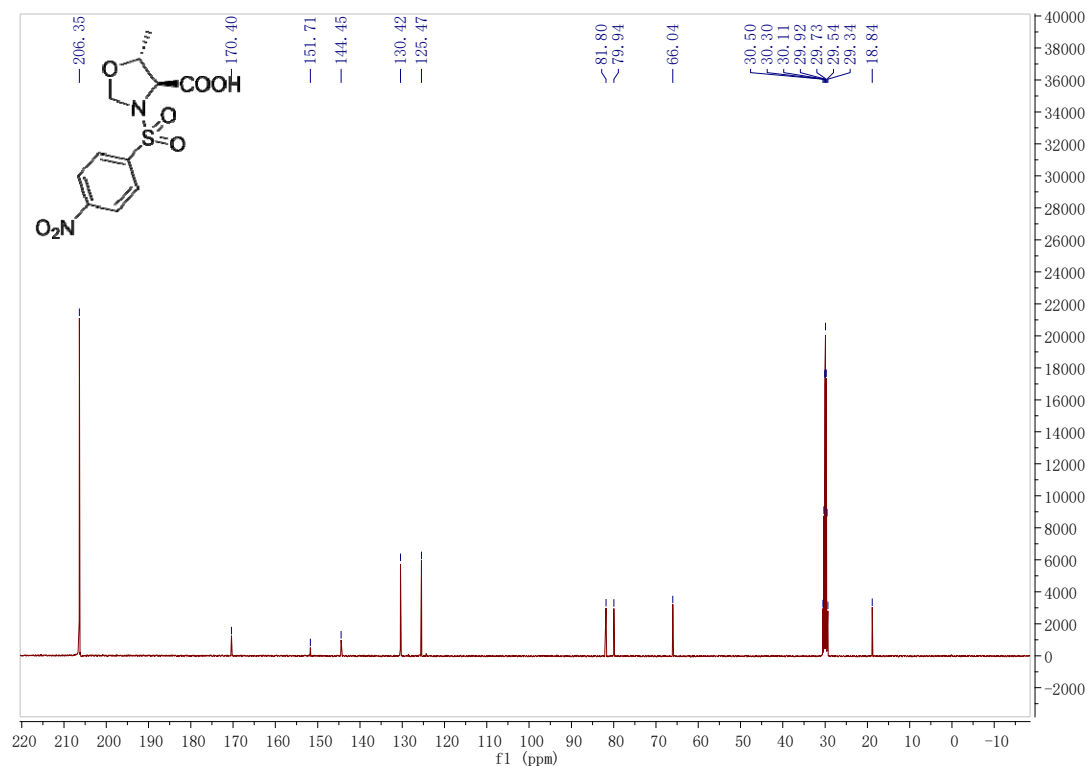

**Figure S8b:** <sup>13</sup>C NMR (100 MHz, acetone-d<sub>6</sub>) spectrum of 4S,5R-MNOSO

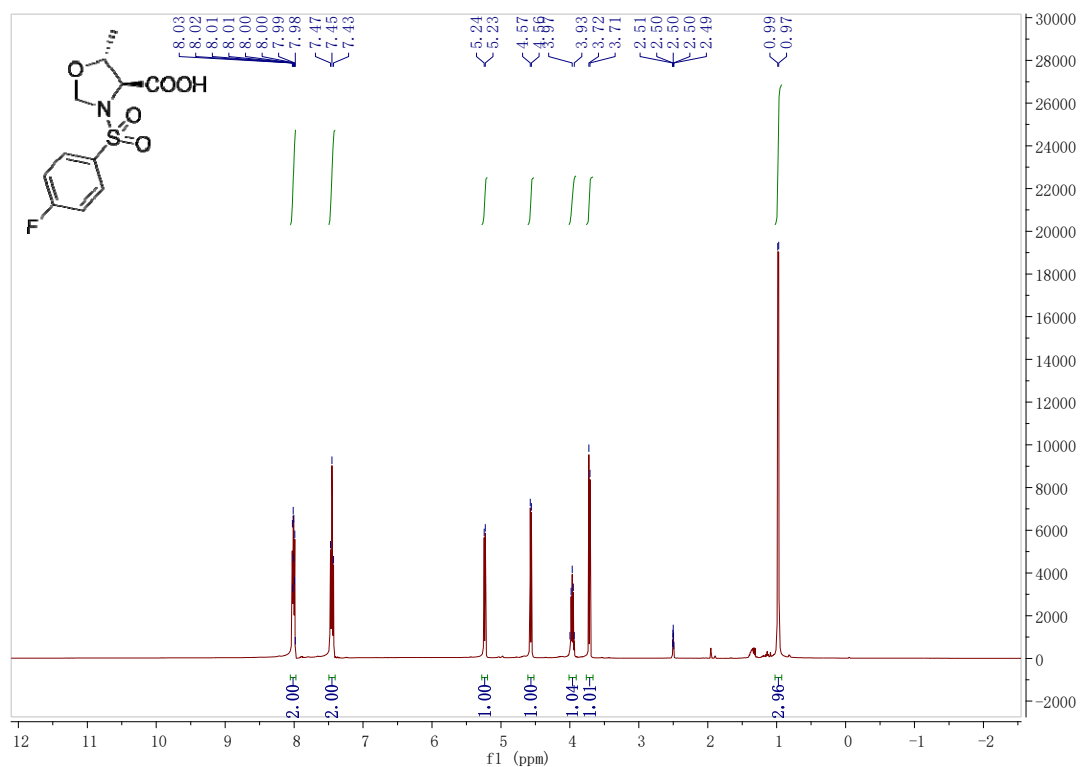

**Figure S9a:** <sup>1</sup>H NMR (400 MHz, DMSO-d<sub>6</sub>) spectrum of 4S,5R-MFLSO

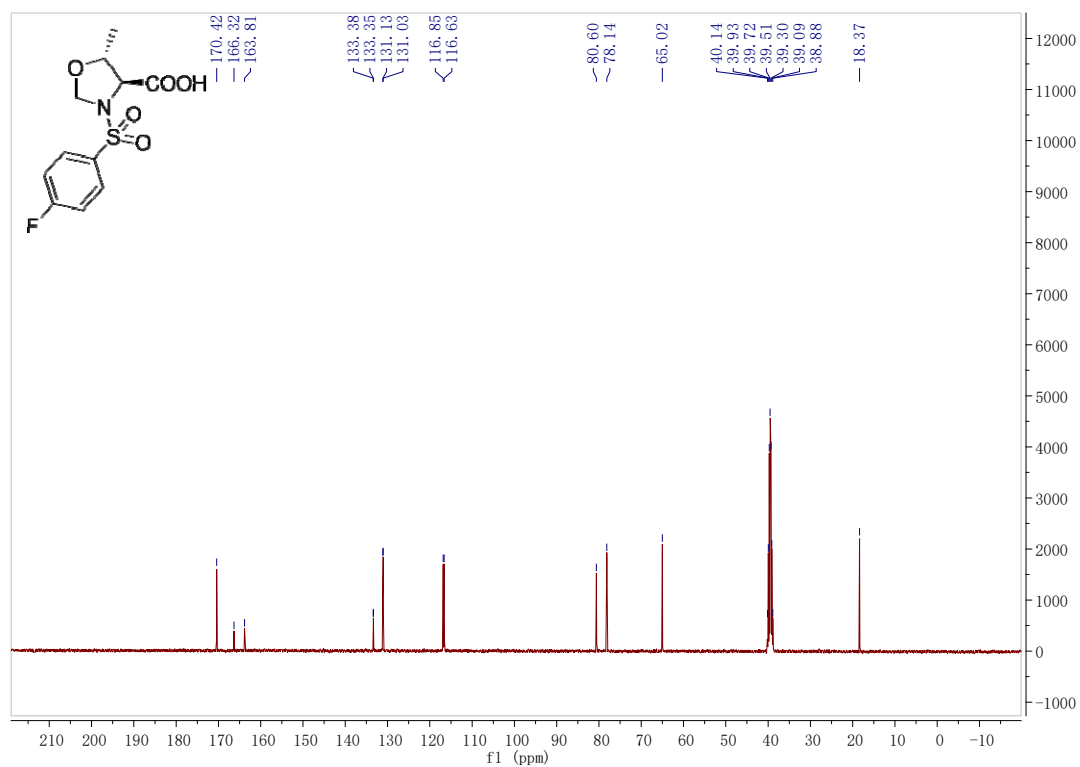

**Figure S9b:** <sup>13</sup>C NMR (100 MHz, DMSO-d<sub>6</sub>) spectrum of 4S,5R-MFLSO

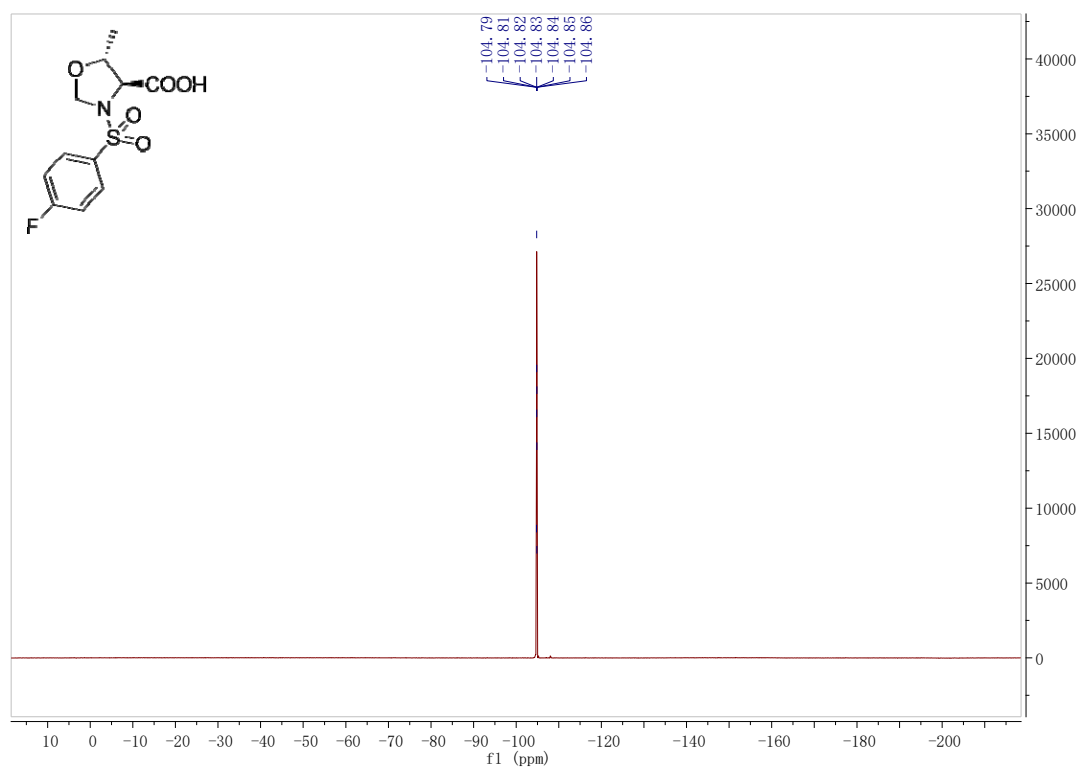

**Figure S9c:**  $^{19}\text{F}$  NMR (377 MHz, DMSO- $\text{d}_6$ ) spectrum of 4S,5R-MFLSO

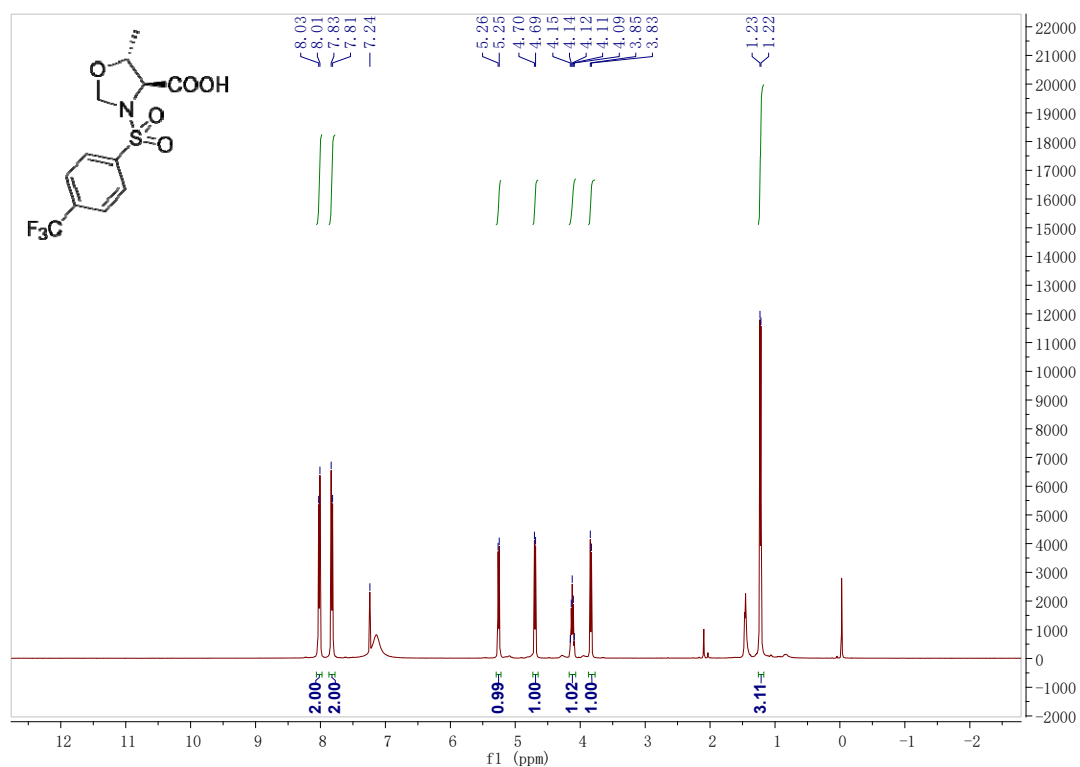

**Figure S10a:** <sup>1</sup>H NMR (400 MHz, CDCl<sub>3</sub>) spectrum of **4S,5R-MTFSO**

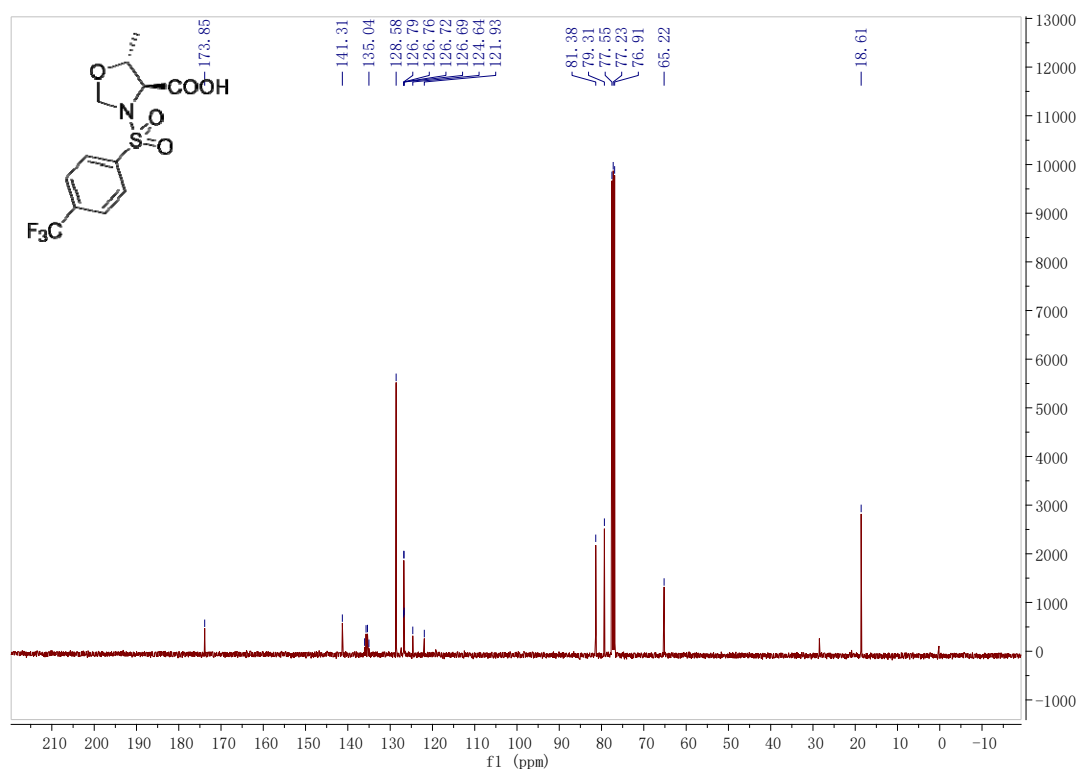

**Figure S10b:** <sup>13</sup>C NMR (100 MHz, CDCl<sub>3</sub>) spectrum of **4S,5R-MTFSO**

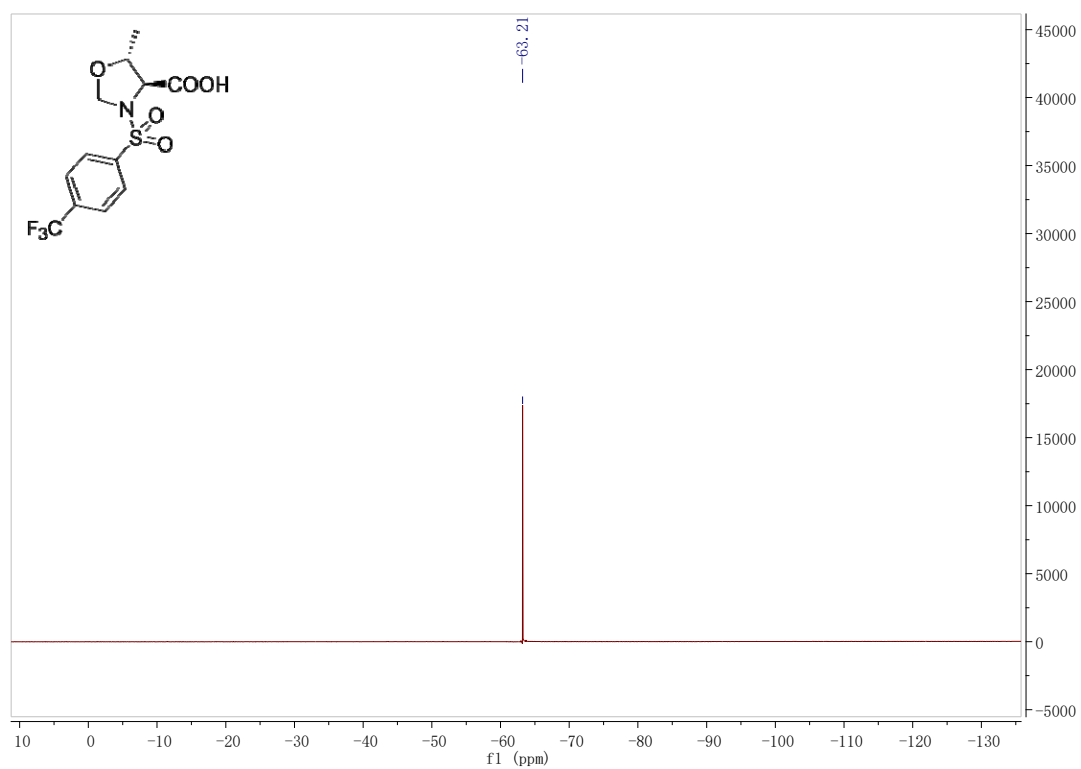

**Figure S10c:**  $^{19}\text{F}$  NMR (377 MHz,  $\text{CDCl}_3$ ) spectrum of 4*S*,5*R*-MTFSO

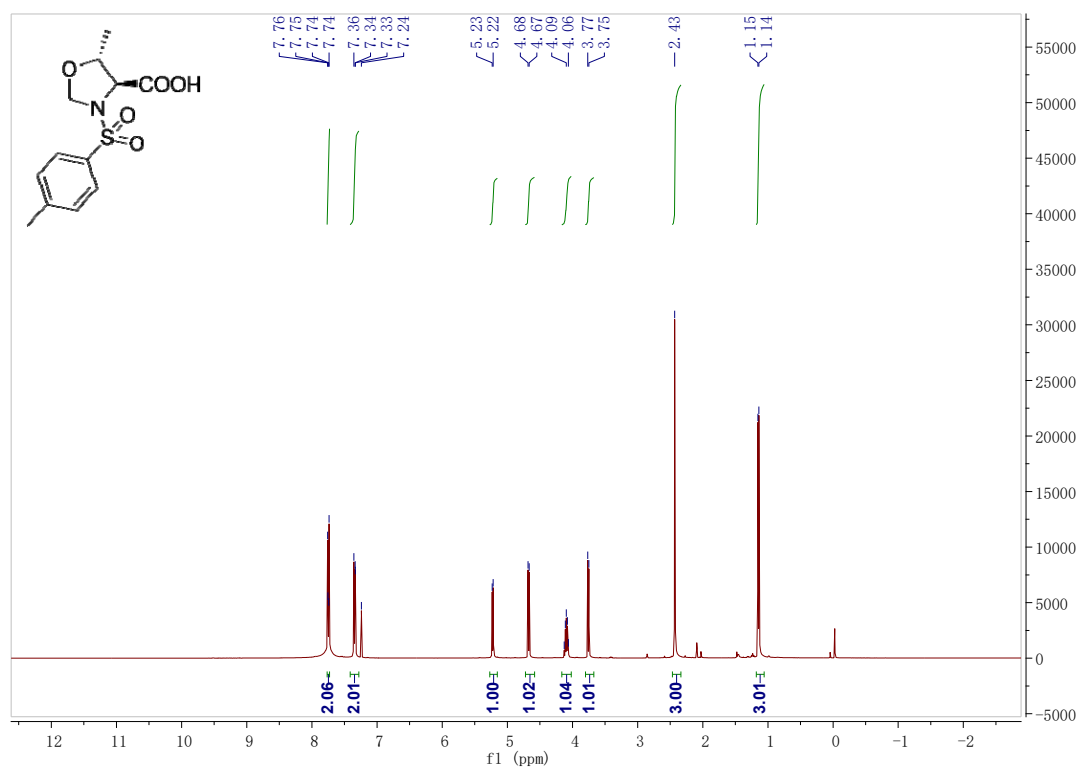

**Figure S11a:**  $^1\text{H}$  NMR (400 MHz,  $\text{CDCl}_3$ ) spectrum of 4*S*,5*R*-MMESO

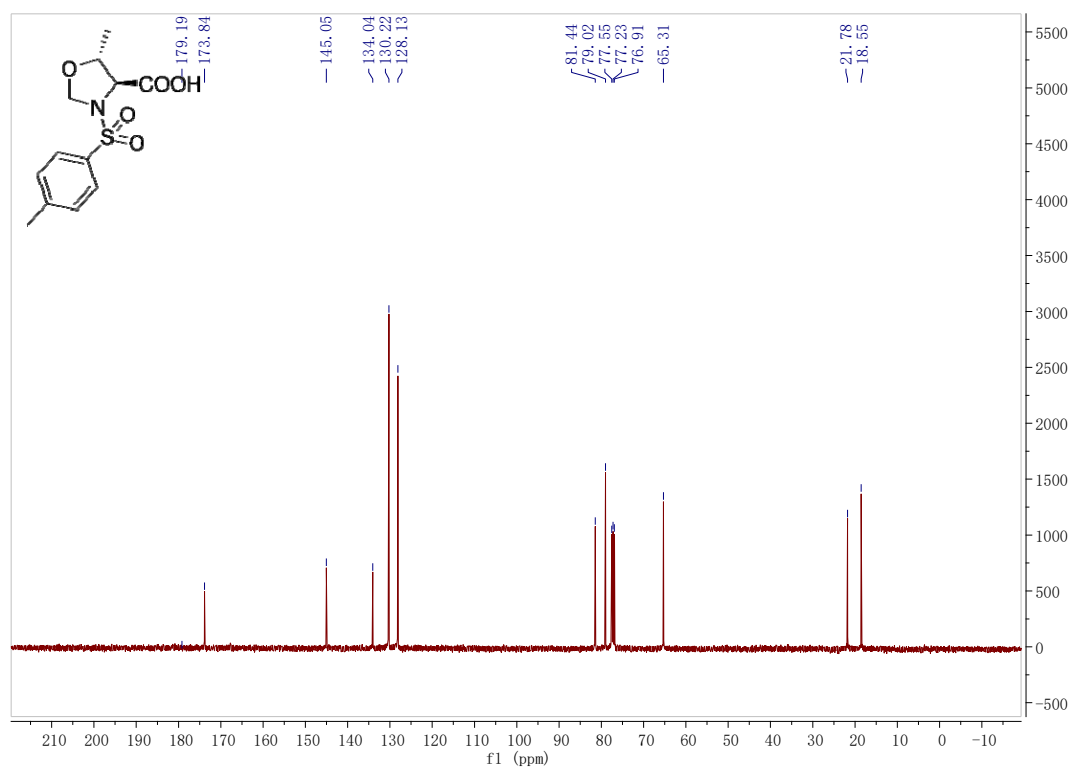

**Figure S11b:**  $^{13}\text{C}$  NMR (100 MHz,  $\text{CDCl}_3$ ) spectrum of 4*S*,5*R*-MMESO

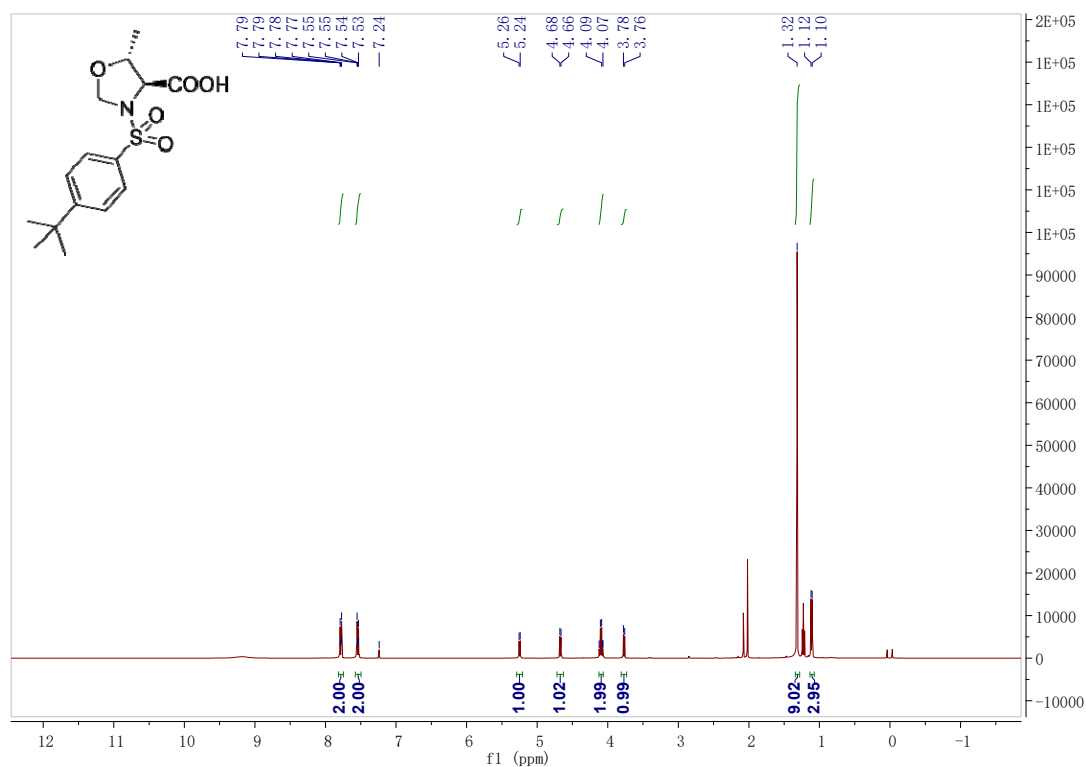

**Figure S12a:** <sup>1</sup>H NMR (400 MHz, CDCl<sub>3</sub>) spectrum of 4S,5R-MTBSO

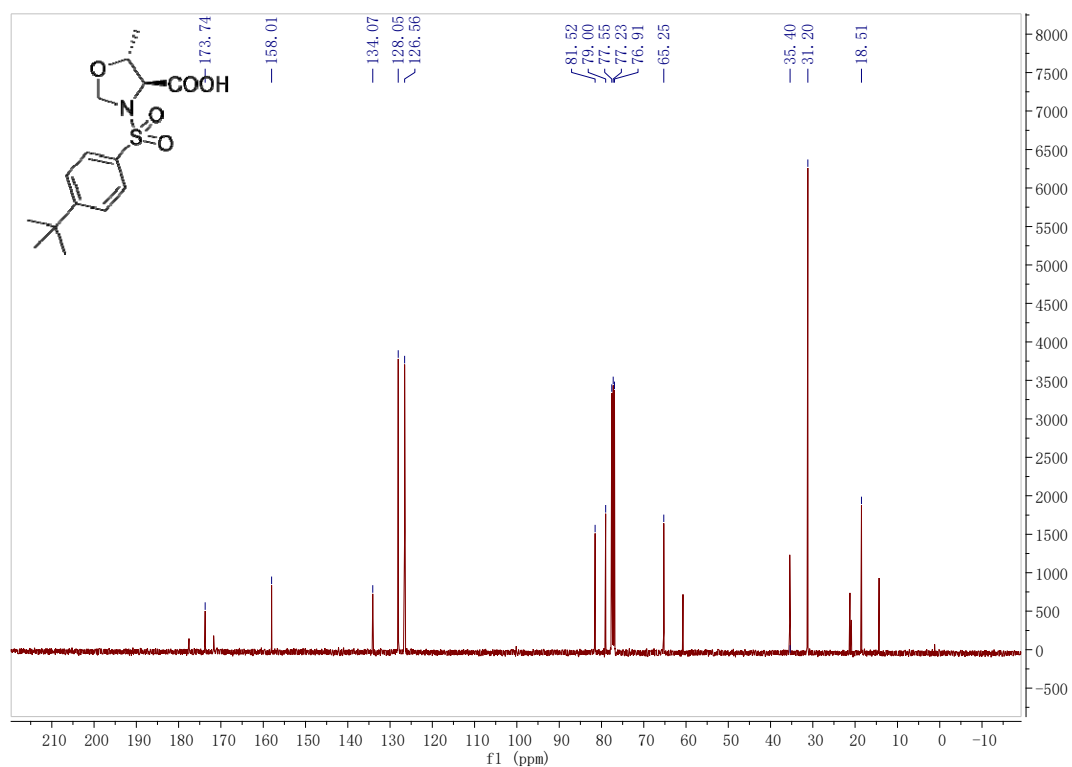

**Figure S12b:** <sup>13</sup>C NMR (100 MHz, CDCl<sub>3</sub>) spectrum of 4S,5R-MTBSO

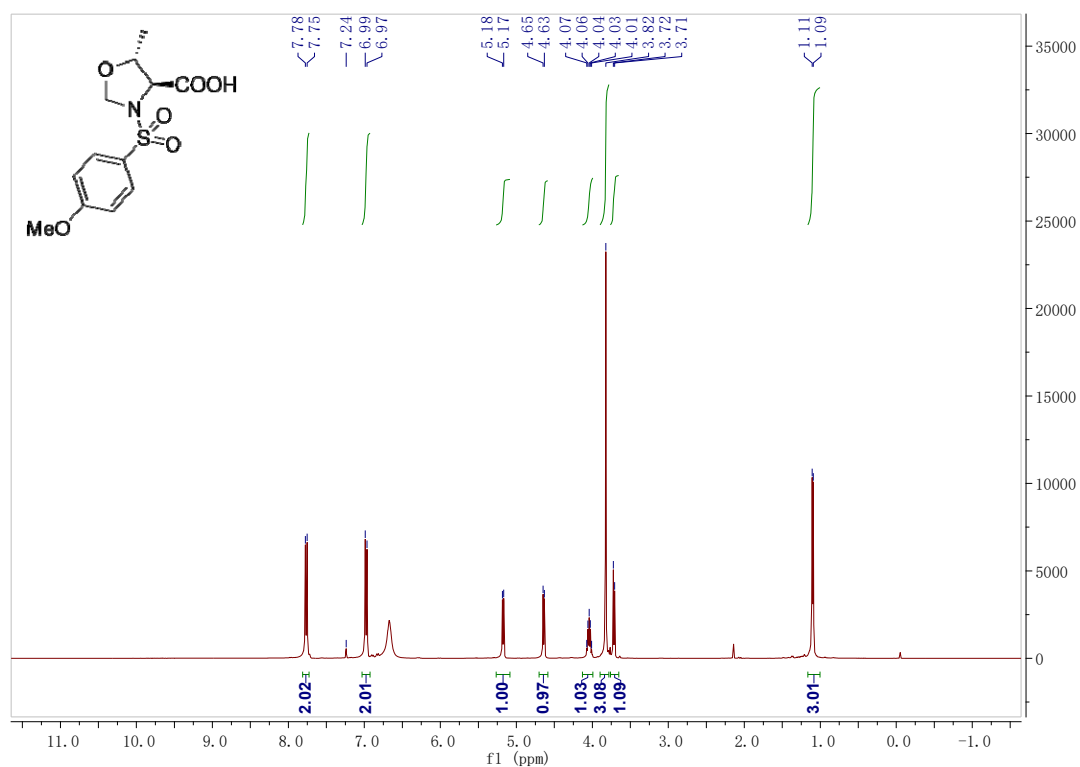

**Figure S13a:**  $^1\text{H}$  NMR (400 MHz,  $\text{CDCl}_3$ ) spectrum of 4S,5R-MMOSO

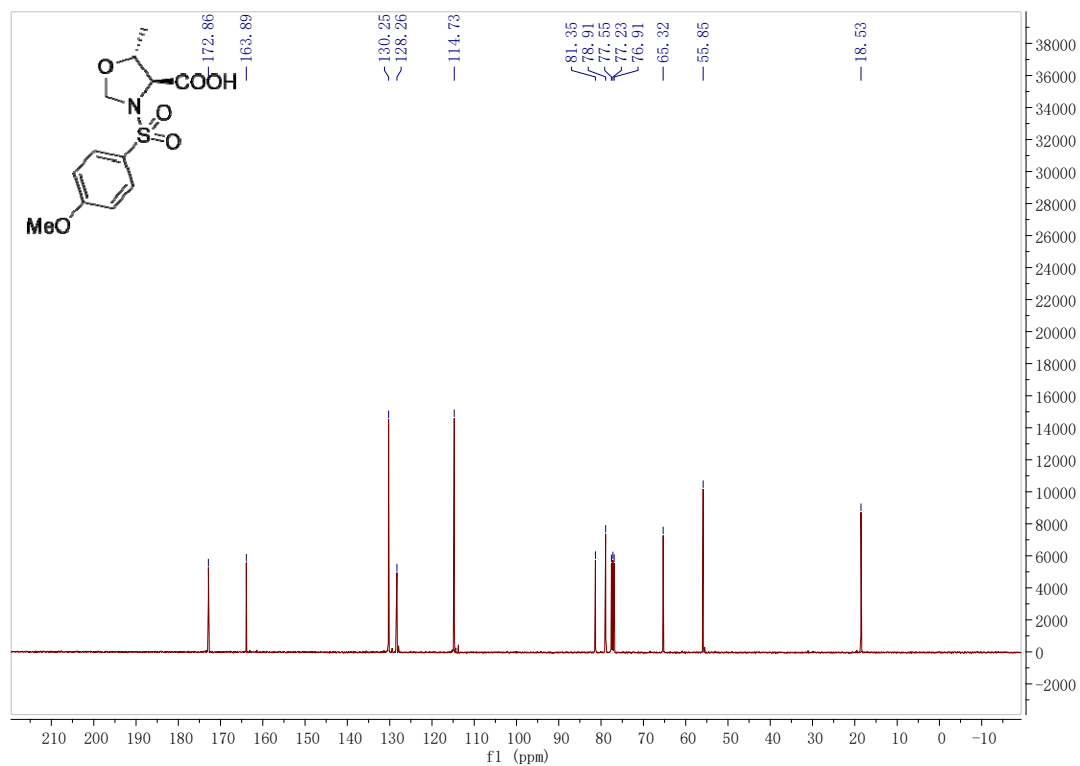

**Figure S13b:**  $^{13}\text{C}$  NMR (100 MHz,  $\text{CDCl}_3$ ) spectrum of 4S,5R-MMOSO

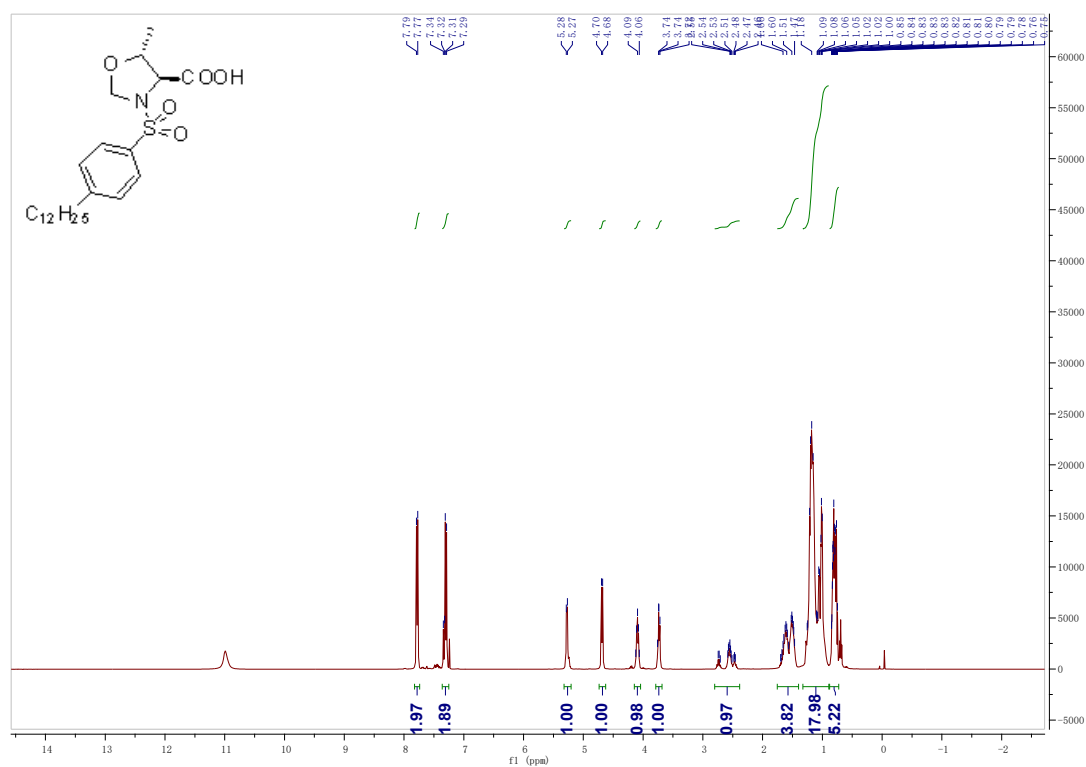

**Figure S14a:** <sup>1</sup>H NMR (400 MHz, CDCl<sub>3</sub>) spectrum of 4S,5R-MDOSO

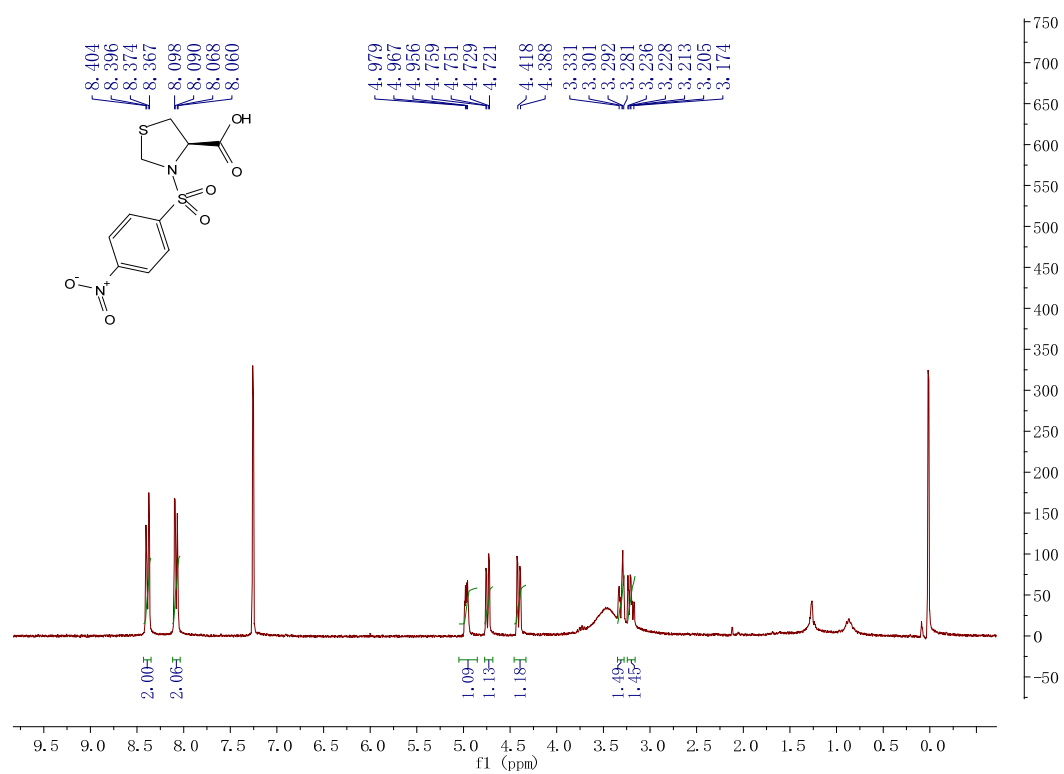

**Figure S15:** <sup>1</sup>H NMR (300 MHz, CDCl<sub>3</sub>) spectrum of (4R)-3-((4-nitrophenyl)sulfonyl)thiazolidine-4-carboxylic acid

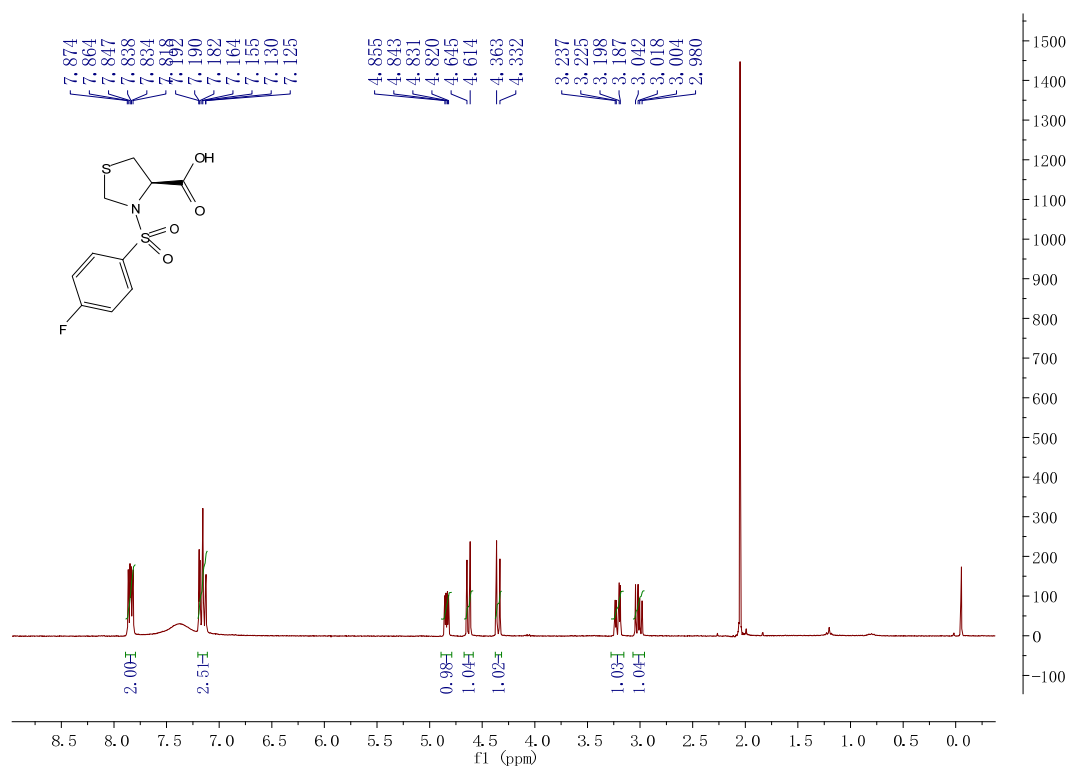

**Figure S16a:** <sup>1</sup>H NMR (300 MHz, acetone-d<sub>6</sub>) spectrum of **(4R)-3-((4-fluorophenyl)sulfonyl)thiazolidine-4-carboxylic acid**

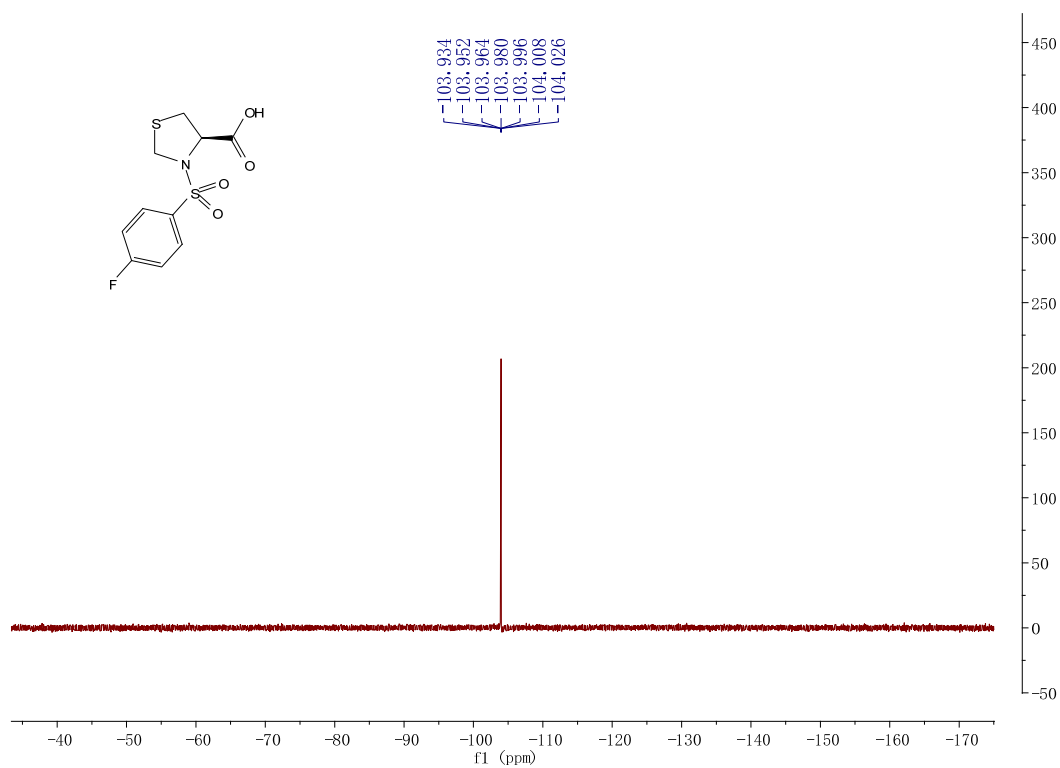

**Figure S16b:** <sup>19</sup>F NMR (282 MHz, acetone-d<sub>6</sub>) spectrum of **(4R)-3-((4-fluorophenyl)sulfonyl)thiazolidine-4-carboxylic acid**

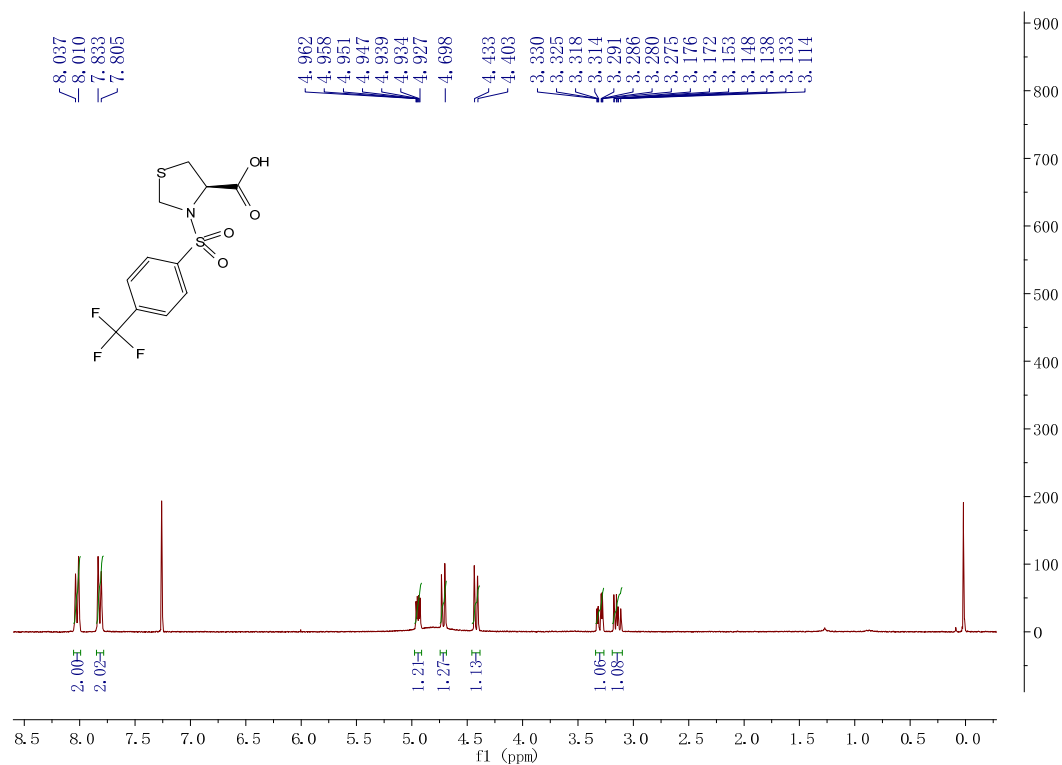

**Figure S17a:** <sup>1</sup>H NMR (300 MHz, CDCl<sub>3</sub>) spectrum of **(4R)-3-((4-trifluoromethyl)phenyl)sulfonylthiazolidine-4-carboxylic acid**

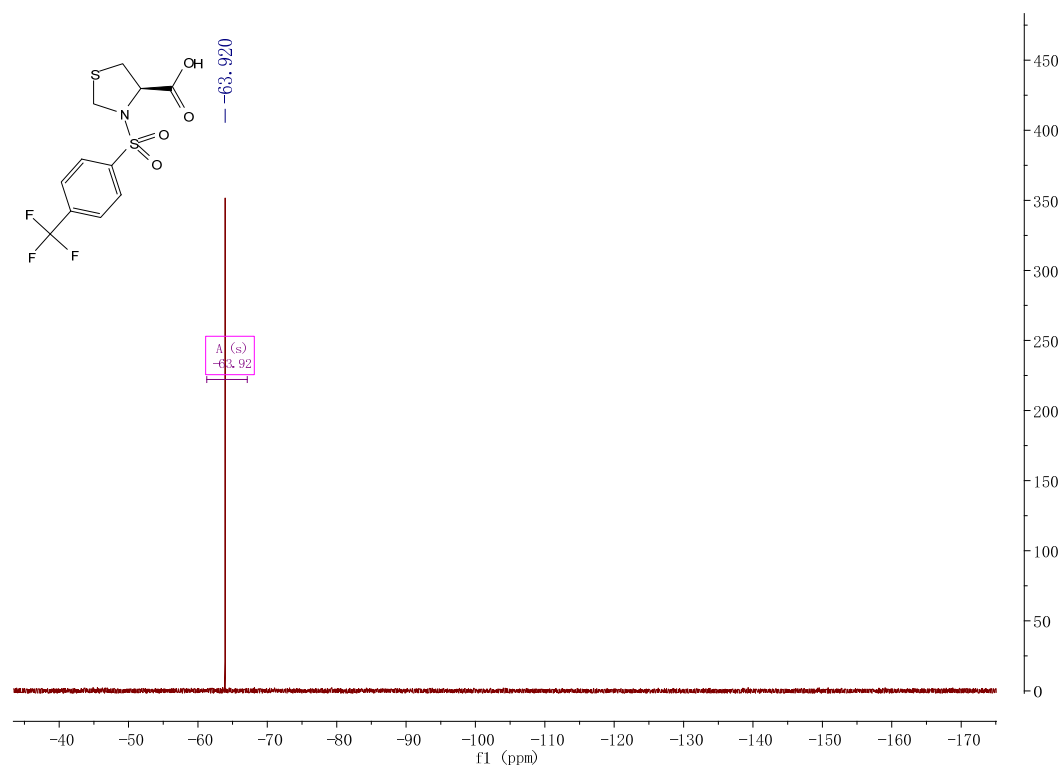

**Figure S17b:** <sup>19</sup>F NMR (282 MHz, CDCl<sub>3</sub>) spectrum of **(4R)-3-((4-trifluoromethyl)phenyl)sulfonylthiazolidine-4-carboxylic acid**

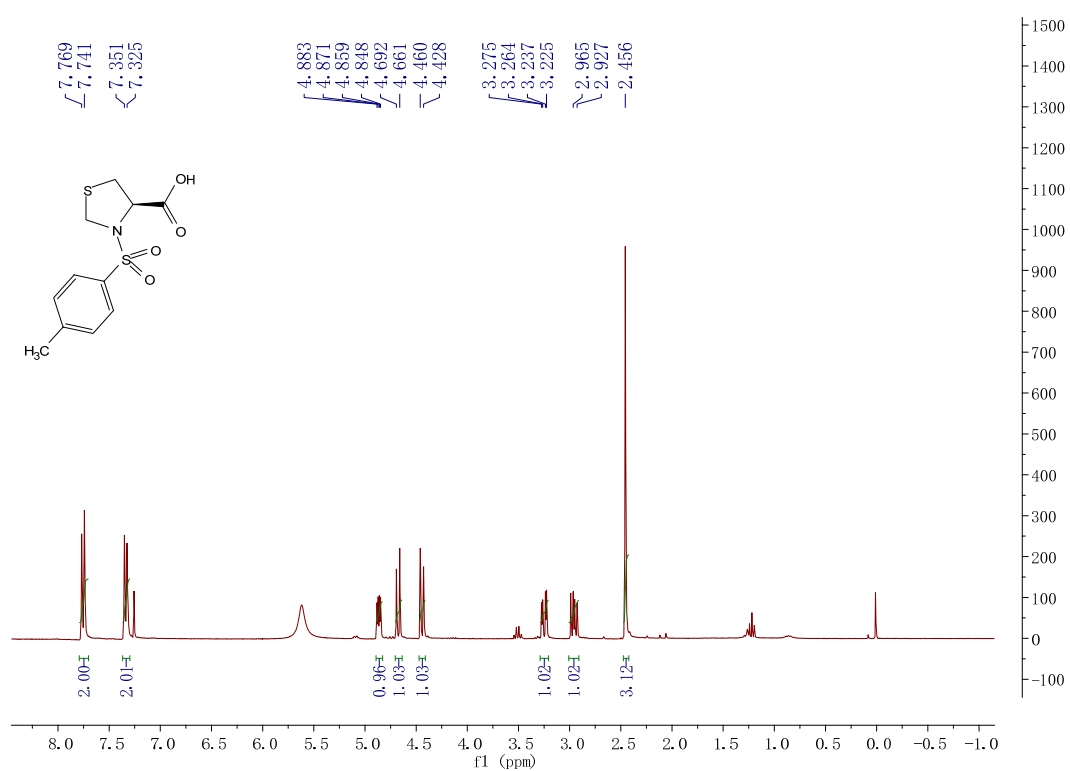

**Figure S18:** <sup>1</sup>H NMR (300 MHz, CDCl<sub>3</sub>) spectrum of (4R)-3-tosylthiazolidine-4-carboxylic acid

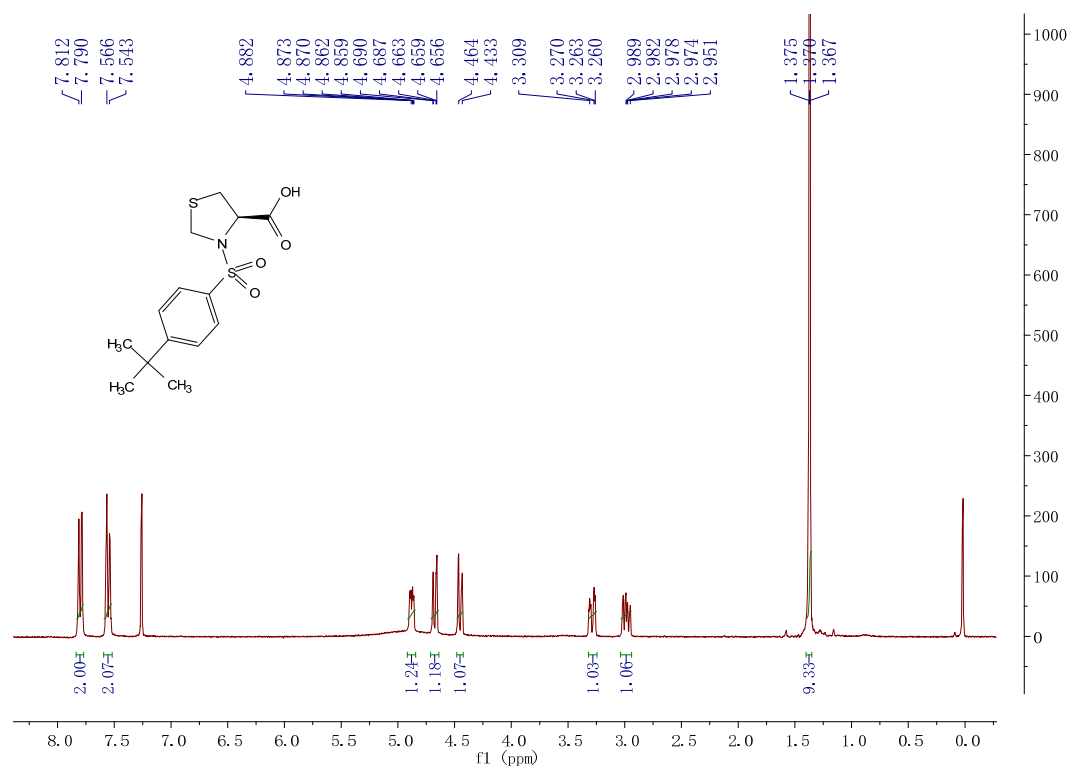

**Figure S19:** <sup>1</sup>H NMR (300 MHz, CDCl<sub>3</sub>) spectrum of **(4R)-3-((4-(tert-butyl)phenyl)sulfonyl)thiazolidine-4-carboxylic acid**

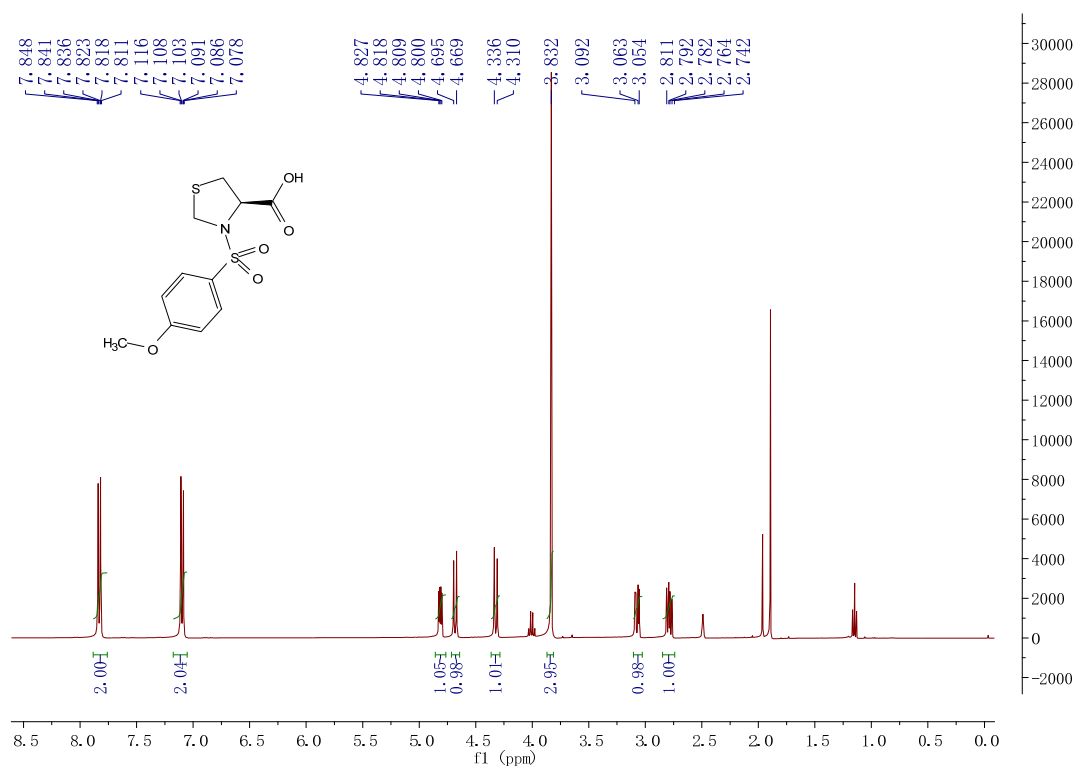

**Figure S20:** <sup>1</sup>H NMR (300 MHz, DMSO-d<sub>6</sub>) spectrum of **(4R)-3-((4-methoxyphenyl)sulfonyl)thiazolidine-4-carboxylic acid**

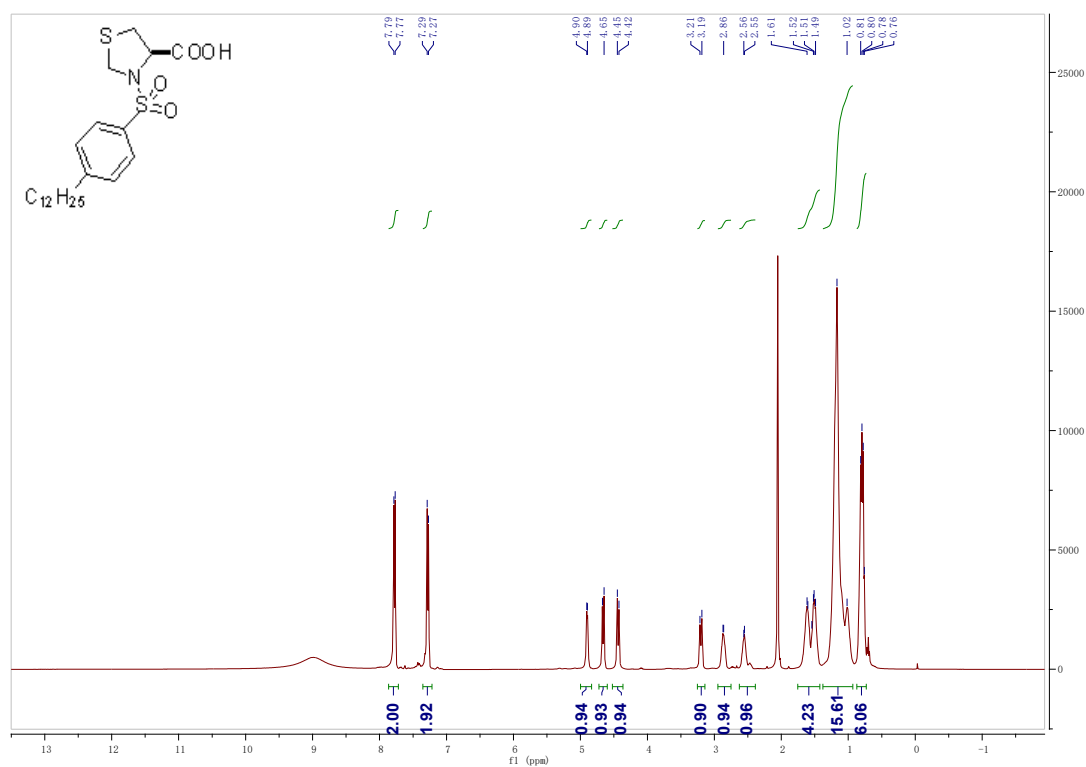

**Figure S21:** <sup>1</sup>H NMR (400 MHz, CDCl<sub>3</sub>) spectrum of **(4R)-3-((4-*n*-dodecylphenyl)sulfonyl)thiazolidine-4-carboxylic acid**

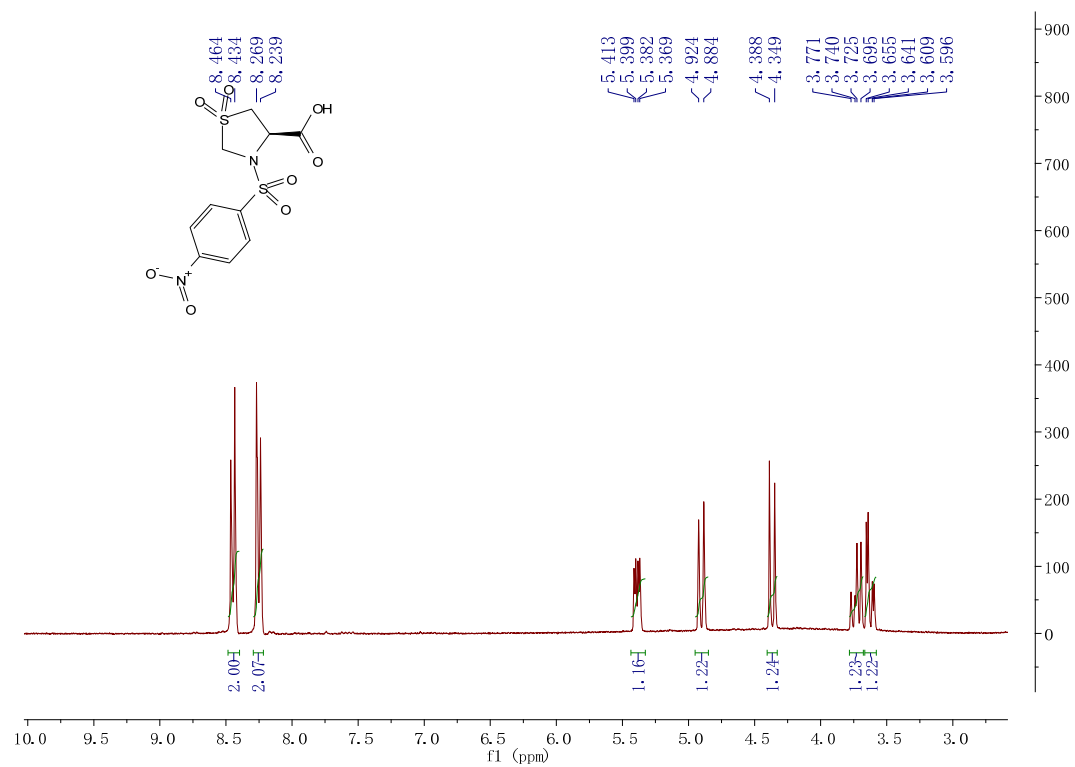

**Figure S22a:** <sup>1</sup>H NMR (300 MHz, acetone-d<sub>6</sub>) spectrum of 4R-NOST

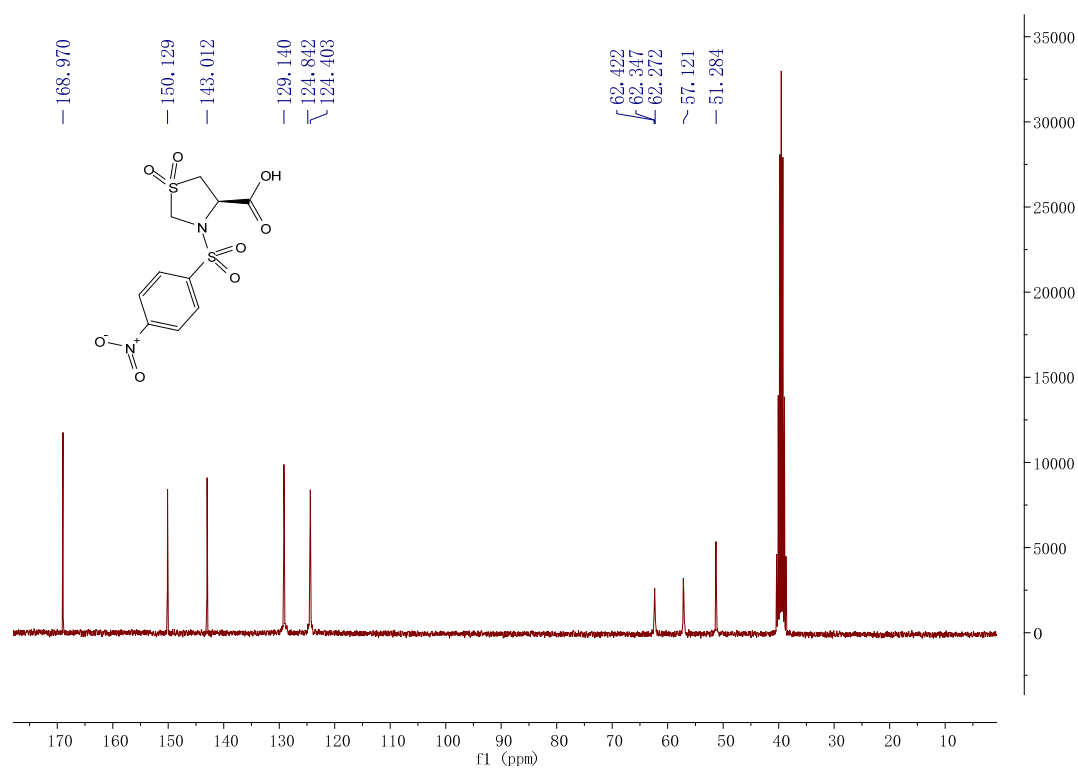

**Figure S22b:** <sup>13</sup>C NMR (75 MHz, DMSO-d<sub>6</sub>) spectrum of 4R-NOST

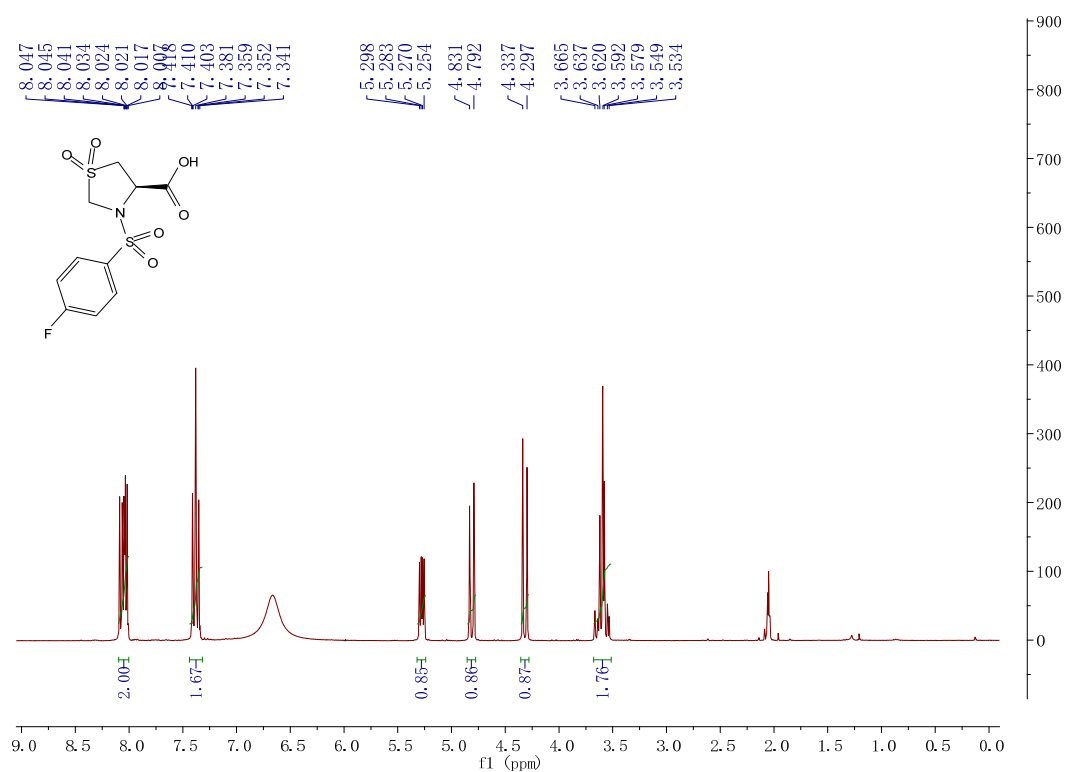

**Figure S23a:** <sup>1</sup>H NMR (300 MHz, acetone-d<sub>6</sub>) spectrum of 4R-FLST

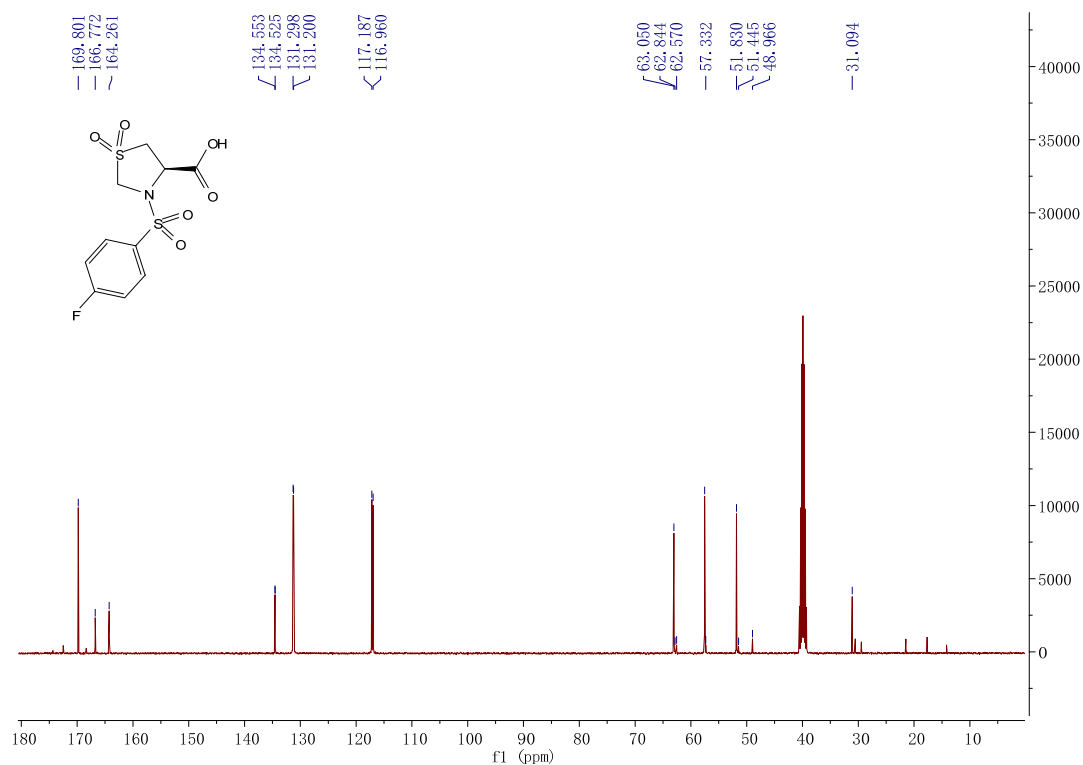

**Figure S23b:** <sup>13</sup>C NMR (100 MHz, DMSO-d<sub>6</sub>) spectrum of 4R-FLST

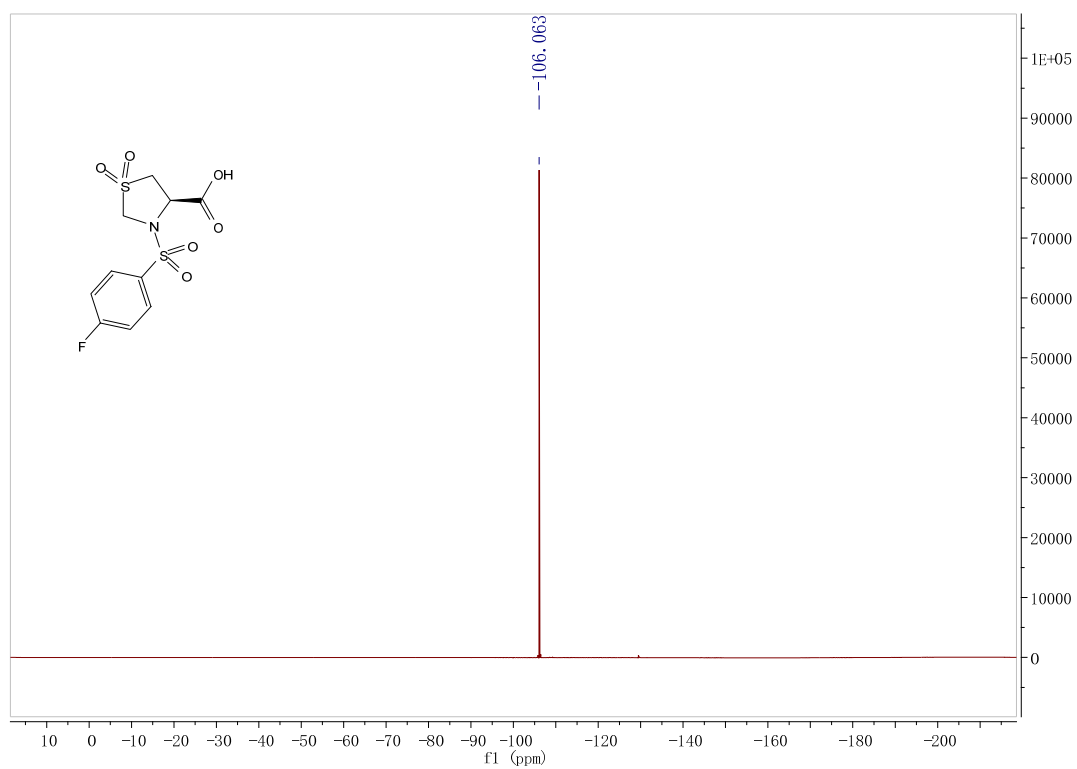

**Figure S23c:**  $^{19}\text{F}$  NMR (377 MHz, acetone- $\text{d}_6$ ) spectrum of **4R-FLST**

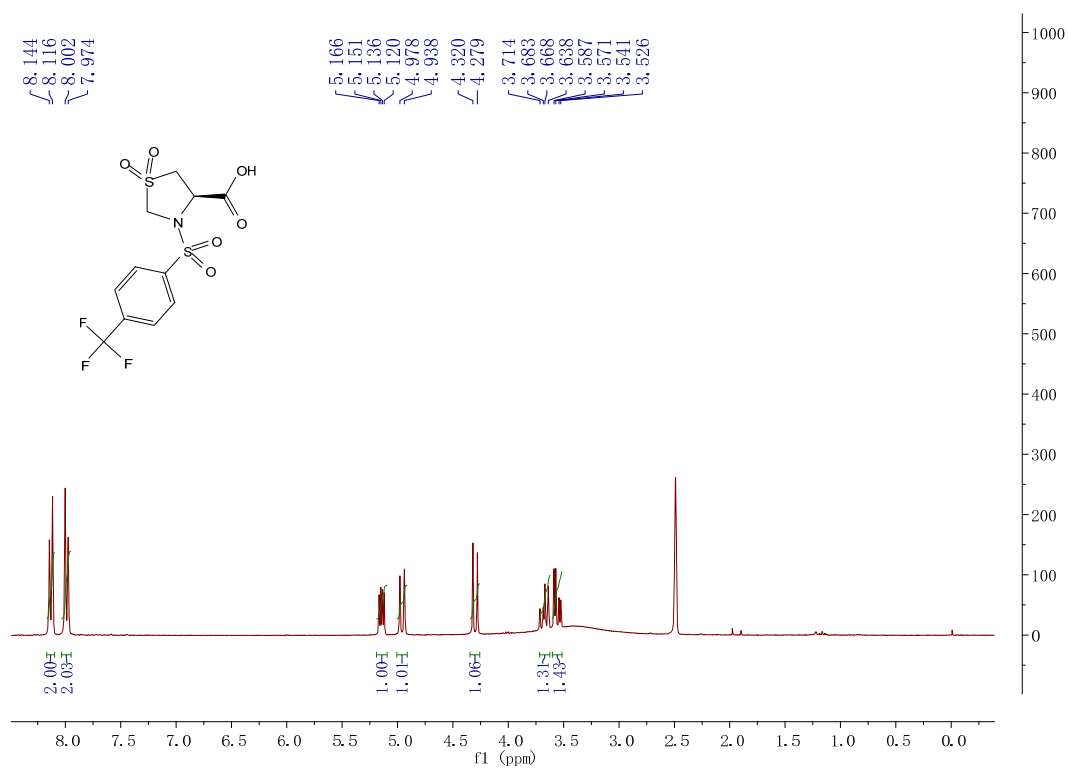

**Figure S24a:** <sup>1</sup>H NMR (300 MHz, DMSO-d<sub>6</sub>) spectrum of **4R-TFST**

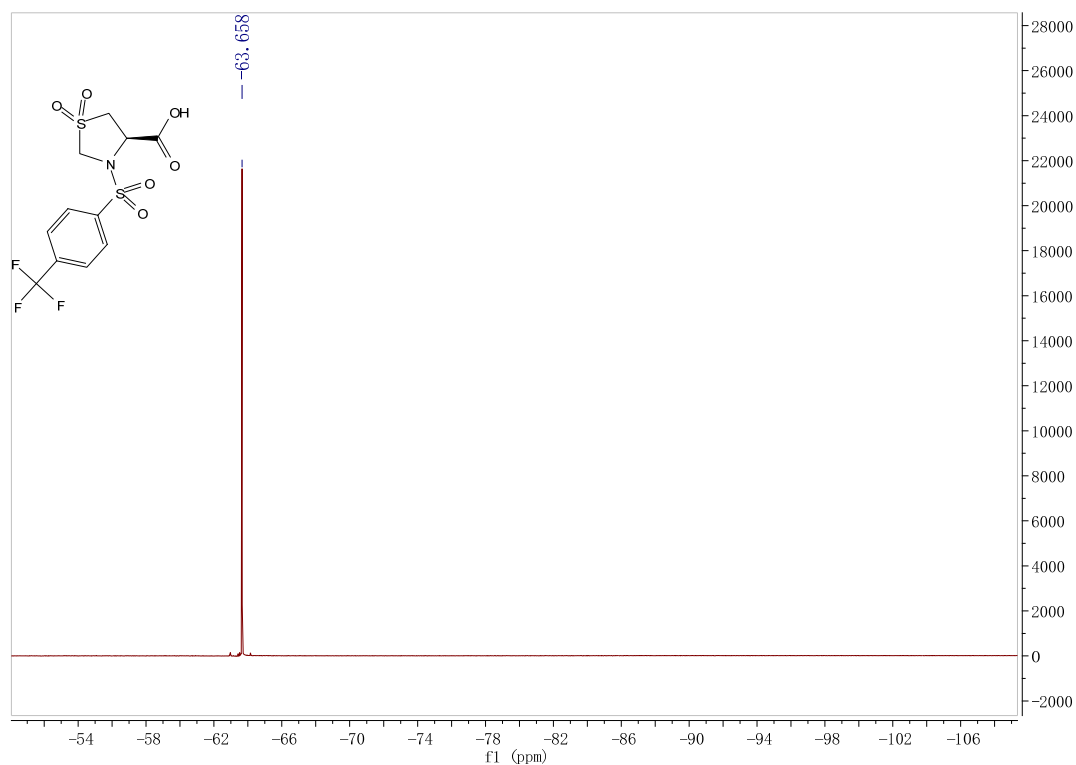

**Figure S24b:** <sup>19</sup>F NMR (377 MHz, acetone-d<sub>6</sub>) spectrum of **4R-TFST**

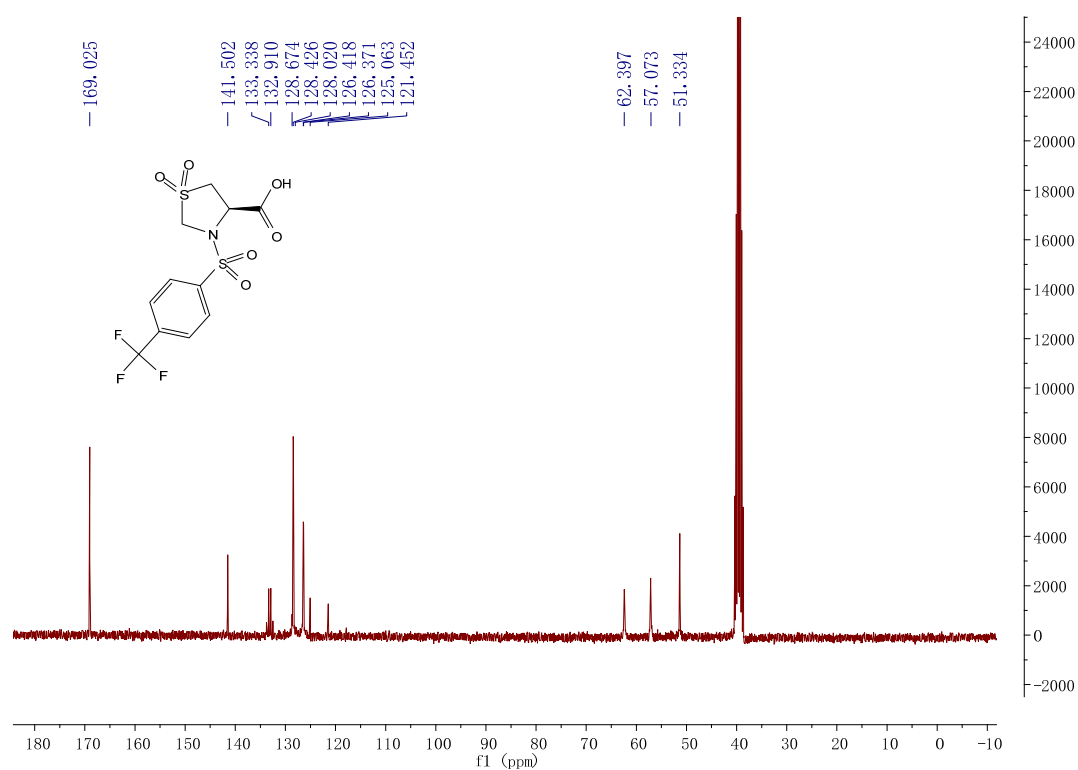

**Figure S24c:** <sup>13</sup>C NMR (75 MHz, DMSO-d<sub>6</sub>) spectrum of **4R-TFST**

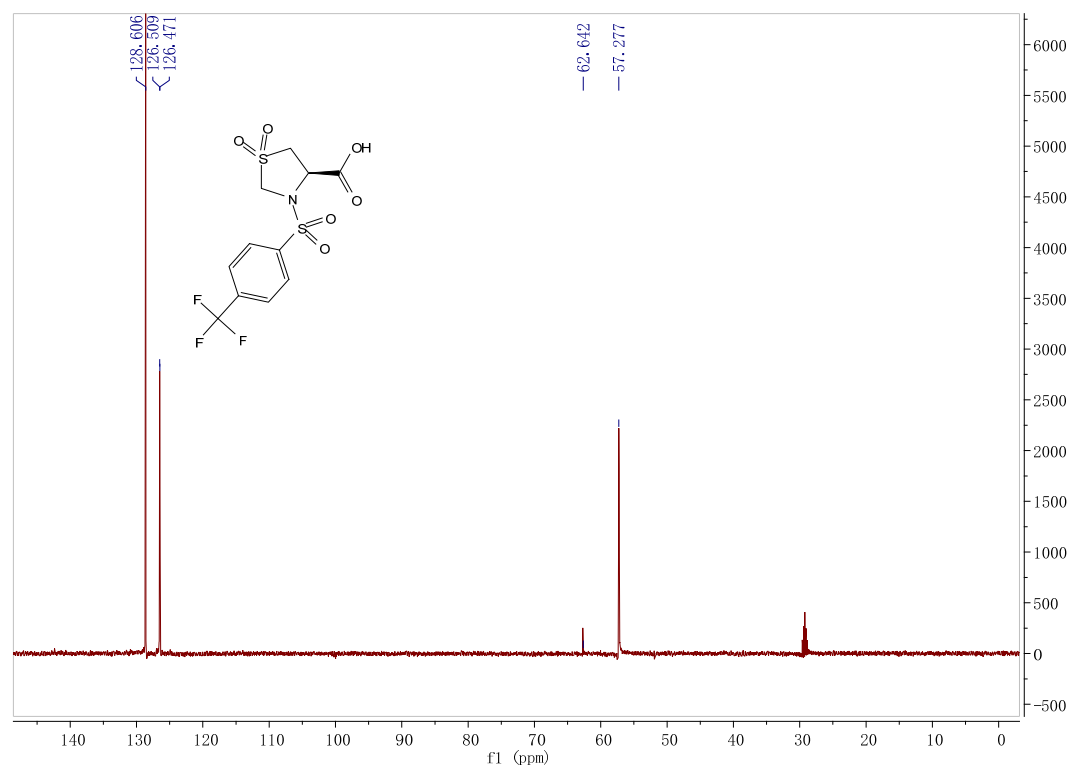

**Figure S24d:** DEPT 90 NMR (75 MHz, DMSO-d<sub>6</sub>) spectrum of **4R-TFST**

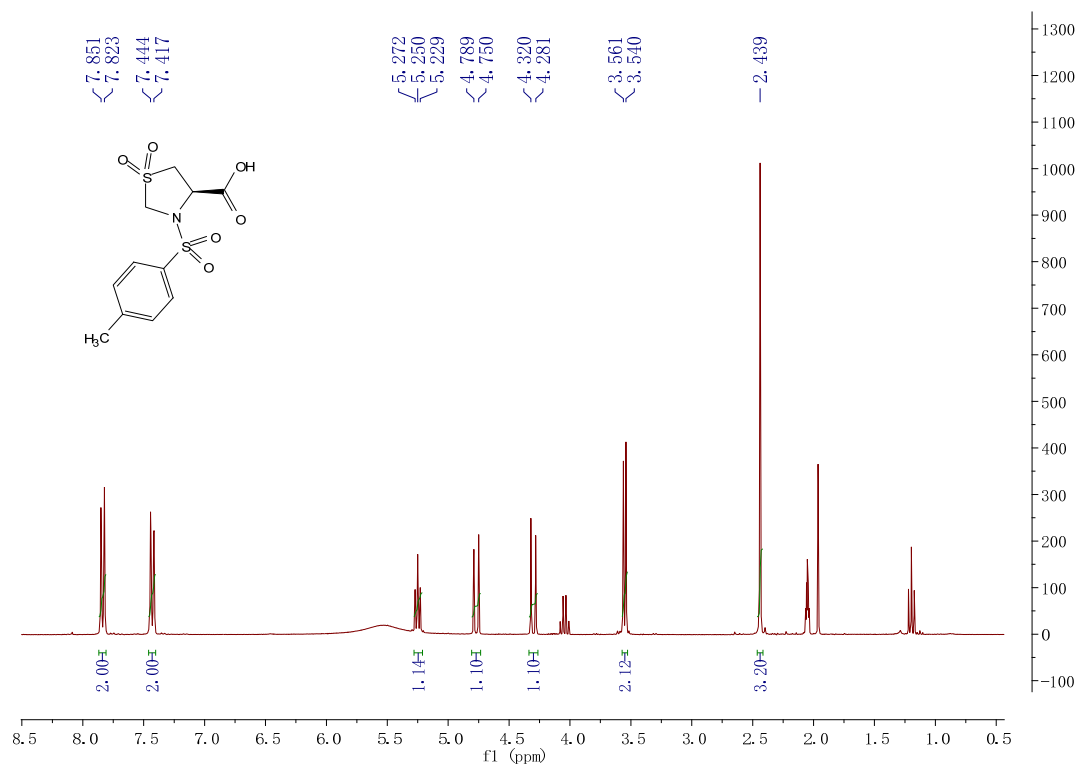

**Figure S25a:** <sup>1</sup>H NMR (300 MHz, acetone-d<sub>6</sub>) spectrum of 4R-MEST

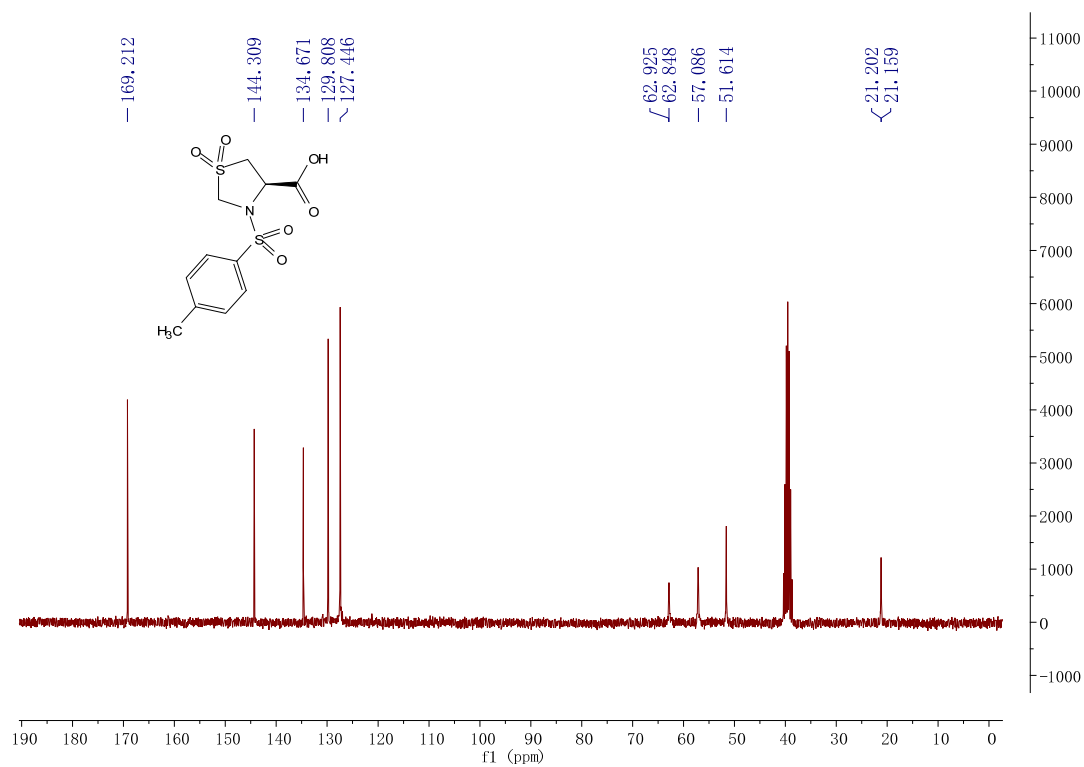

**Figure S25b:** <sup>13</sup>C NMR (75 MHz, DMSO-d<sub>6</sub>) spectrum of 4R-MEST

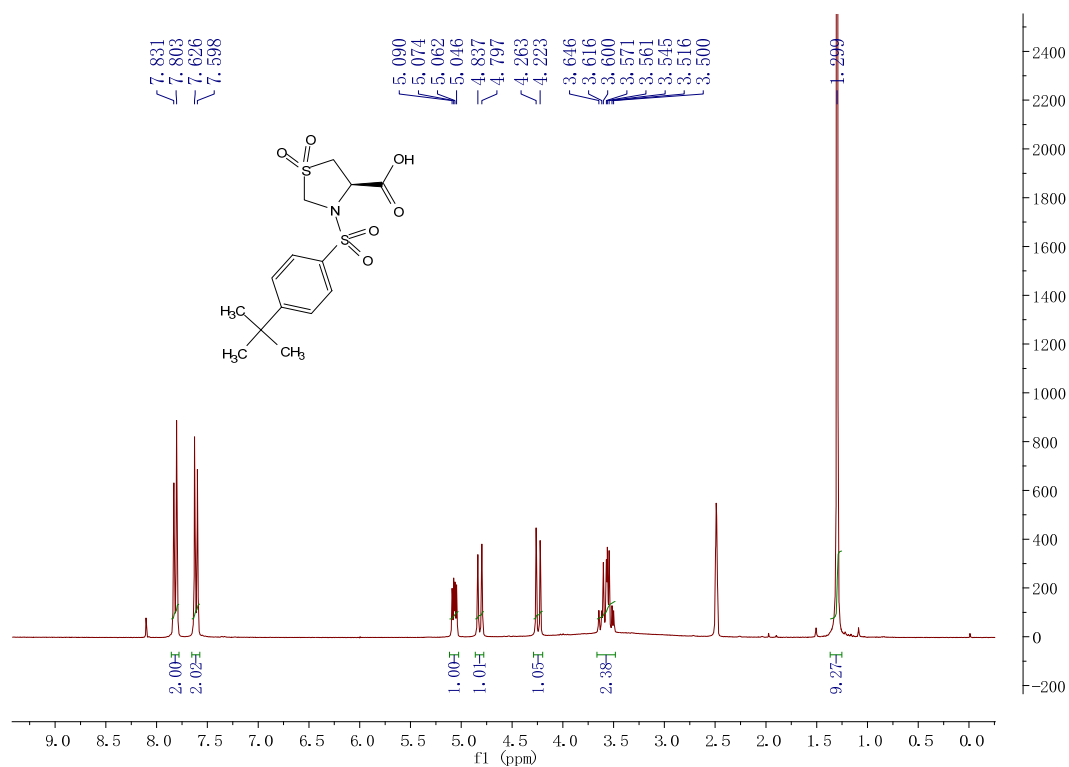

**Figure S26a:** <sup>1</sup>H NMR (300 MHz, DMSO-d<sub>6</sub>) spectrum of 4R-TBST

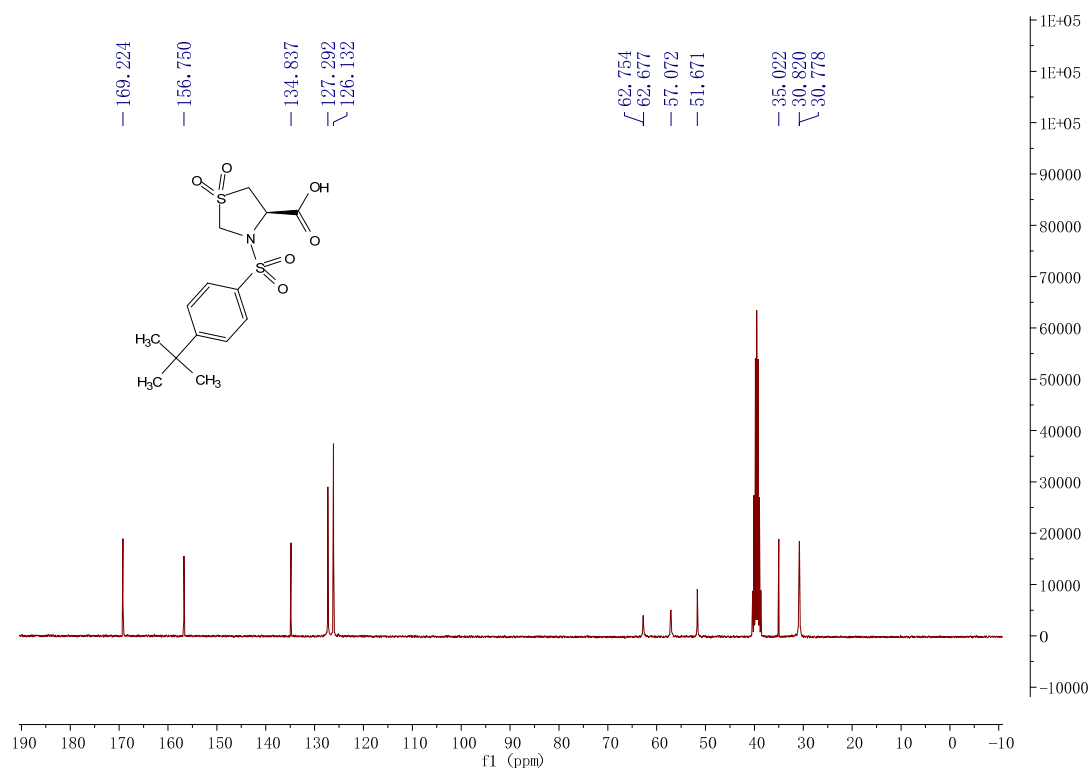

**Figure S26b:** <sup>13</sup>C NMR (75 MHz, DMSO-d<sub>6</sub>) spectrum of 4R-TBST

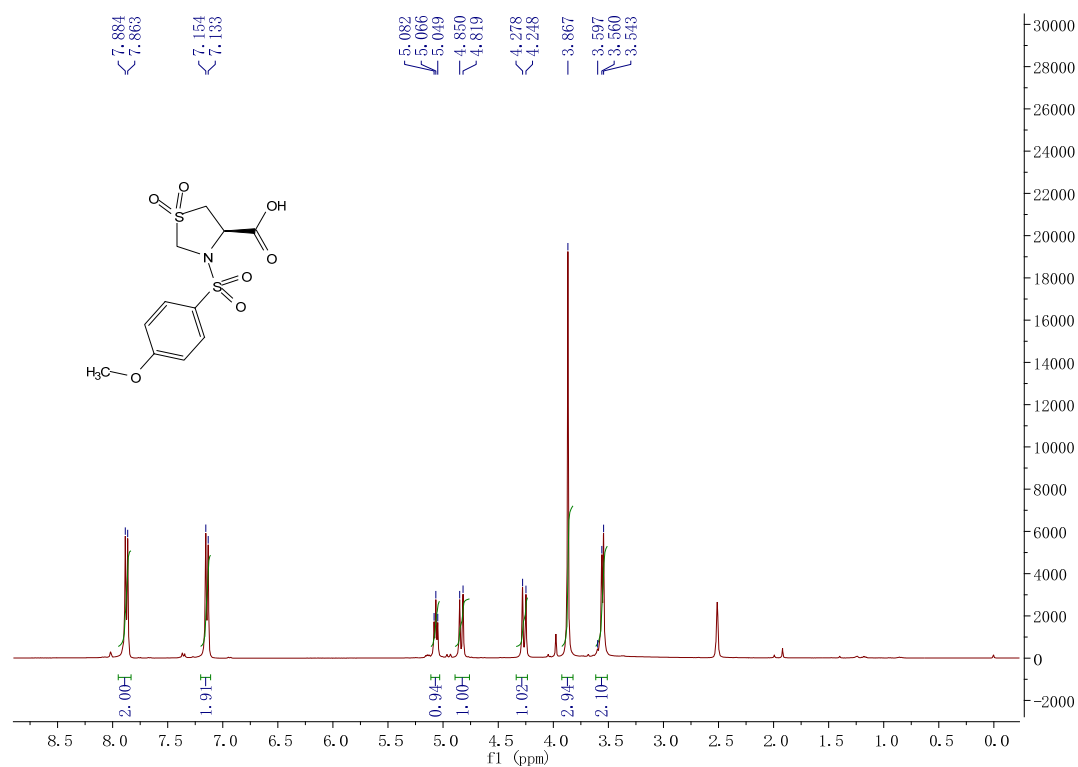

**Figure S27a:** <sup>1</sup>H NMR (400 MHz, DMSO-d<sub>6</sub>) spectrum of 4R-MOST

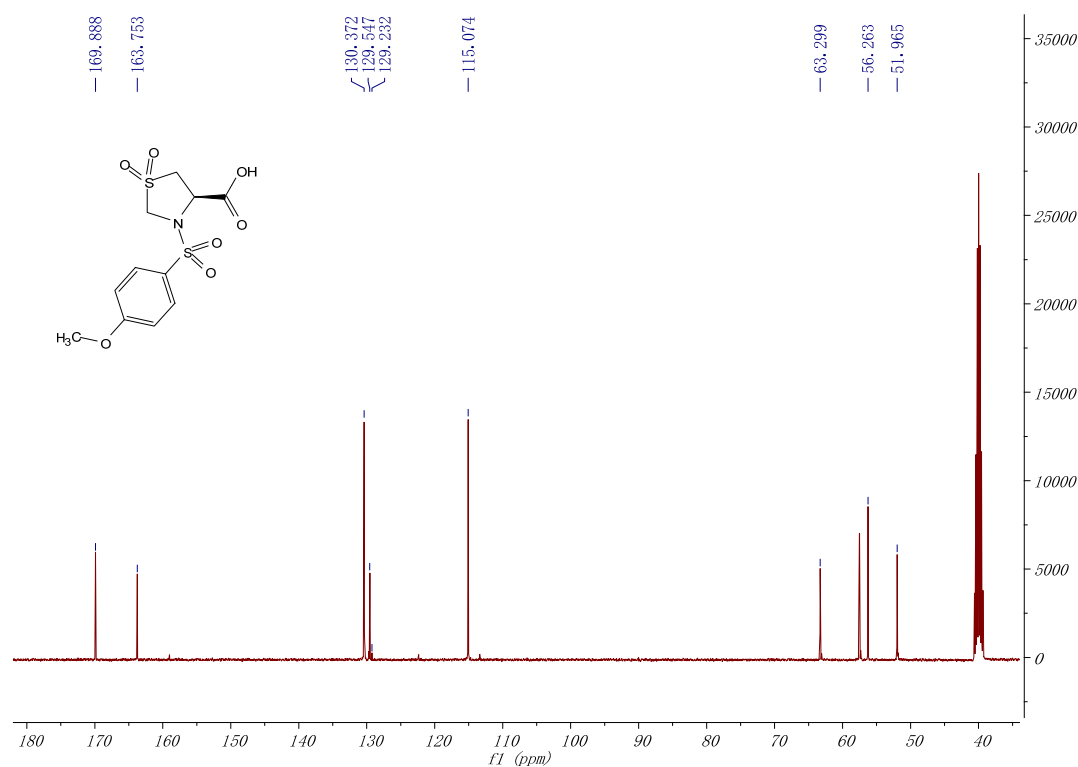

**Figure S27b:** <sup>13</sup>C NMR (100 MHz, DMSO-d<sub>6</sub>) spectrum of 4R-MOST

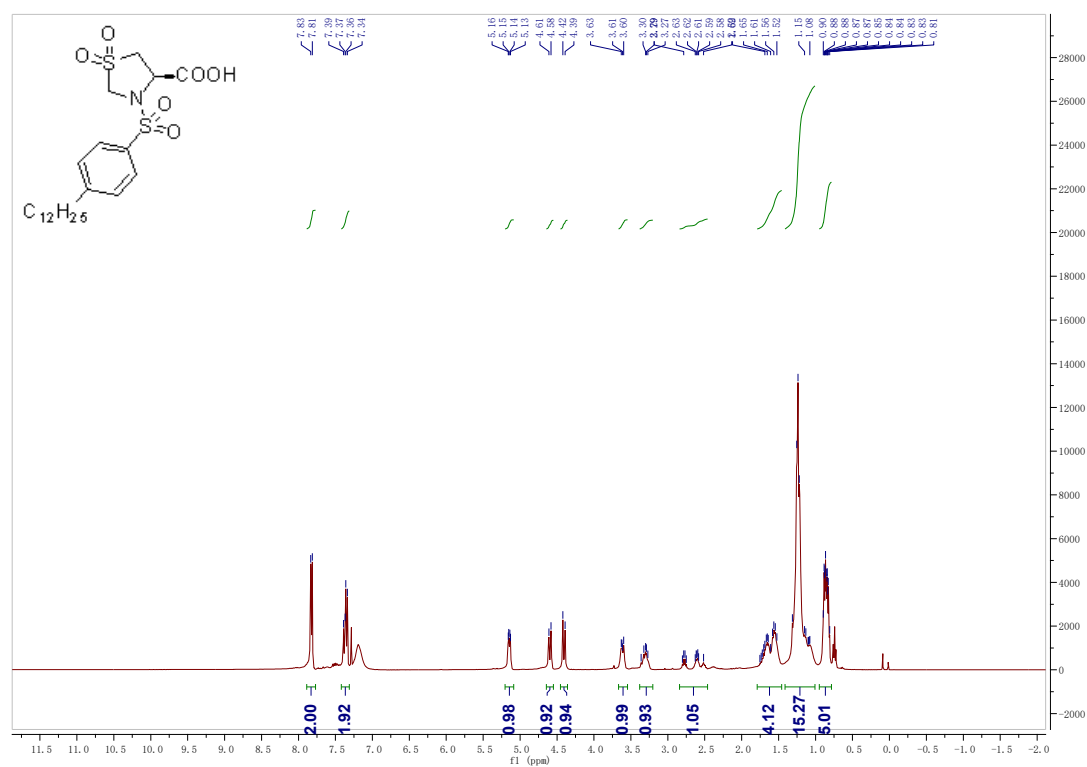

**Figure S28:** <sup>1</sup>H NMR (400 MHz, CDCl<sub>3</sub>) spectrum of **4R-DOST**

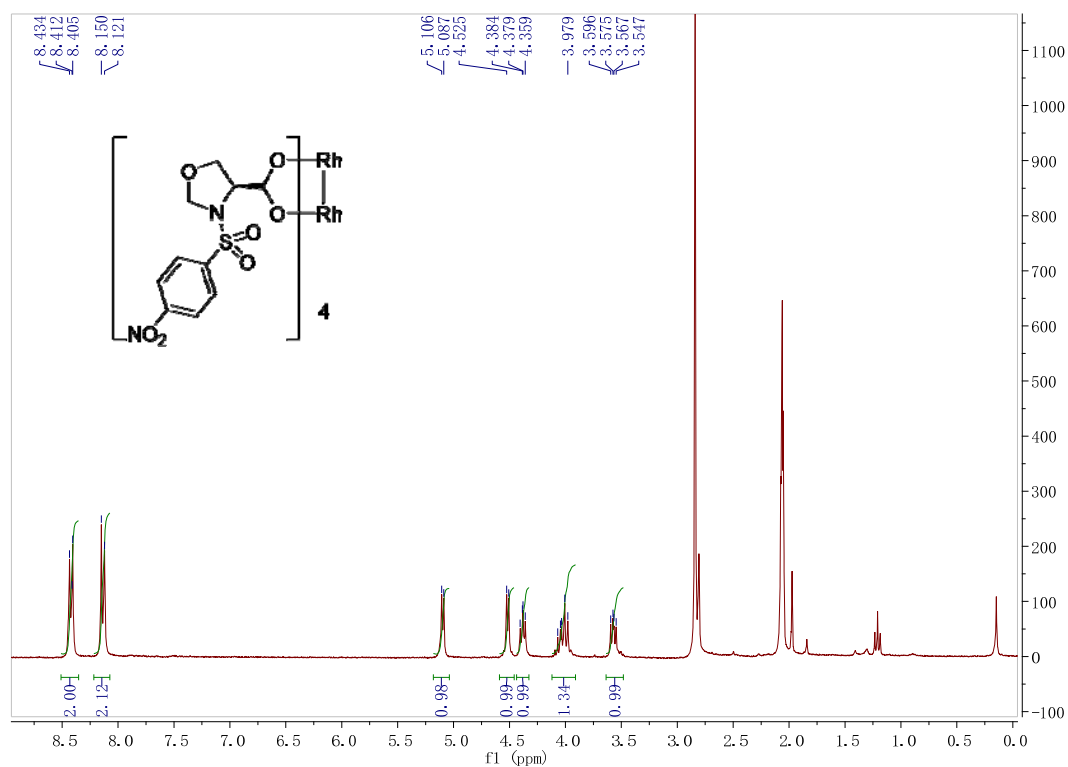

**Figure S29a:**  $^1\text{H}$  NMR (300 MHz, acetone- $\text{d}_6$ ) spectrum of  $\text{Rh}_2(4\text{S-NOSO})_4$

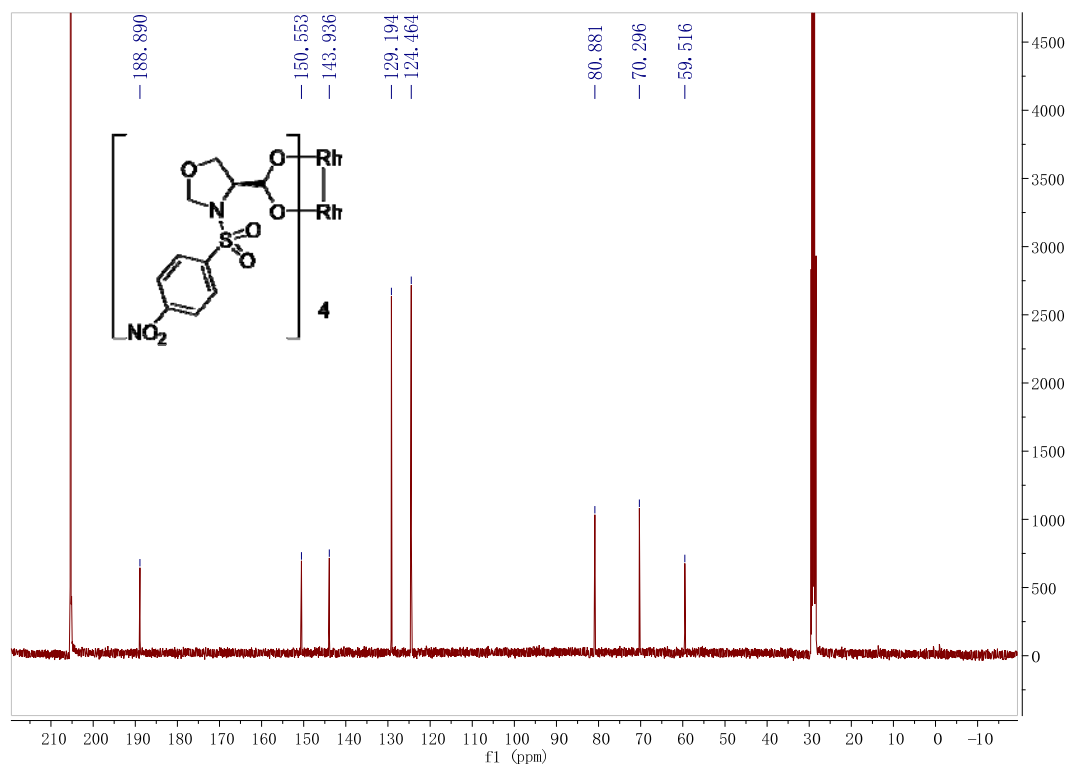

**Figure S29b:**  $^{13}\text{C}$  NMR (100 MHz, acetone- $\text{d}_6$ ) spectrum of  $\text{Rh}_2(4\text{S-NOSO})_4$

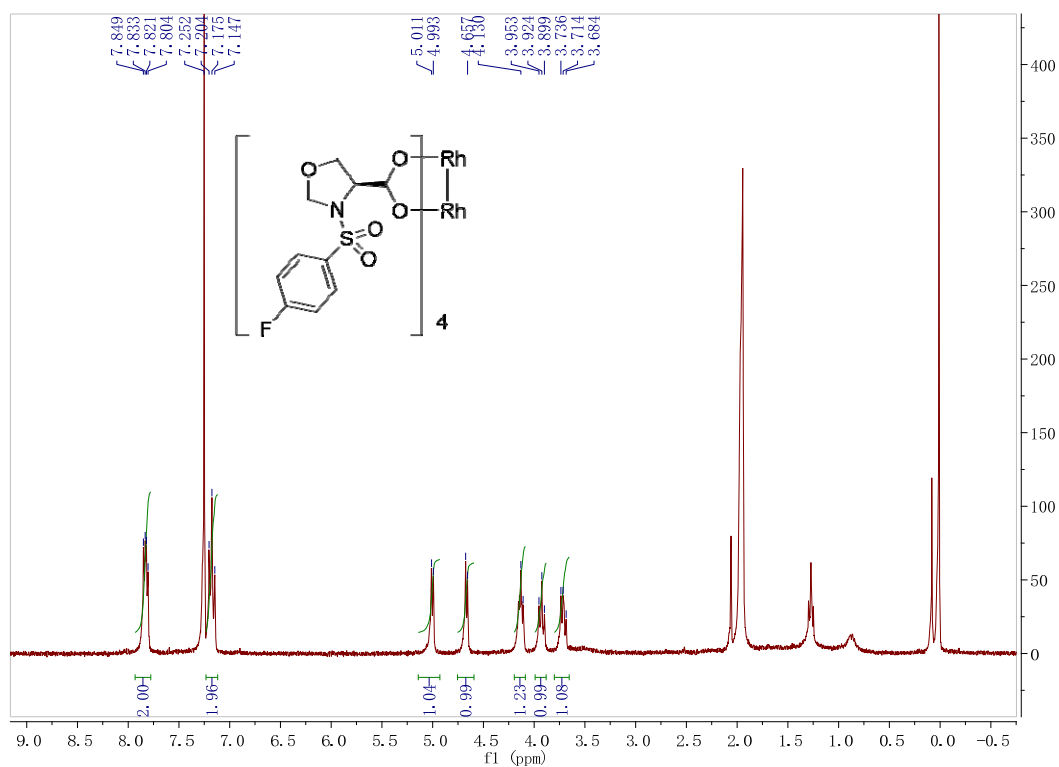

**Figure S30a:**  $^1\text{H}$  NMR (300 MHz,  $\text{CDCl}_3$ ) spectrum of  $\text{Rh}_2(4\text{S-FLSO})_4$

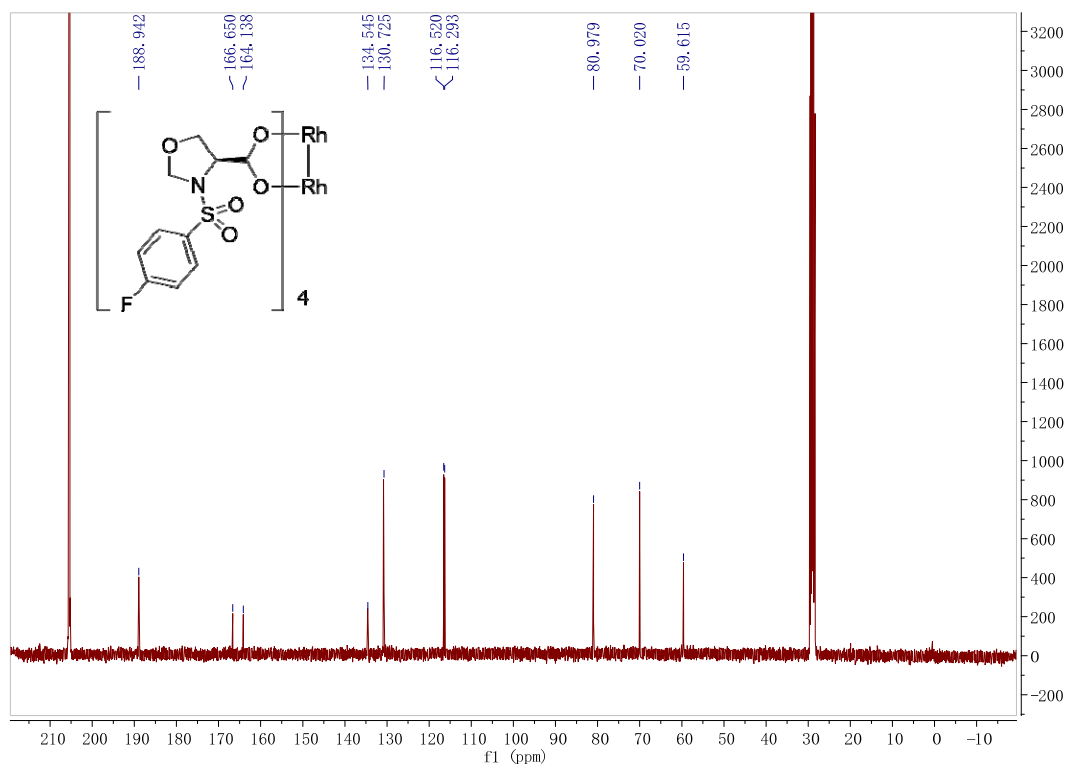

**Figure S30b:**  $^{13}\text{C}$  NMR (100 MHz,  $\text{acetone-d}_6$ ) spectrum of  $\text{Rh}_2(4\text{S-FLSO})_4$

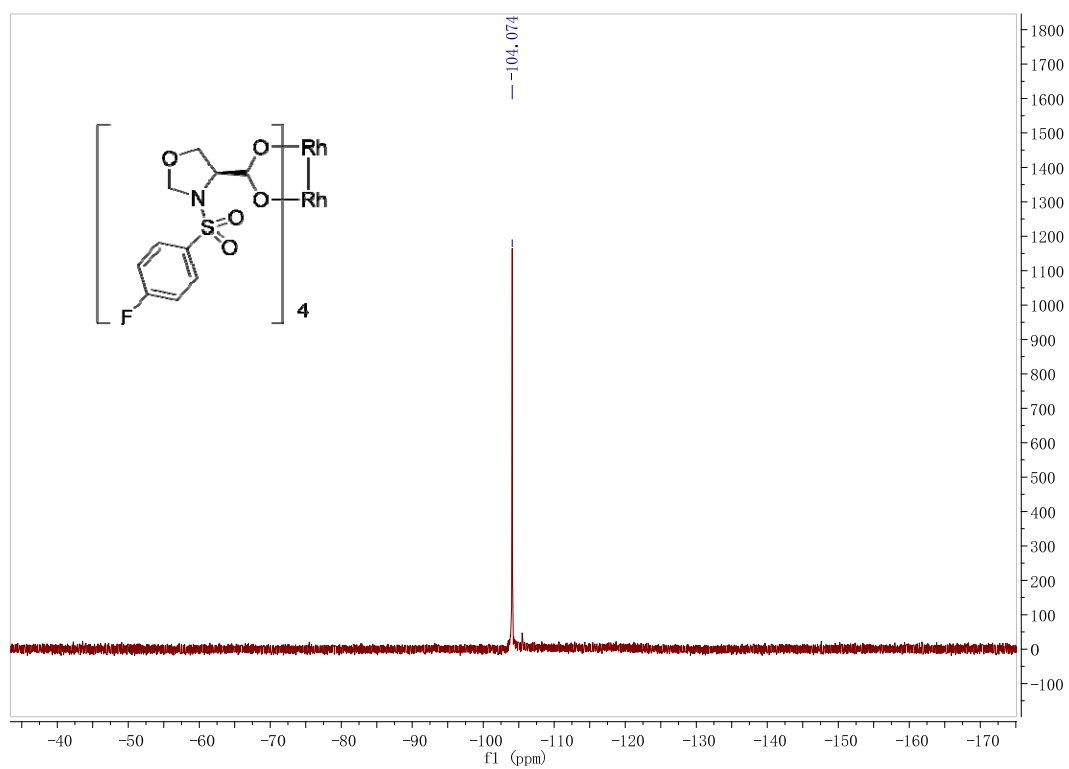

**Figure S30c:**  $^{19}\text{F}$  NMR (282 MHz,  $\text{CDCl}_3$ ) spectrum of  $\text{Rh}_2(4\text{S-FLSO})_4$

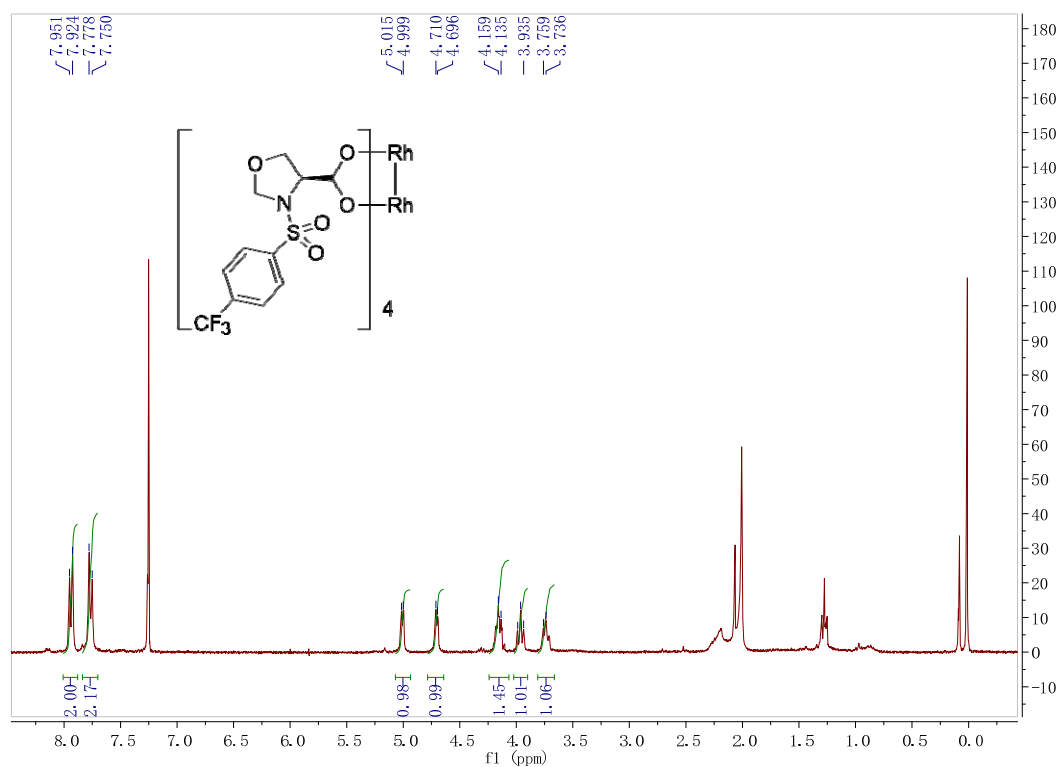

**Figure S31a:**  $^1\text{H}$  NMR (300 MHz,  $\text{CDCl}_3$ ) spectrum of  $\text{Rh}_2(4\text{S-TFSO})_4$

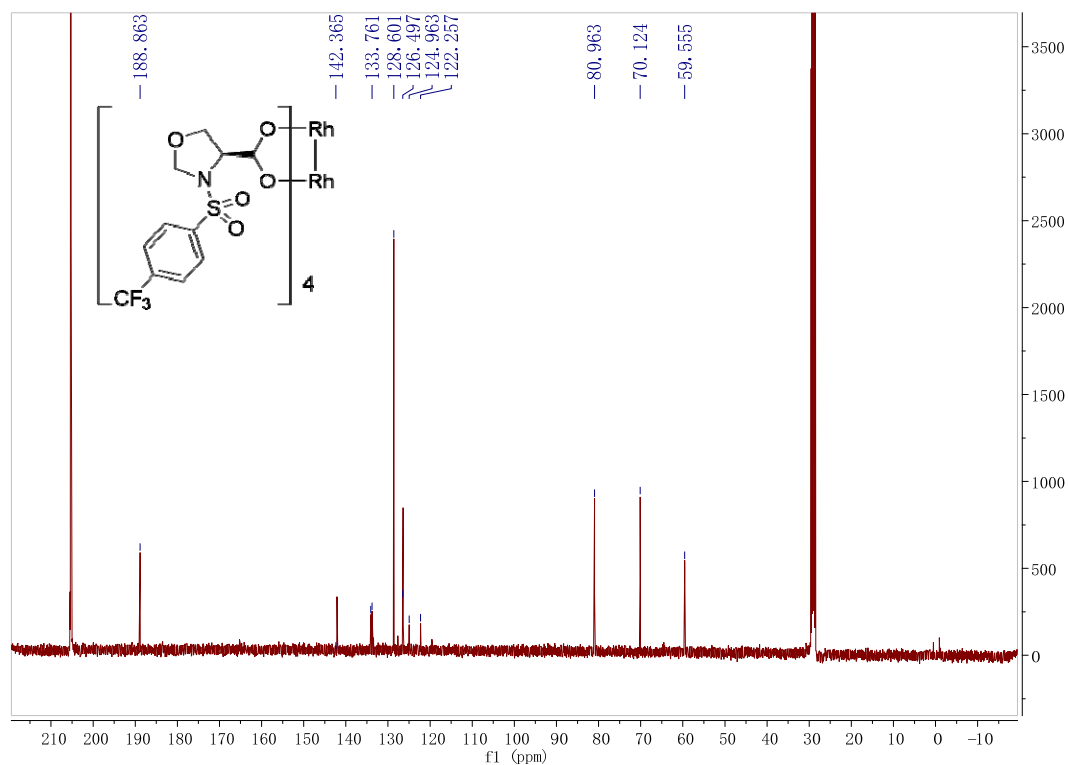

**Figure S31b:**  $^{13}\text{C}$  NMR (100 MHz,  $\text{acetone-d}_6$ ) spectrum of  $\text{Rh}_2(4\text{S-TFSO})_4$

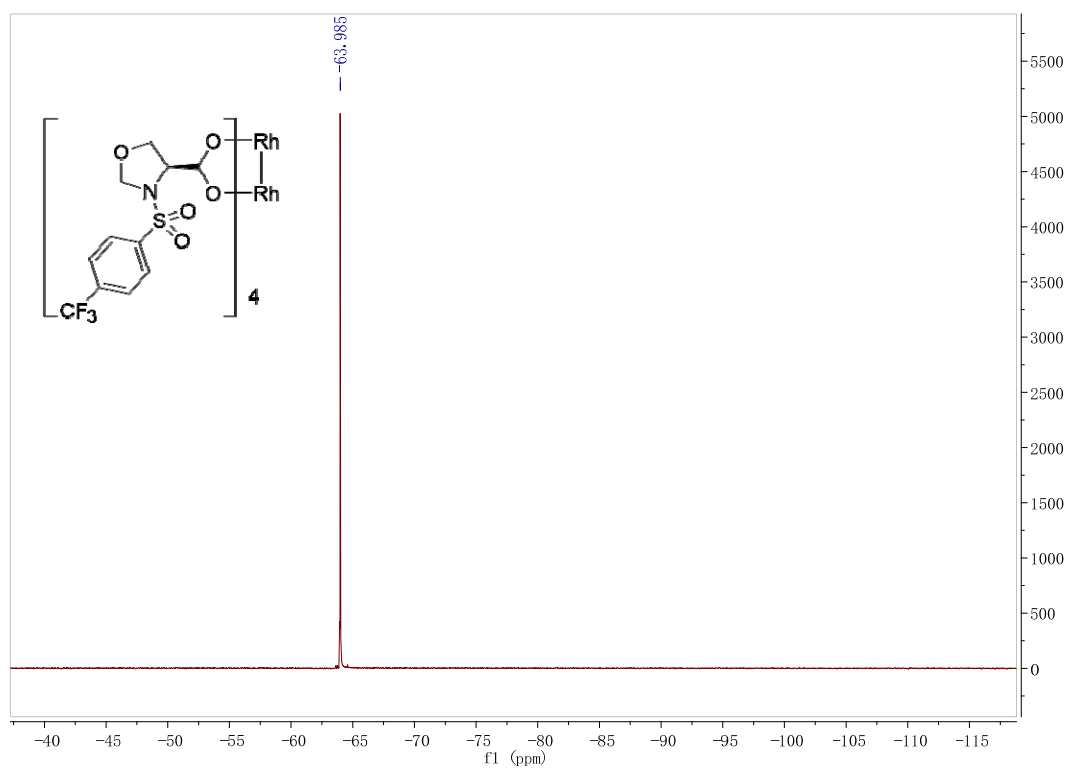

**Figure S31c:**  $^{19}\text{F}$  NMR (282 MHz,  $\text{CDCl}_3$ ) spectrum of  $\text{Rh}_2(4\text{S-TFSO})_4$

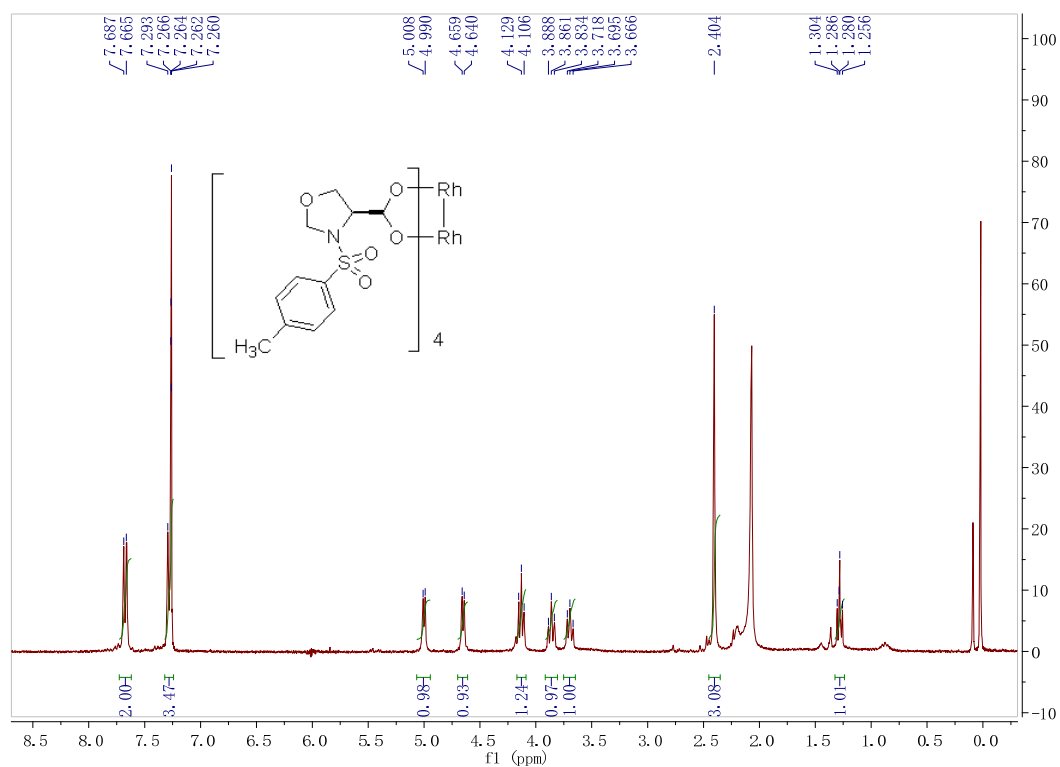

**Figure S32a:**  $^1\text{H}$  NMR (300 MHz,  $\text{CDCl}_3$ ) spectrum of  $\text{Rh}_2(4\text{S-MESO})_4$

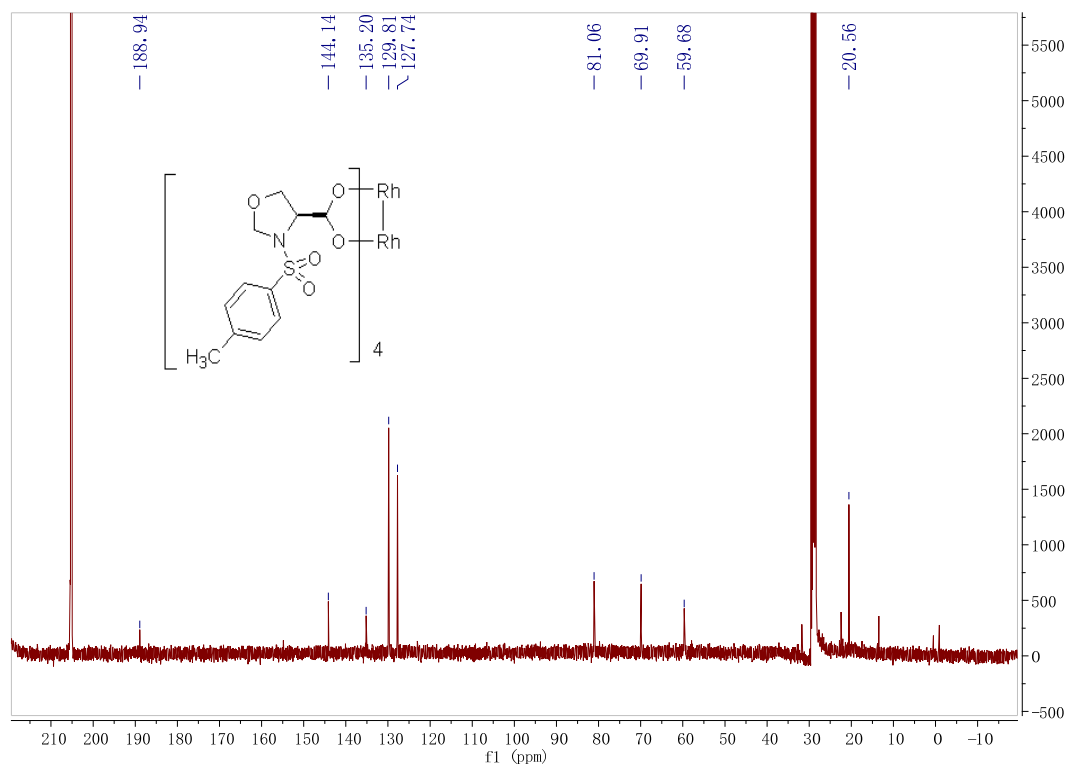

**Figure S32b:**  $^{13}\text{C}$  NMR (100 MHz,  $\text{acetone-d}_6$ ) spectrum of  $\text{Rh}_2(4\text{S-MESO})_4$

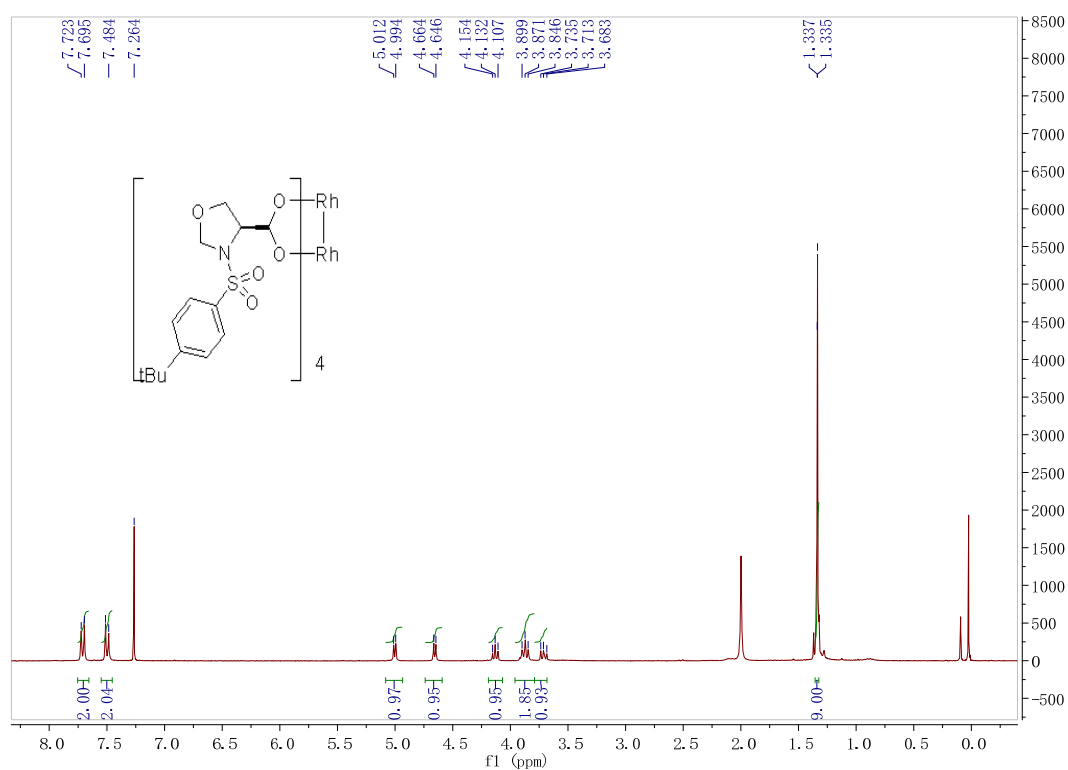

**Figure S33a:**  $^1\text{H}$  NMR (300 MHz,  $\text{CDCl}_3$ ) spectrum of  $\text{Rh}_2(4\text{S-TBSO})_4$

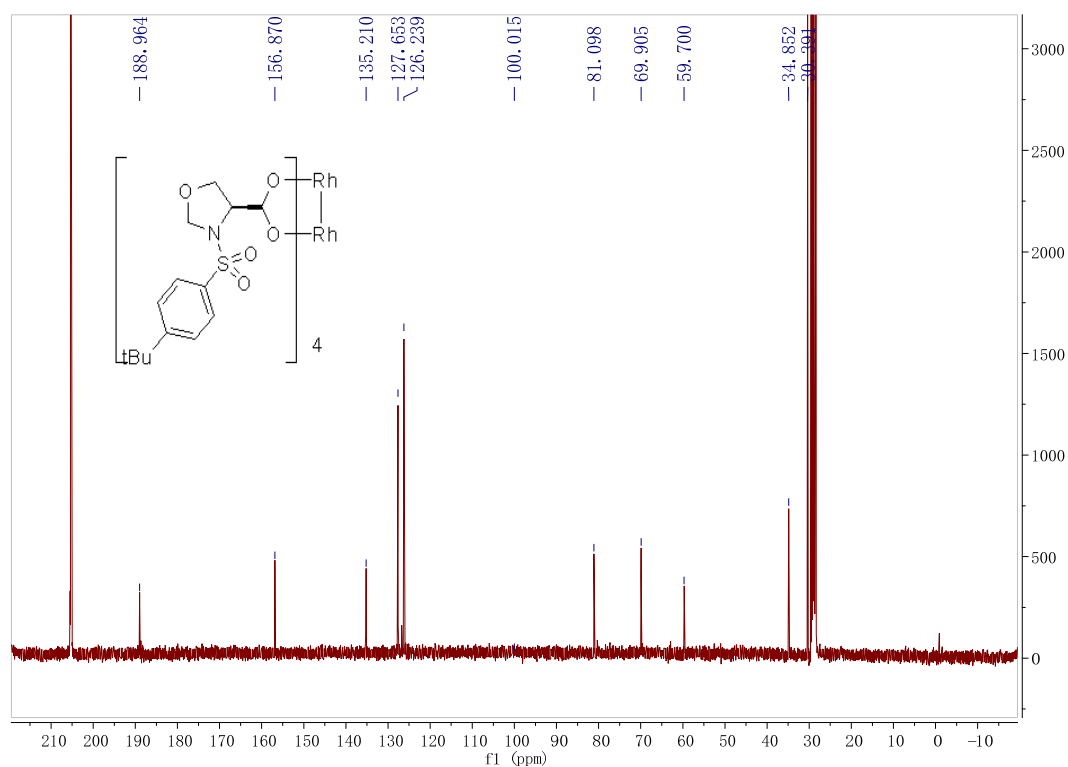

**Figure S33b:**  $^{13}\text{C}$  NMR (100 MHz,  $\text{acetone-d}_6$ ) spectrum of  $\text{Rh}_2(4\text{S-TBSO})_4$

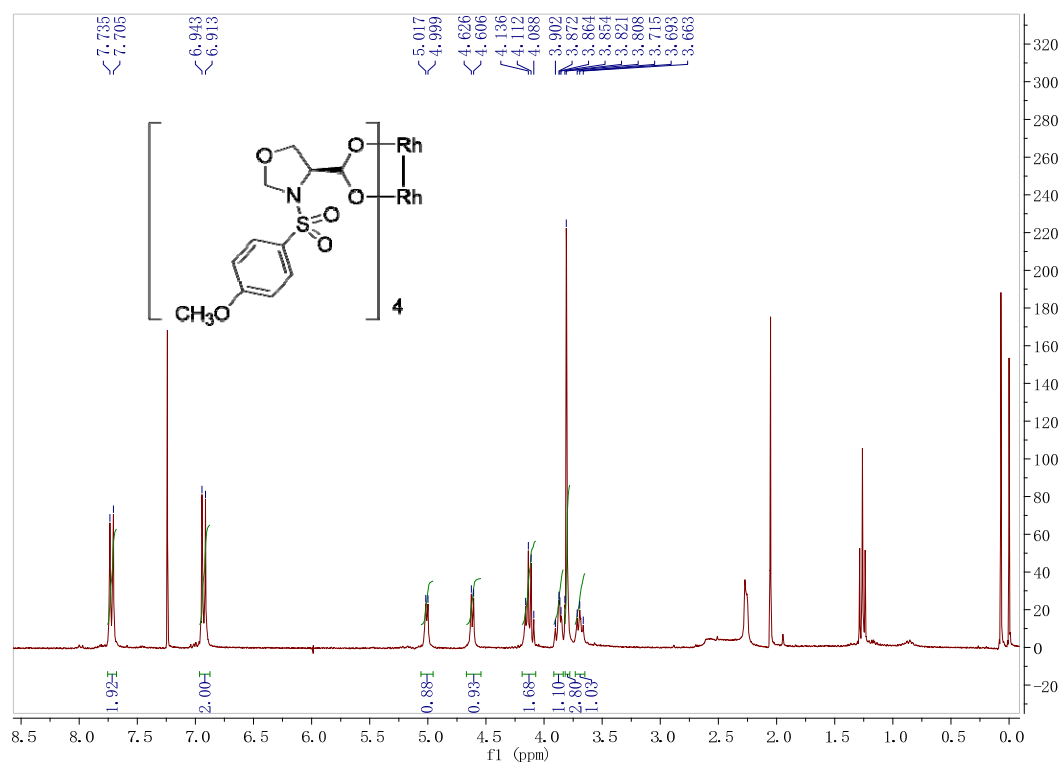

**Figure S34a:**  $^1\text{H}$  NMR (300 MHz,  $\text{CDCl}_3$ ) spectrum of  $\text{Rh}_2(4\text{S-MOSO})_4$

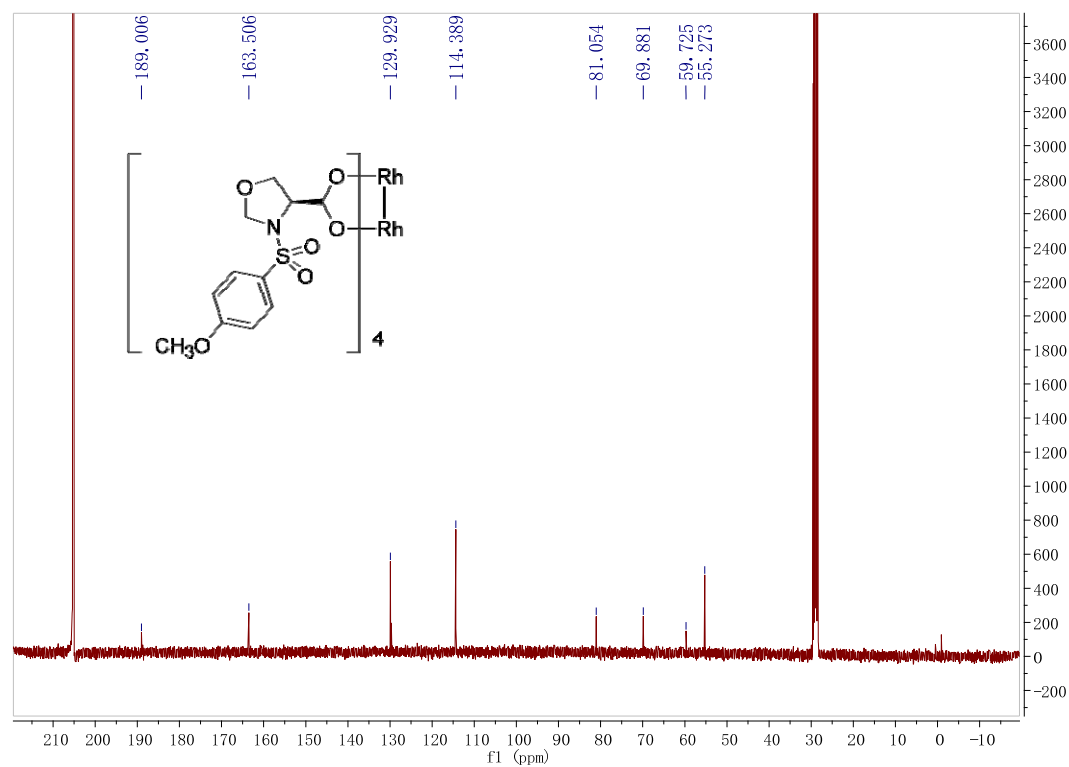

**Figure S34b:**  $^{13}\text{C}$  NMR (100 MHz,  $\text{acetone-d}_6$ ) spectrum of  $\text{Rh}_2(4\text{S-MOSO})_4$

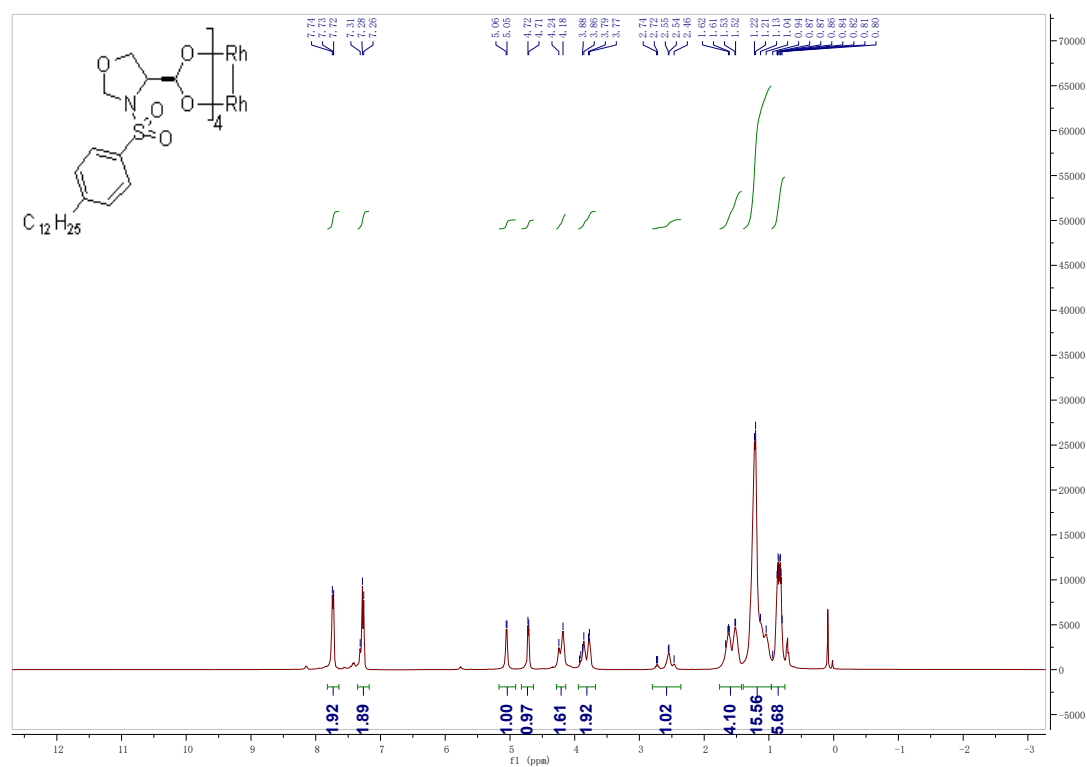

**Figure S35a:**  $^1\text{H}$  NMR (400 MHz,  $\text{CDCl}_3$ ) spectrum of  $\text{Rh}_2(4\text{S-DOSO})_4$

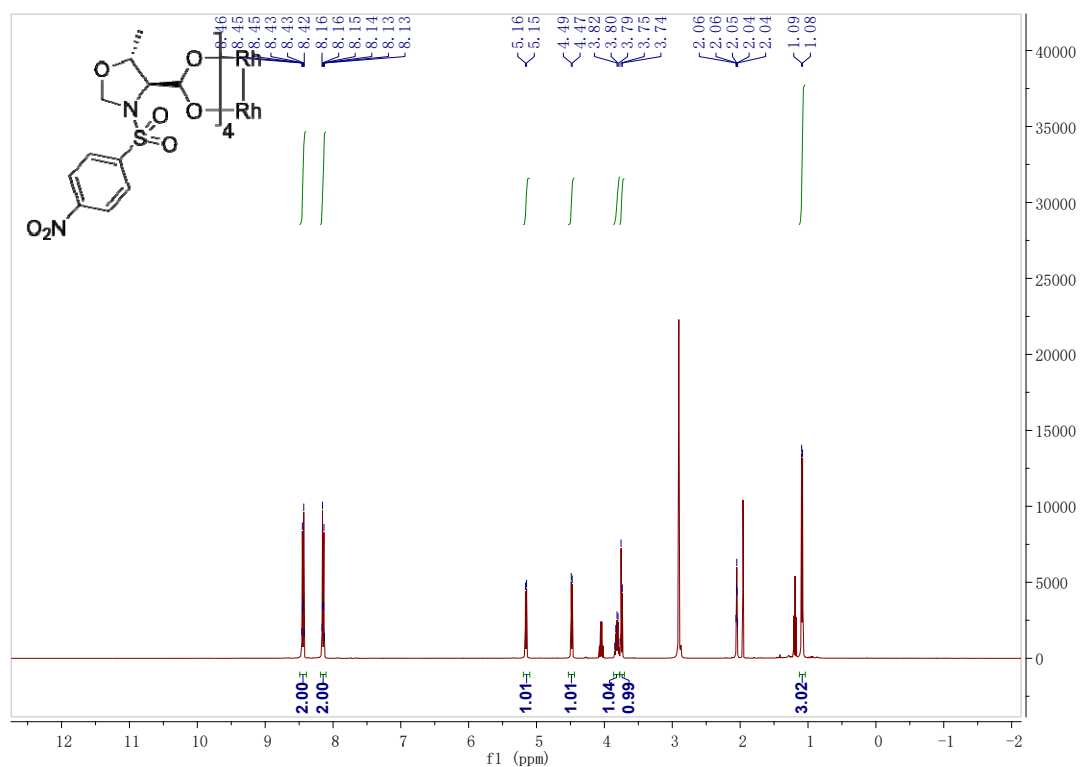

**Figure S36a:**  $^1\text{H}$  NMR (400 MHz, acetone-d<sub>6</sub>) spectrum of  $\text{Rh}_2(4S,5R\text{-MNOSO})_4$

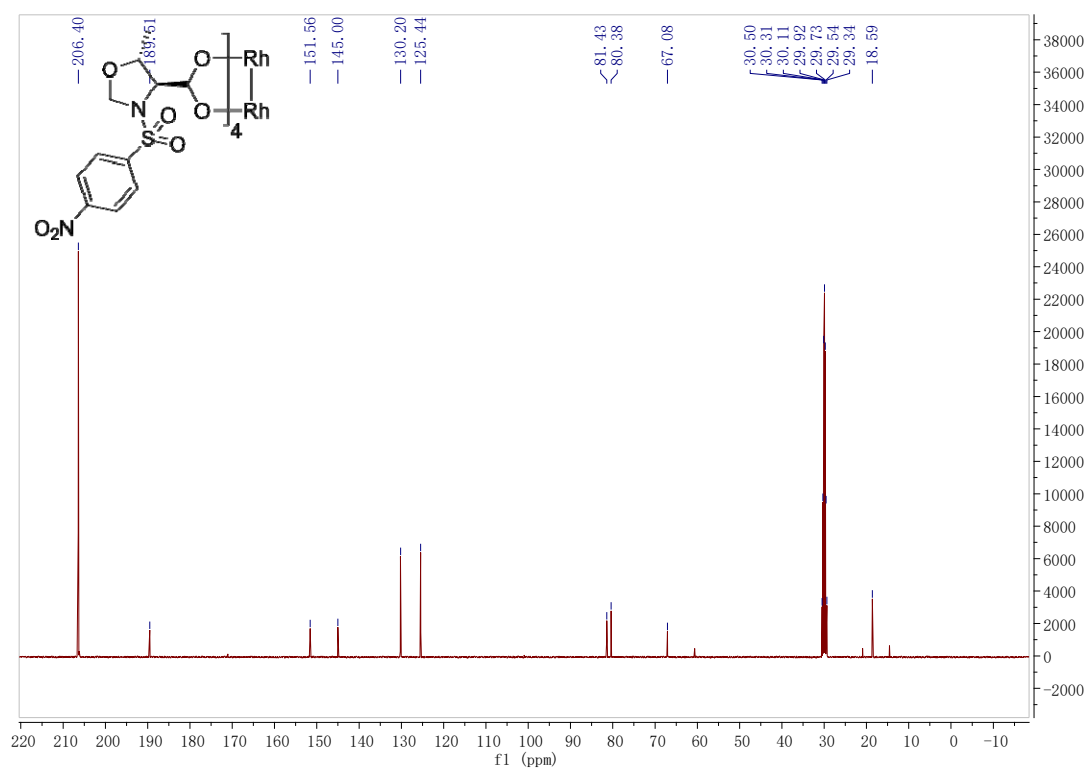

**Figure S36b:**  $^{13}\text{C}$  NMR (100 MHz, acetone-d<sub>6</sub>) spectrum of  $\text{Rh}_2(4S,5R\text{-MNOSO})_4$

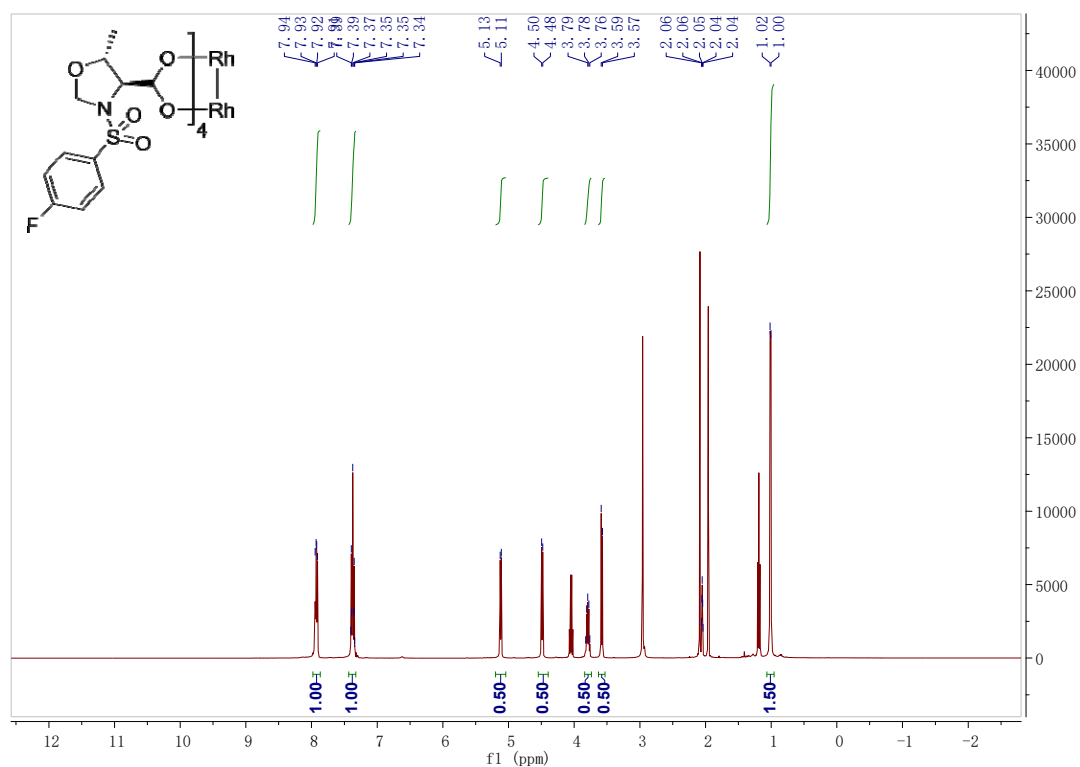

**Figure S37a:**  $^1\text{H}$  NMR (400 MHz,  $\text{acetone-d}_6$ ) spectrum of  $\text{Rh}_2(4S,5R\text{-MFLSO})_4$

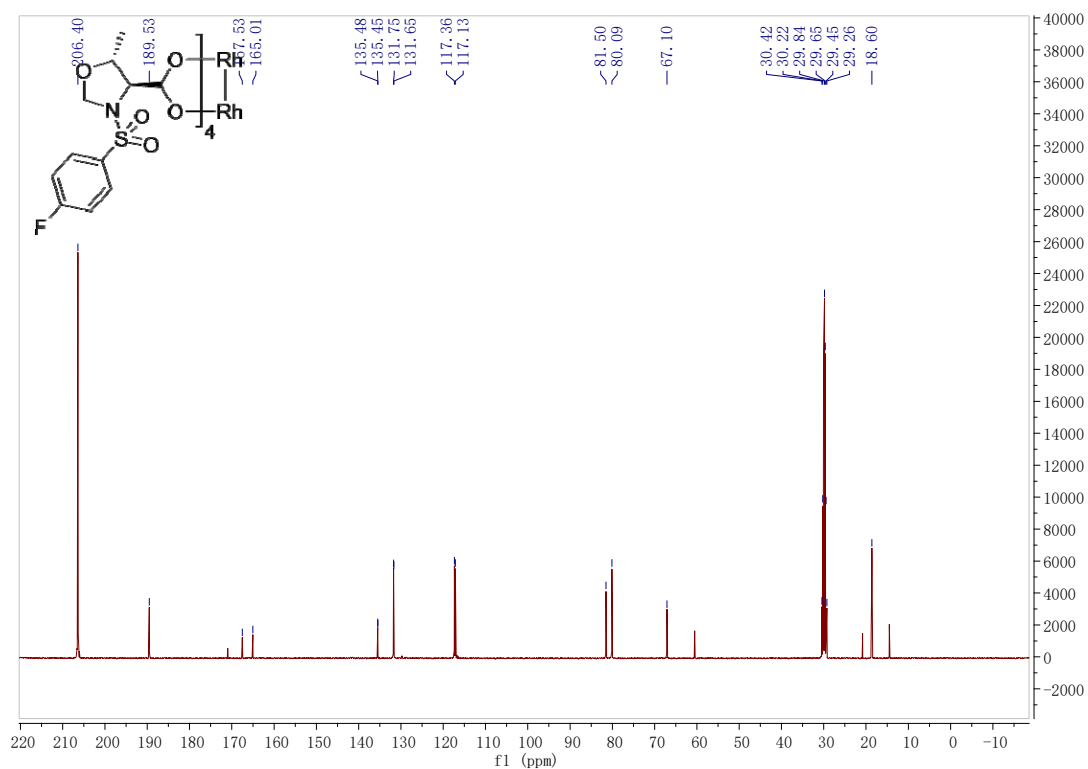

**Figure S37b:**  $^{13}\text{C}$  NMR (100 MHz,  $\text{acetone-d}_6$ ) spectrum of  $\text{Rh}_2(4S,5R\text{-MFLSO})_4$

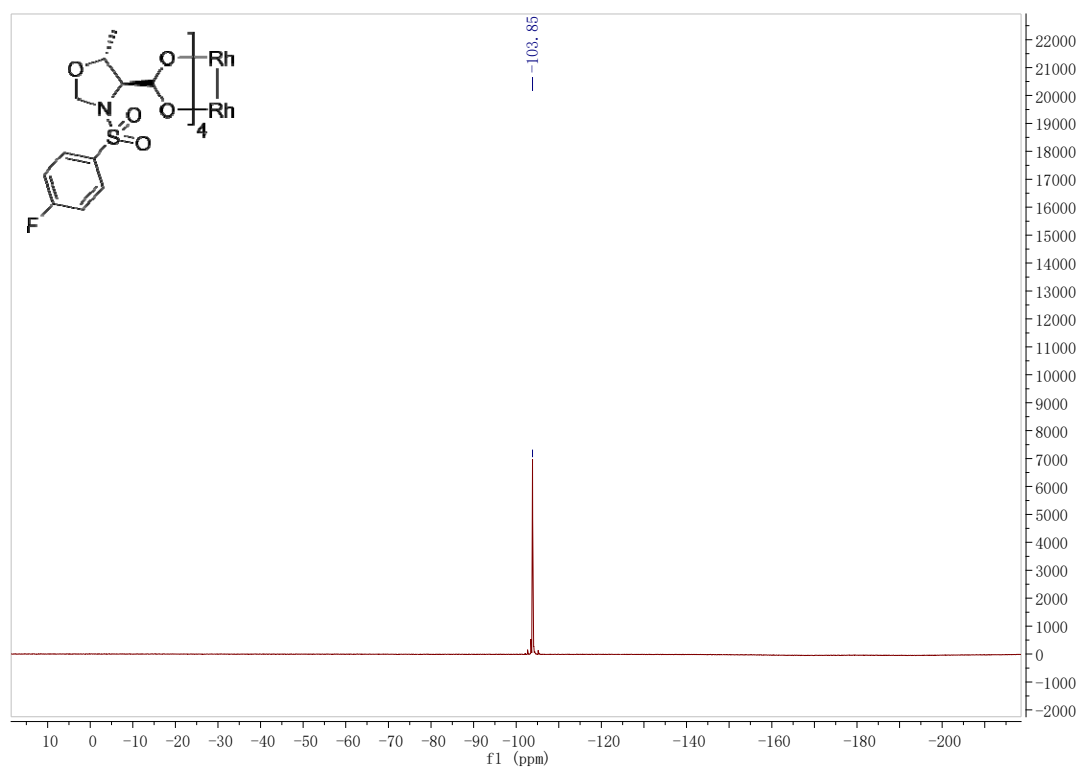

**Figure S37c:**  $^{19}\text{F}$  NMR (377 MHz, acetone- $\text{d}_6$ ) spectrum of  $\text{Rh}_2(4S,5R\text{-MFLSO})_4$



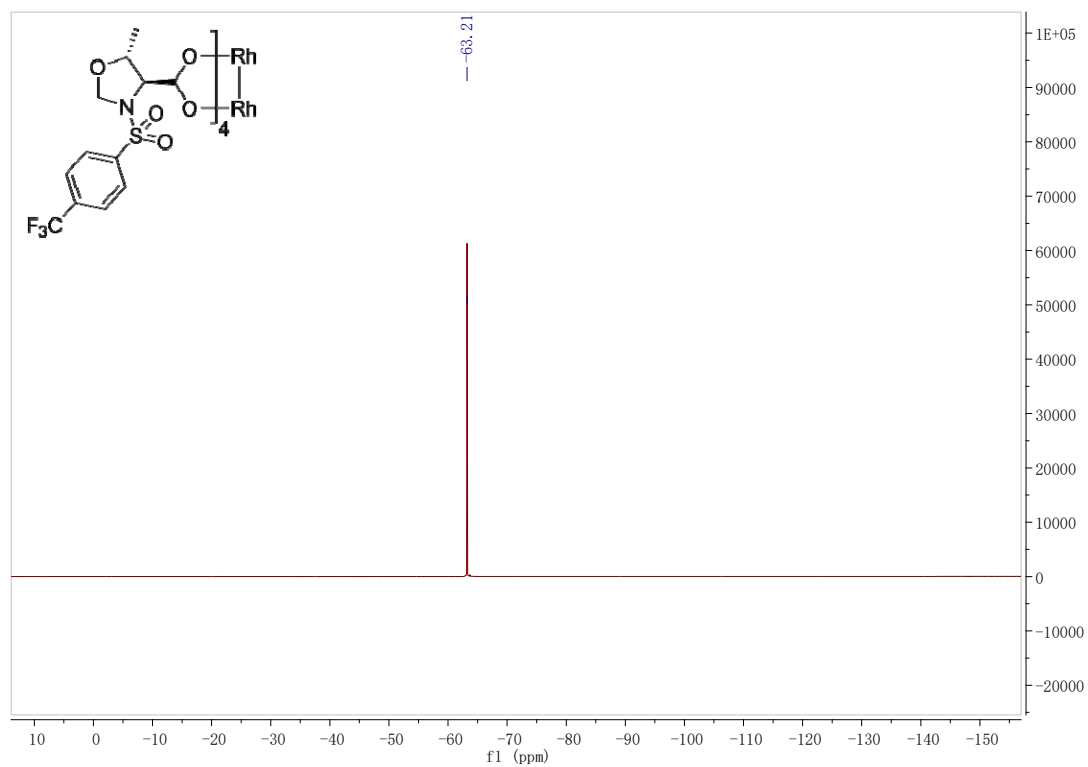

**Figure S38c:**  $^{19}\text{F}$  NMR (377 MHz,  $\text{CDCl}_3$ ) spectrum of  $\text{Rh}_2(4S,5R\text{-MTFSO})_4$

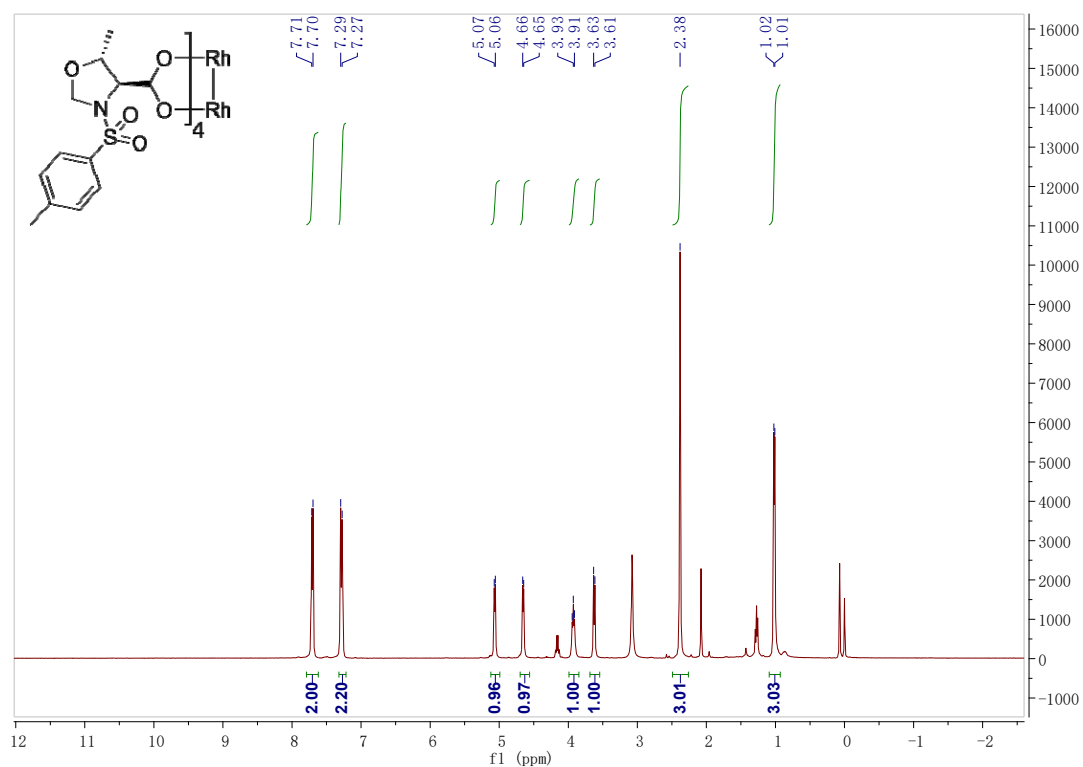

**Figure S39a:**  $^1\text{H}$  NMR (400 MHz,  $\text{CDCl}_3$ ) spectrum of  $\text{Rh}_2(4S,5R\text{-MMESO})_4$

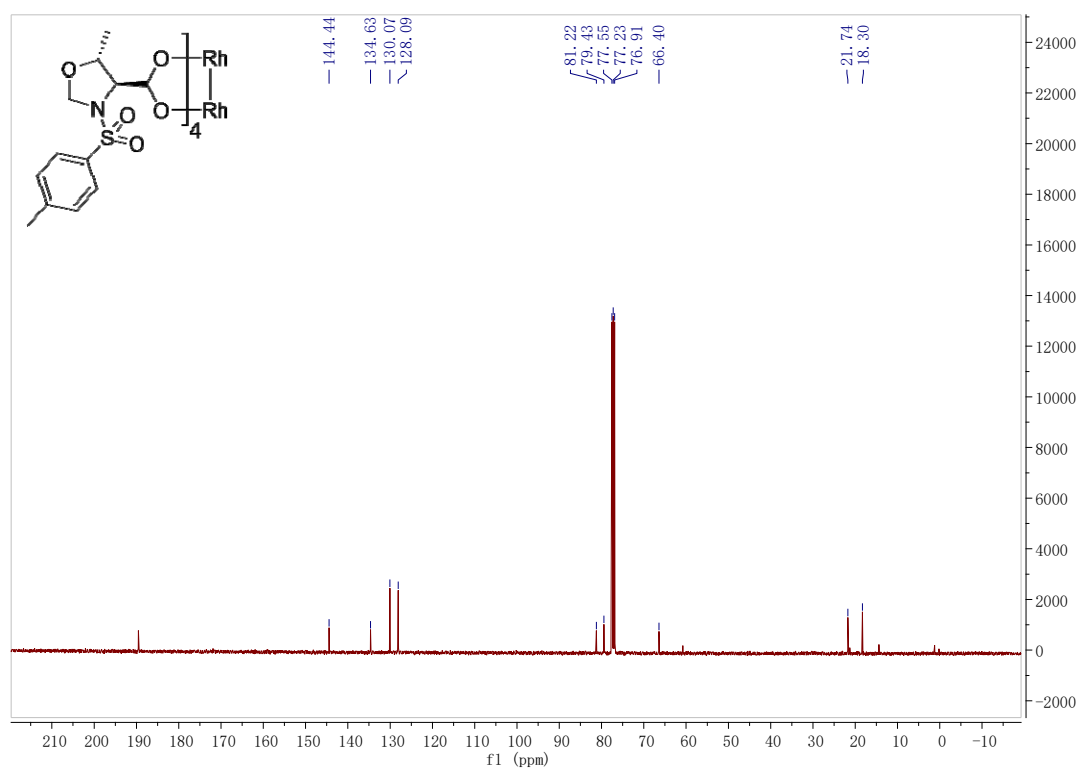

**Figure S39b:**  $^{13}\text{C}$  NMR (100 MHz,  $\text{CDCl}_3$ ) spectrum of  $\text{Rh}_2(4S,5R\text{-MMESO})_4$

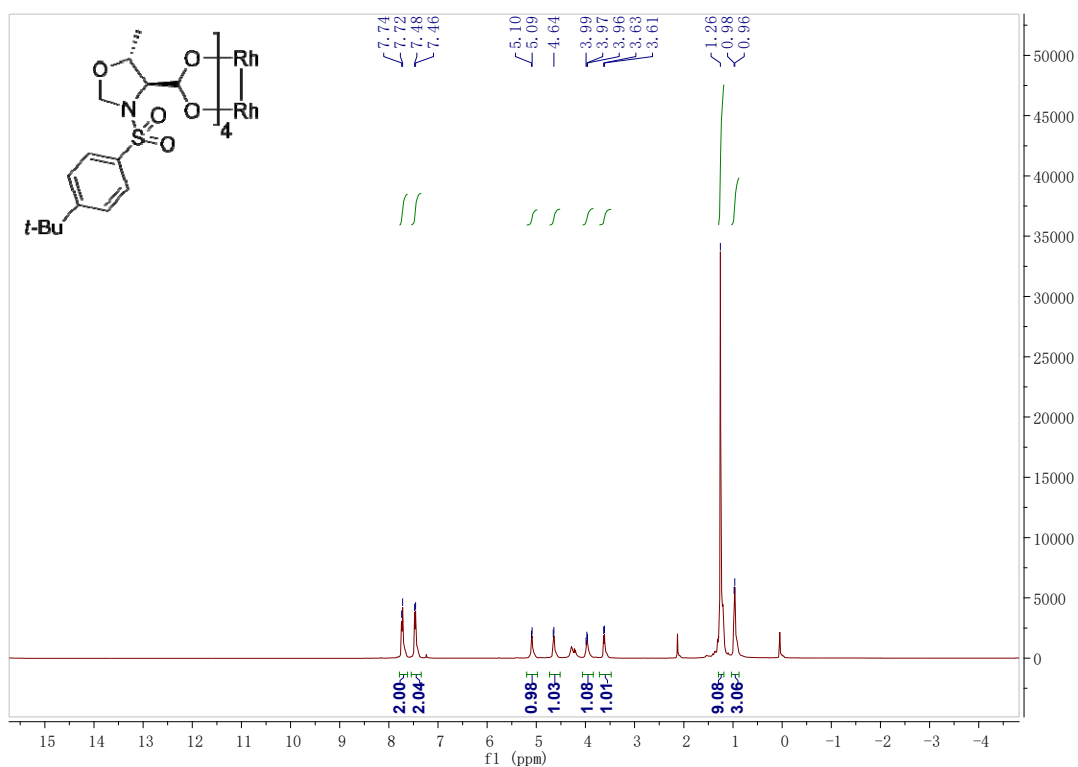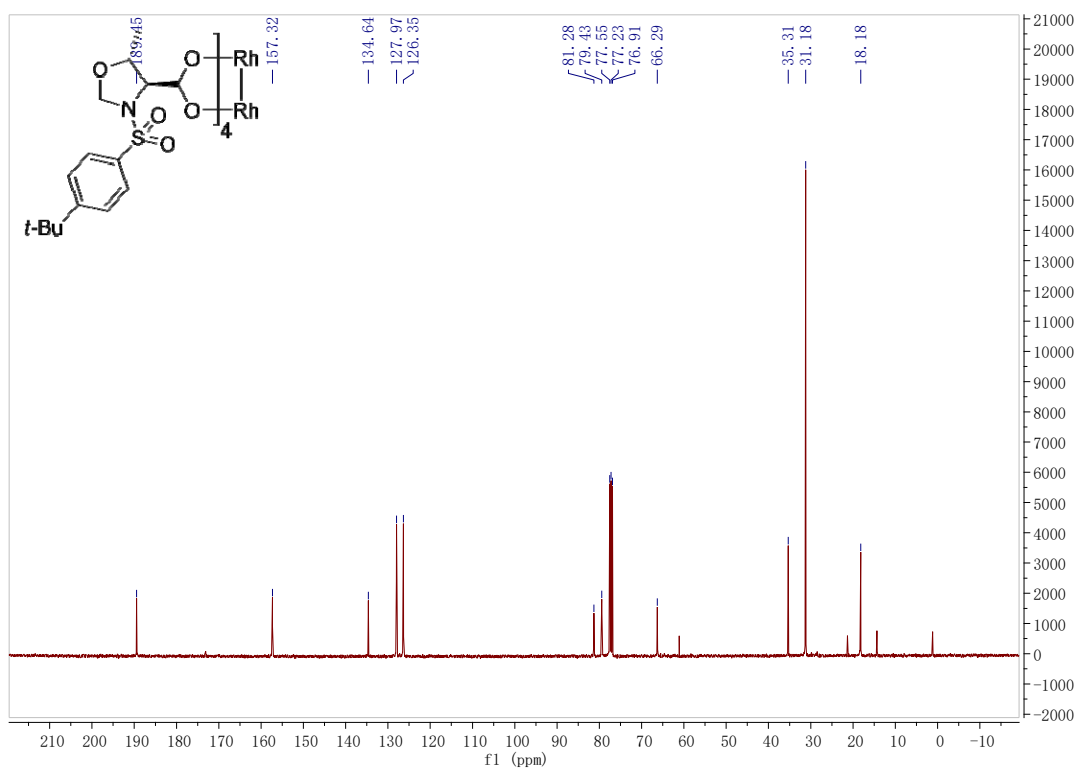

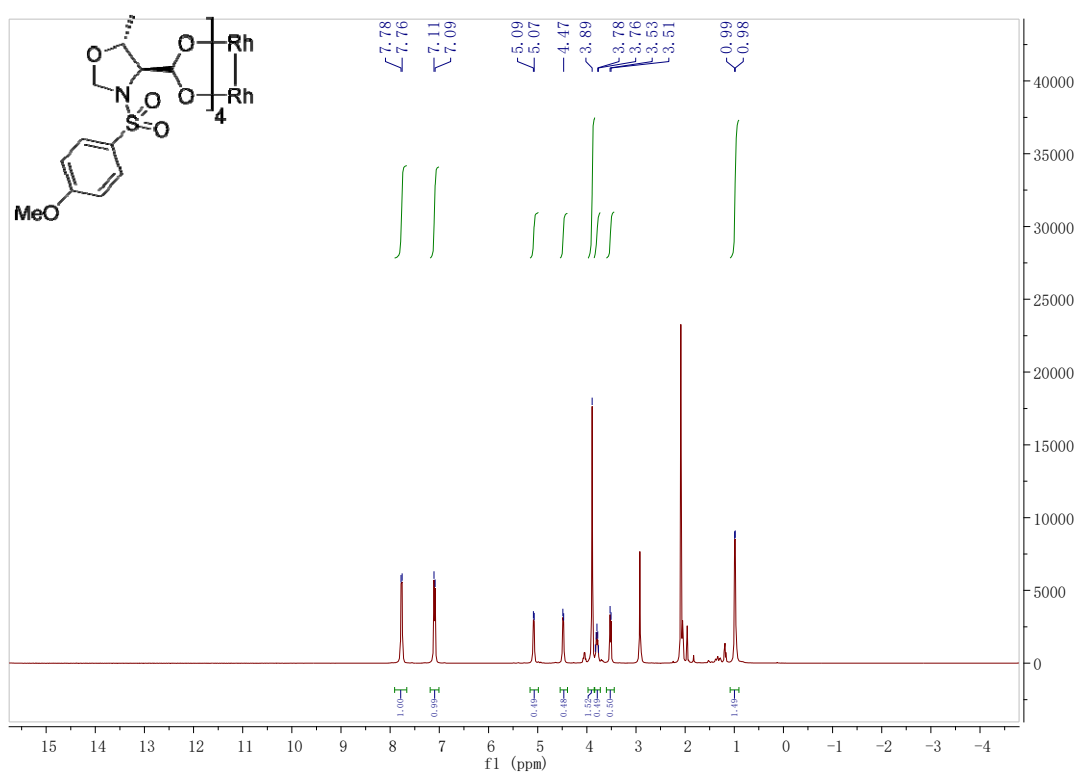

**Figure S41a:** <sup>1</sup>H NMR (100 MHz, acetone-d<sub>6</sub>) spectrum of **Rh<sub>2</sub>(4*S*,5*R*-MMOSO)<sub>4</sub>**

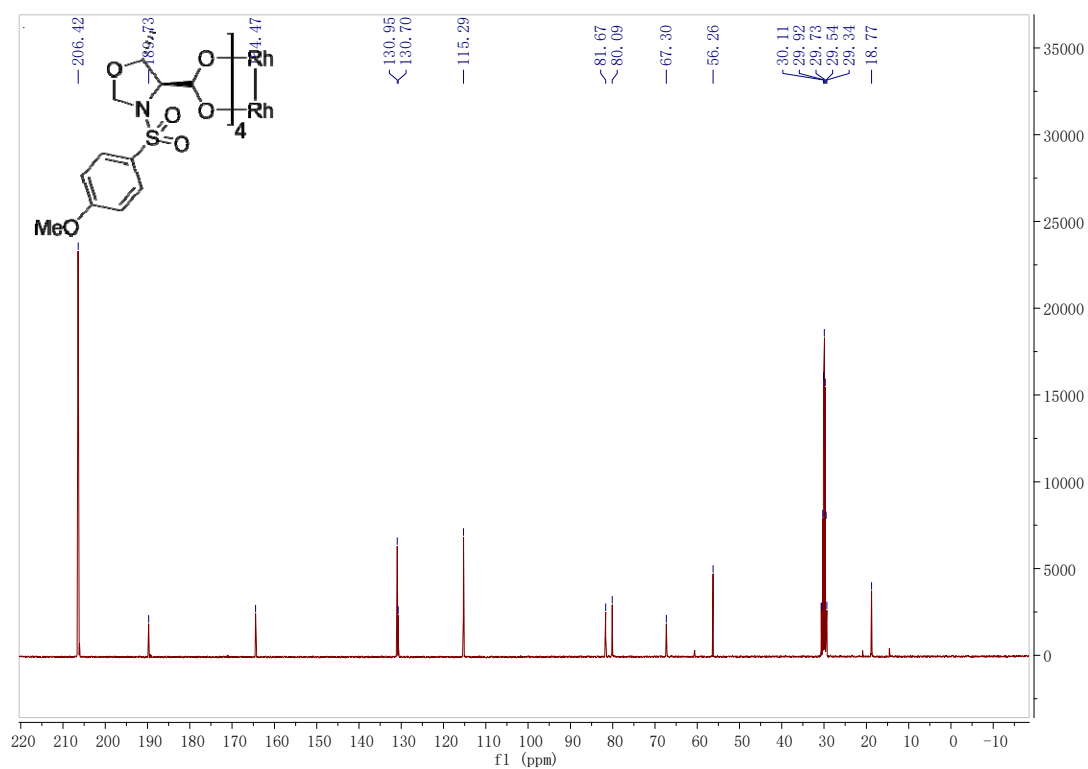

**Figure S41b:** <sup>13</sup>C NMR (100 MHz, acetone-d<sub>6</sub>) spectrum of **Rh<sub>2</sub>(4*S*,5*R*-MMOSO)<sub>4</sub>**

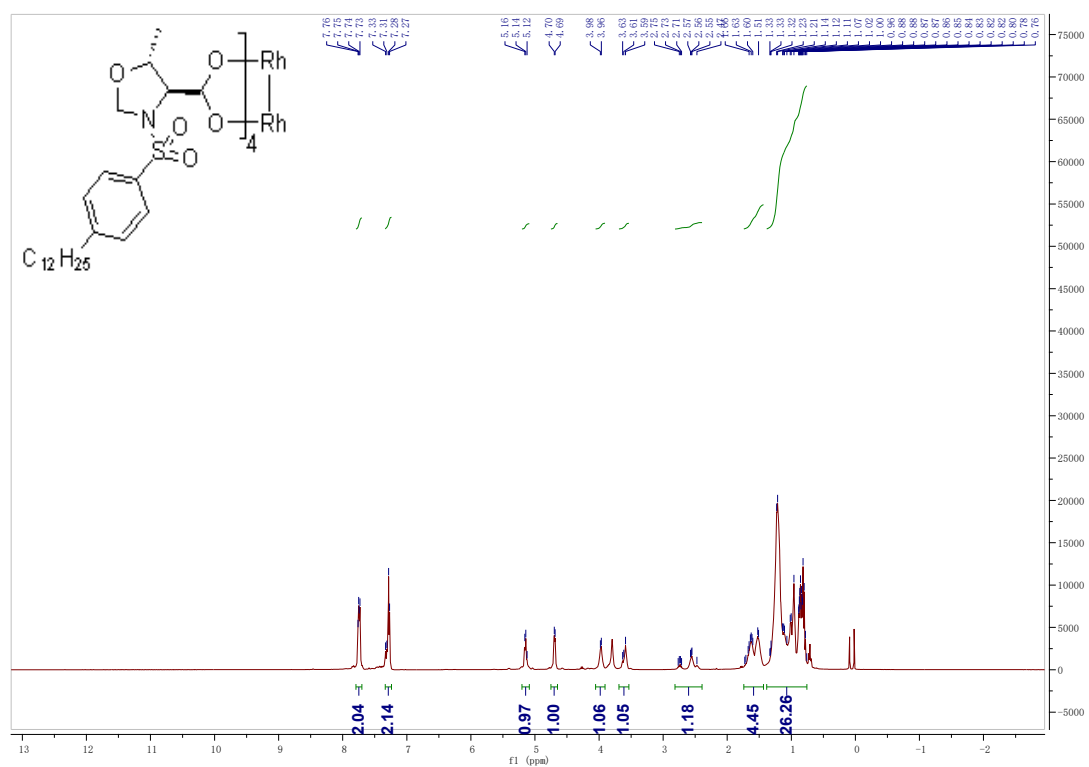

**Figure S42a:**  $^1\text{H}$  NMR (400 MHz,  $\text{CDCl}_3$ ) spectrum of  $\text{Rh}_2(4S,5R\text{-MDOSO})_4$

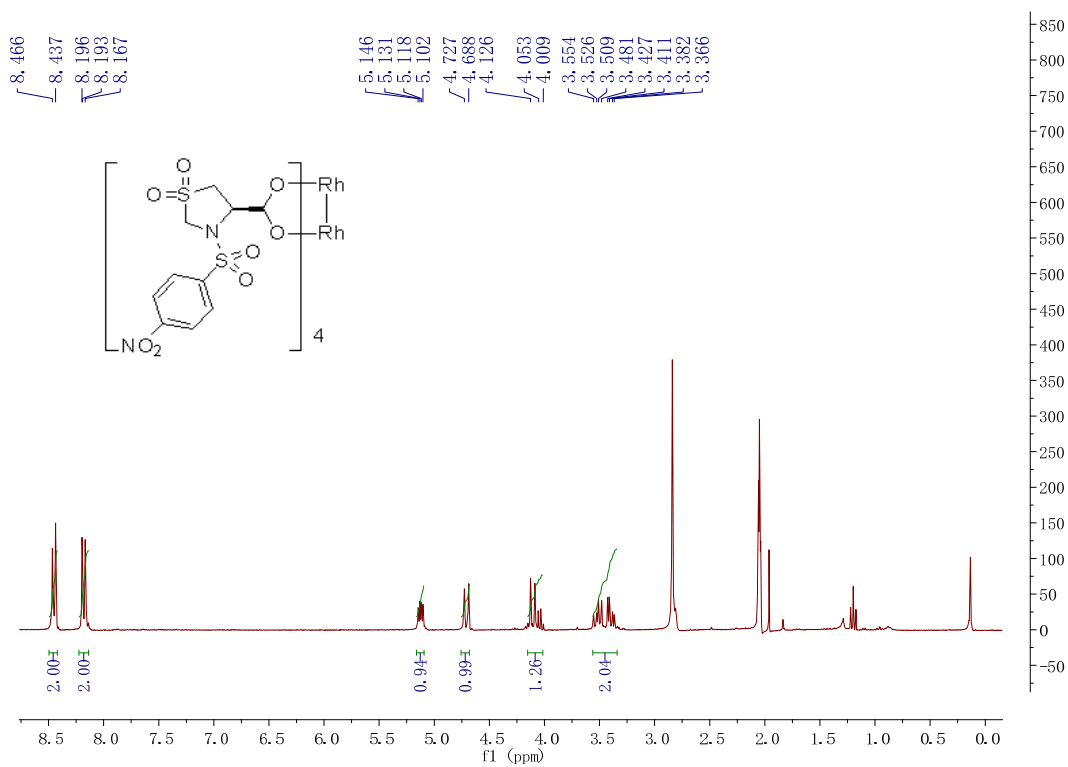

**Figure S43a:**  $^1\text{H}$  NMR (300 MHz, acetone- $\text{d}_6$ ) spectrum of  $\text{Rh}_2(4R\text{-NOST})_4$

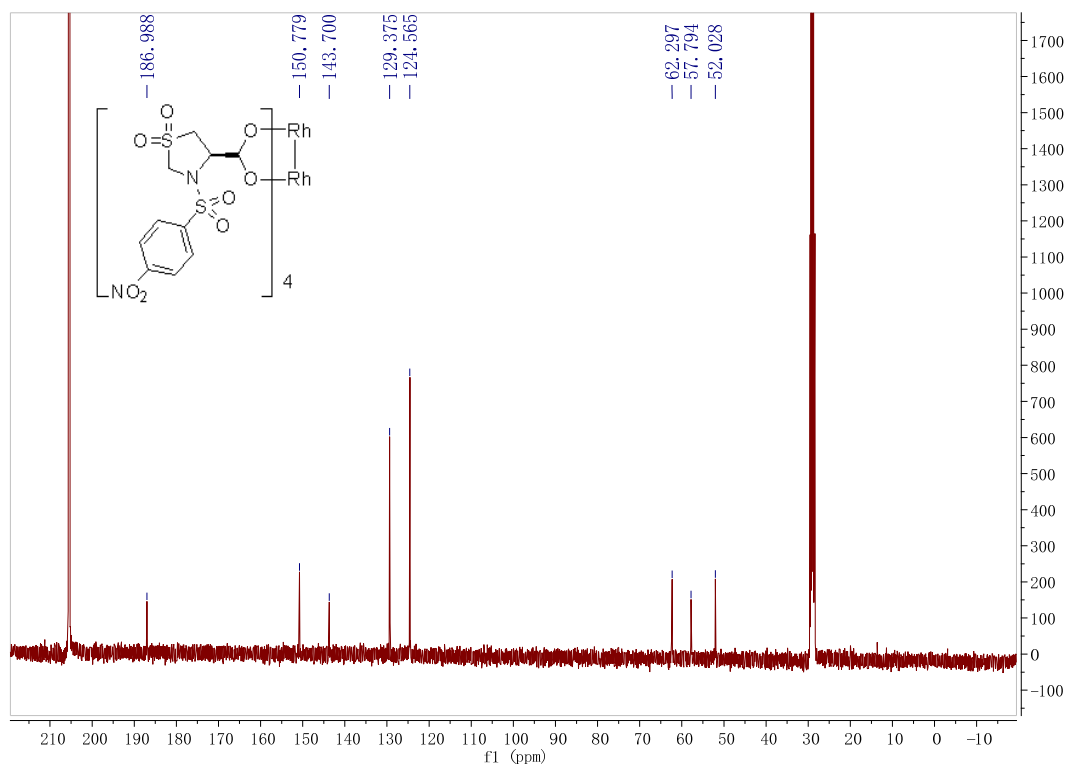

**Figure S43b:**  $^{13}\text{C}$  NMR (100 MHz, acetone- $\text{d}_6$ ) spectrum of  $\text{Rh}_2(4R\text{-NOST})_4$

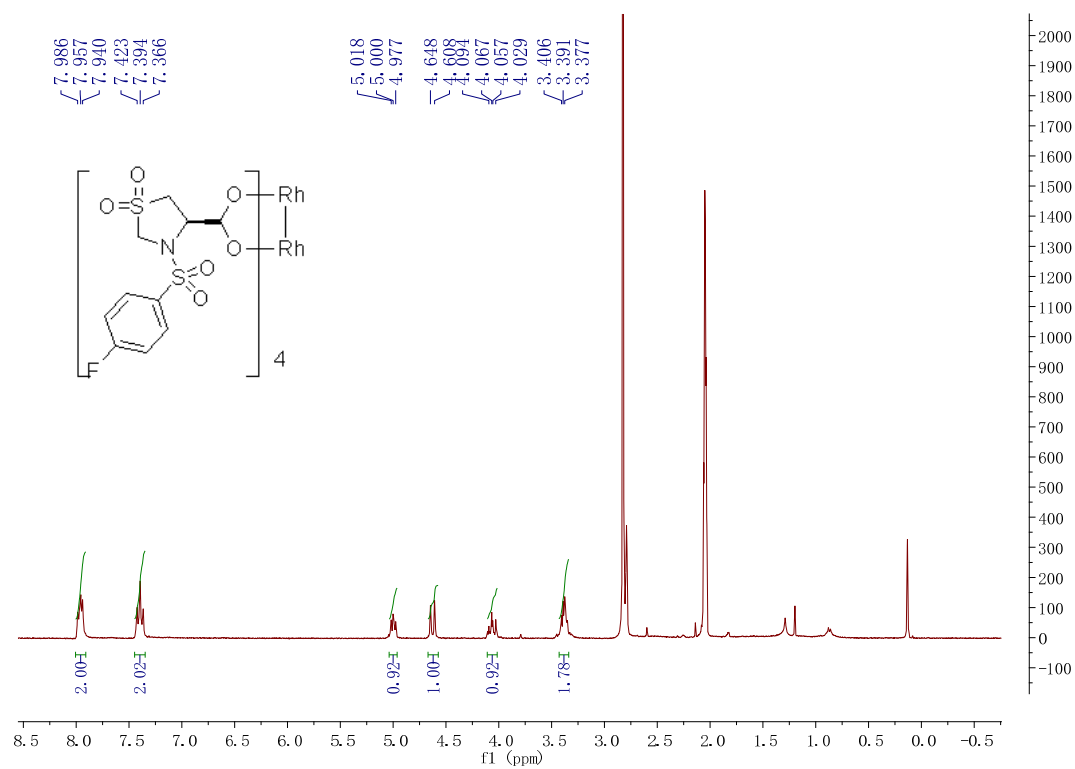

**Figure S44a:**  $^1\text{H}$  NMR (300 MHz, acetone- $\text{d}_6$ ) spectrum of  $\text{Rh}_2(4R\text{-FLST})_4$

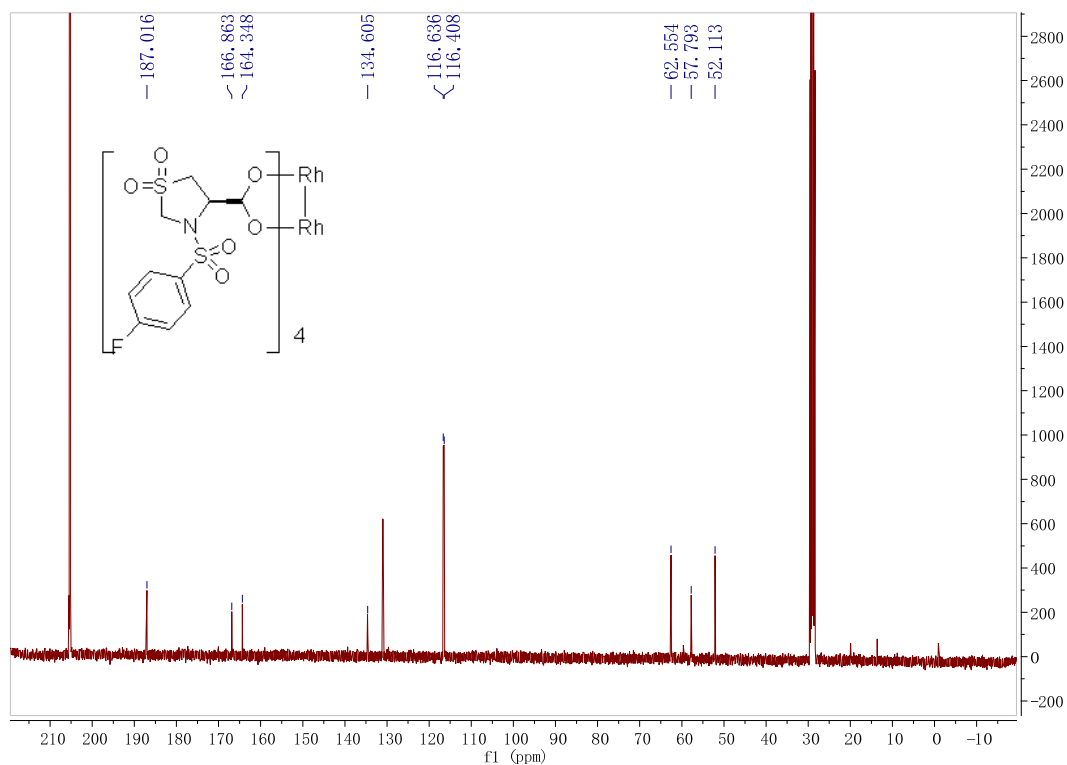

**Figure S44b:**  $^{13}\text{C}$  NMR (100 MHz, acetone- $\text{d}_6$ ) spectrum of  $\text{Rh}_2(4R\text{-FLST})_4$

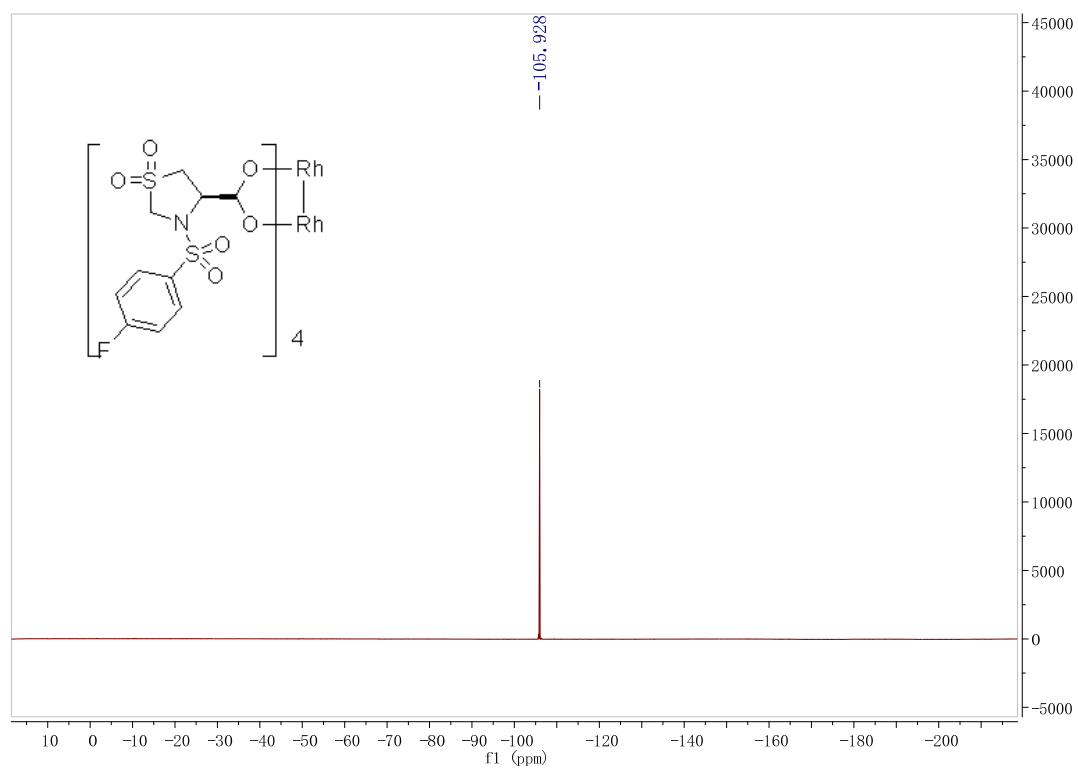

**Figure S44c:**  $^{19}\text{F}$  NMR (377 MHz,  $\text{acetone-d}_6$ ) spectrum of  $\text{Rh}_2(4R\text{-FLST})_4$

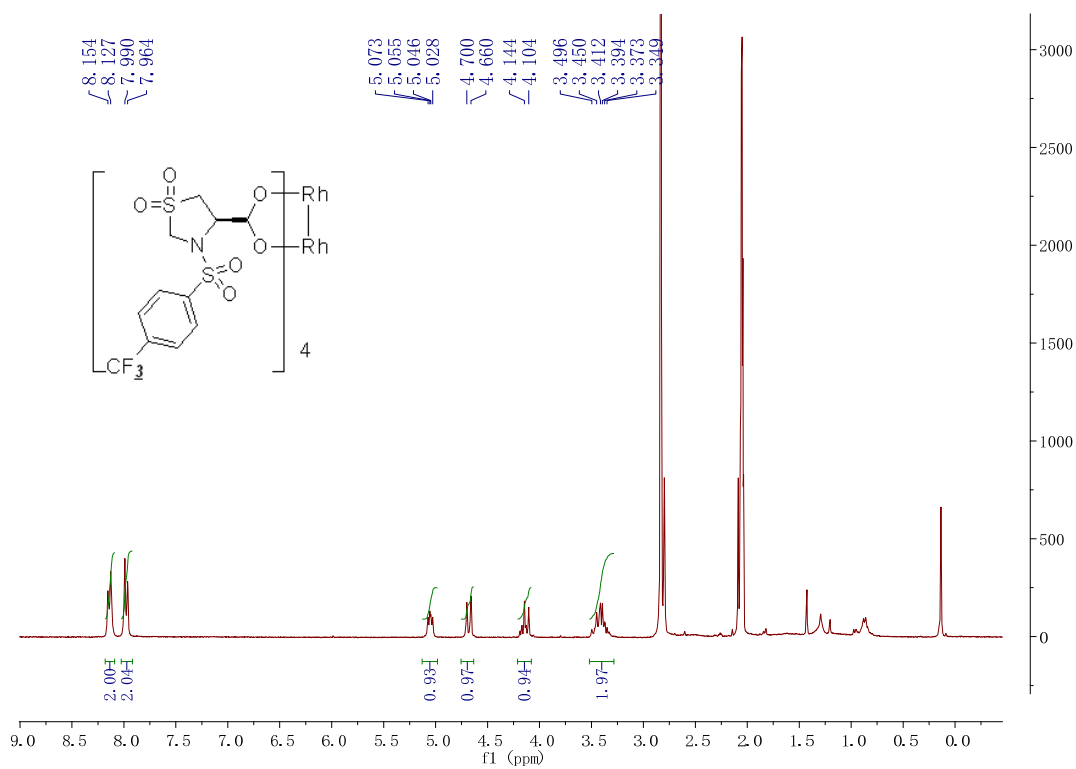

**Figure S45a:**  $^1\text{H}$  NMR (300MHz, acetone- $\text{d}_6$ ) spectrum of  $\text{Rh}_2(\text{4R-TFST})_4$

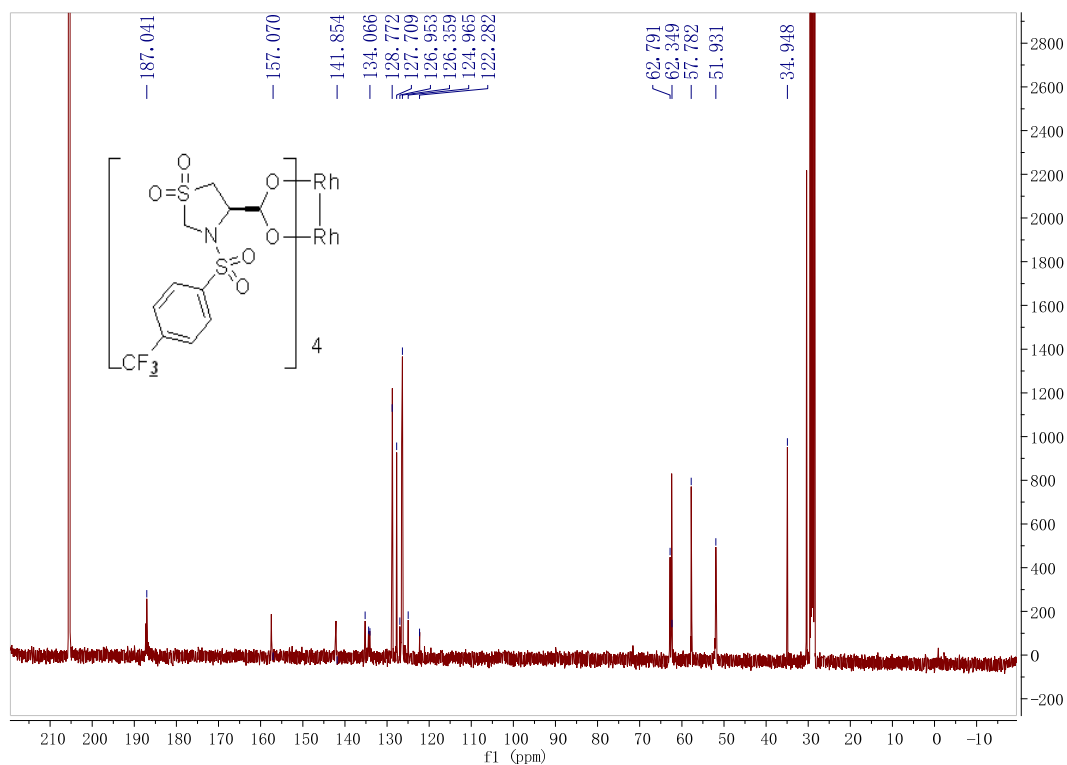

**Figure S45b:**  $^{13}\text{C}$  NMR (100 MHz, acetone- $\text{d}_6$ ) spectrum of  $\text{Rh}_2(\text{4R-TFST})_4$

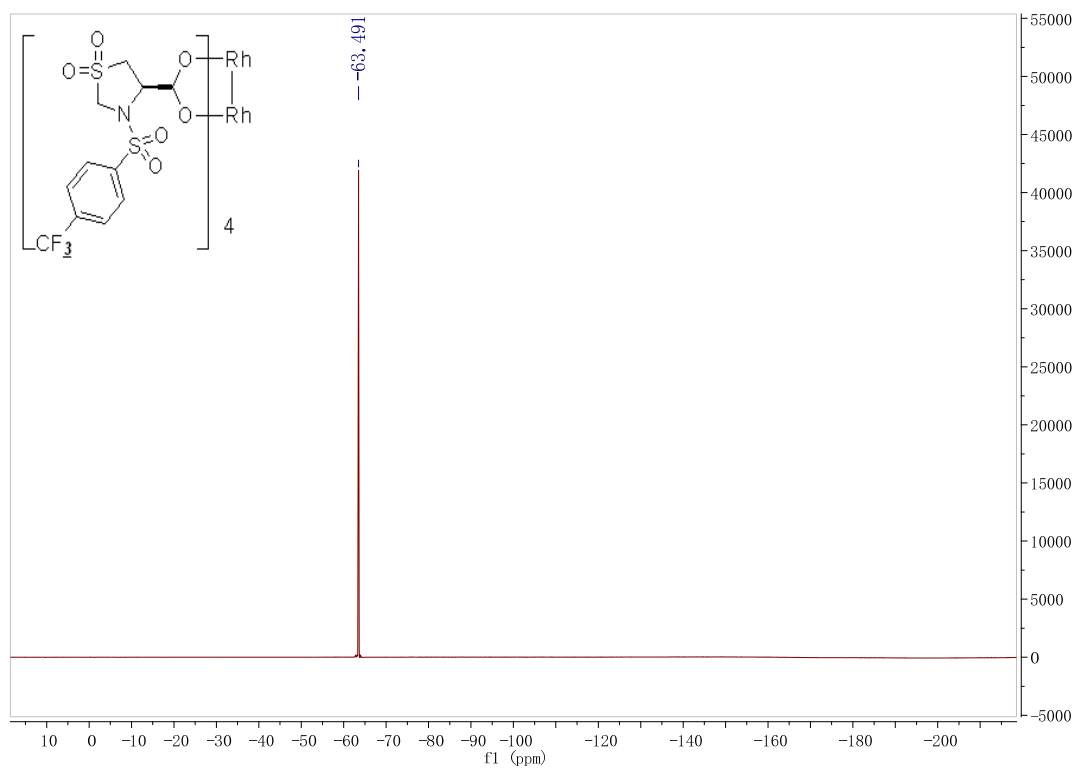

**Figure S45c:**  $^{19}\text{F}$  NMR (377 MHz,  $\text{acetone-d}_6$ ) spectrum of  $\text{Rh}_2(4R\text{-TFST})_4$

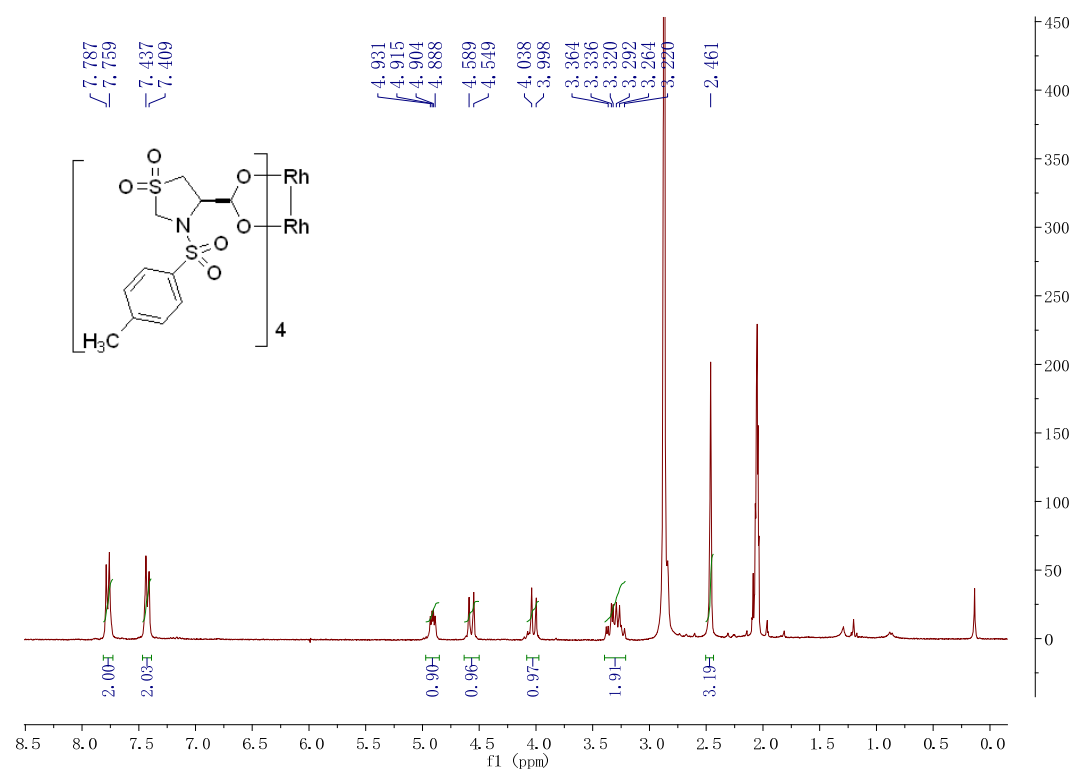

**Figure S46a:**  $^1\text{H}$  NMR (300 MHz, acetone- $\text{d}_6$ ) spectrum of  $\text{Rh}_2(4R\text{-MEST})_4$

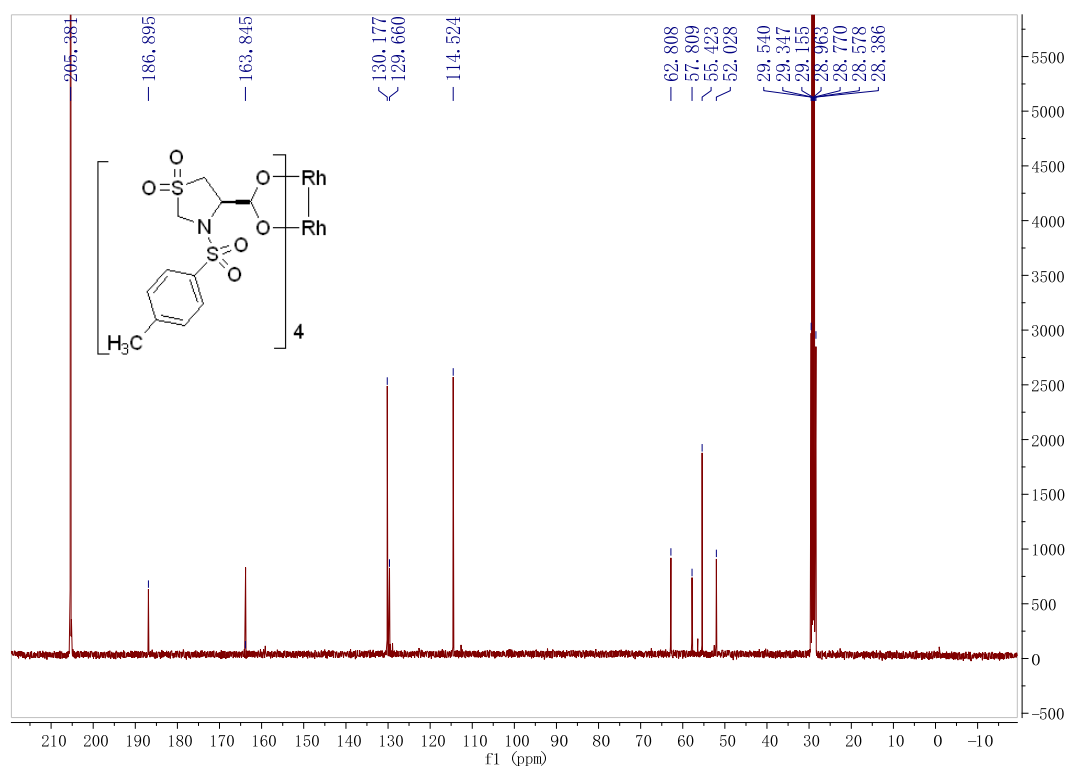

**Figure S46b:**  $^{13}\text{C}$  NMR (100 MHz, acetone- $\text{d}_6$ ) spectrum of  $\text{Rh}_2(4R\text{-MEST})_4$

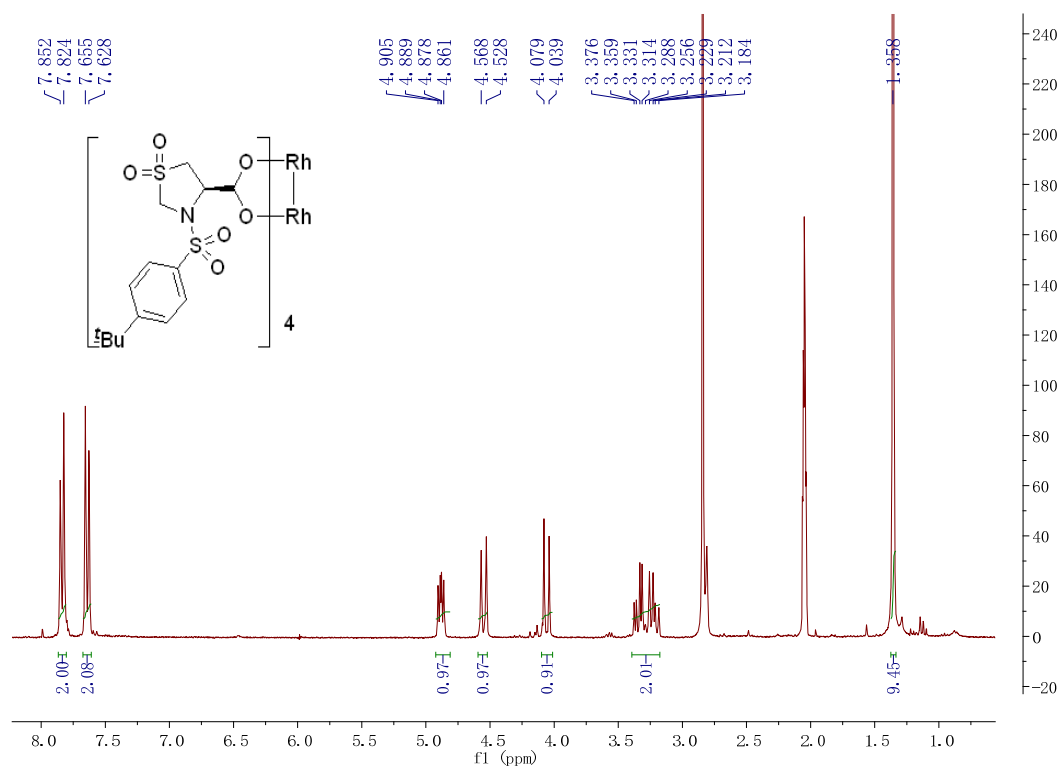

**Figure S47a:**  $^1\text{H}$  NMR (300 MHz,  $\text{acetone-d}_6$ ) spectrum of  $\text{Rh}_2(\text{4R-TBST})_4$

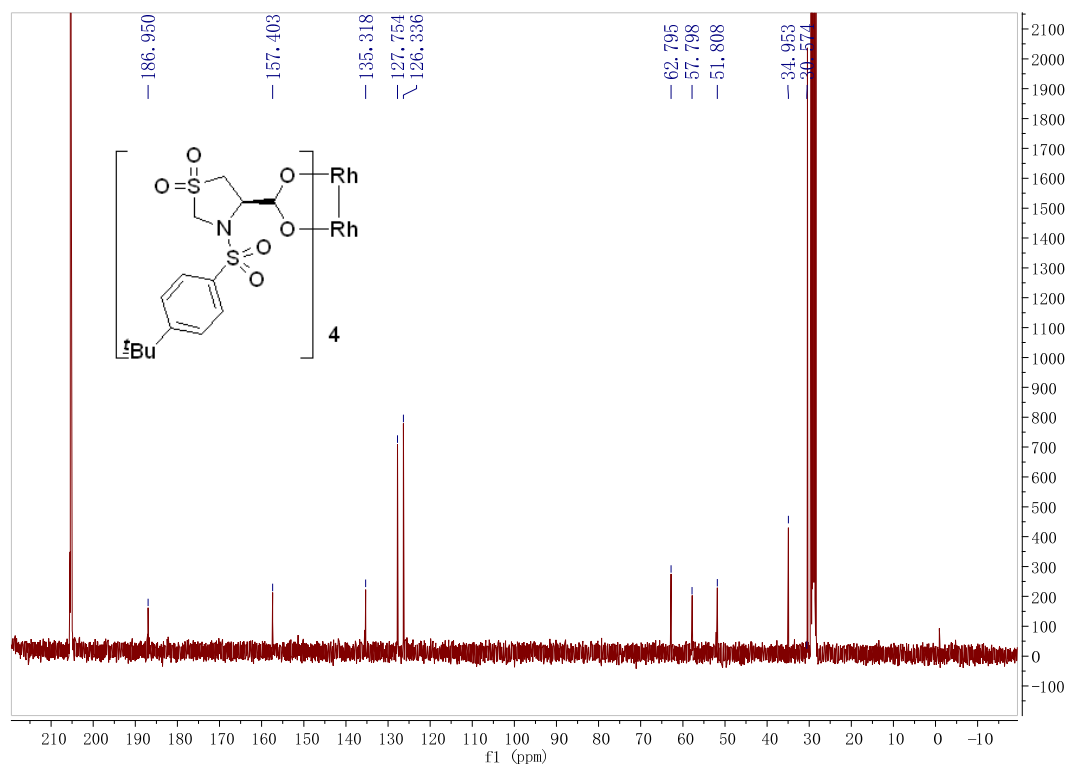

**Figure S47b:**  $^{13}\text{C}$  NMR (100 MHz,  $\text{acetone-d}_6$ ) spectrum of  $\text{Rh}_2(\text{4R-TBST})_4$

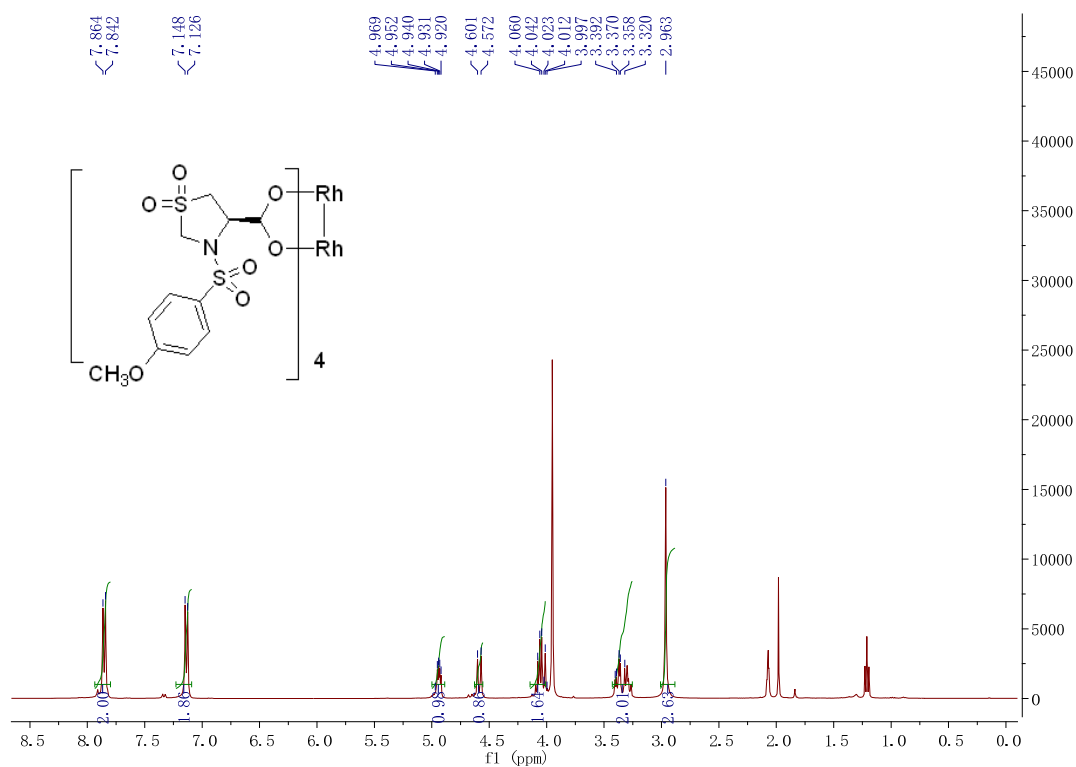

**Figure S48a:**  $^1\text{H}$  NMR (400 MHz, acetone- $\text{d}_6$ ) spectrum of  $\text{Rh}_2(\text{4R-MOST})_4$

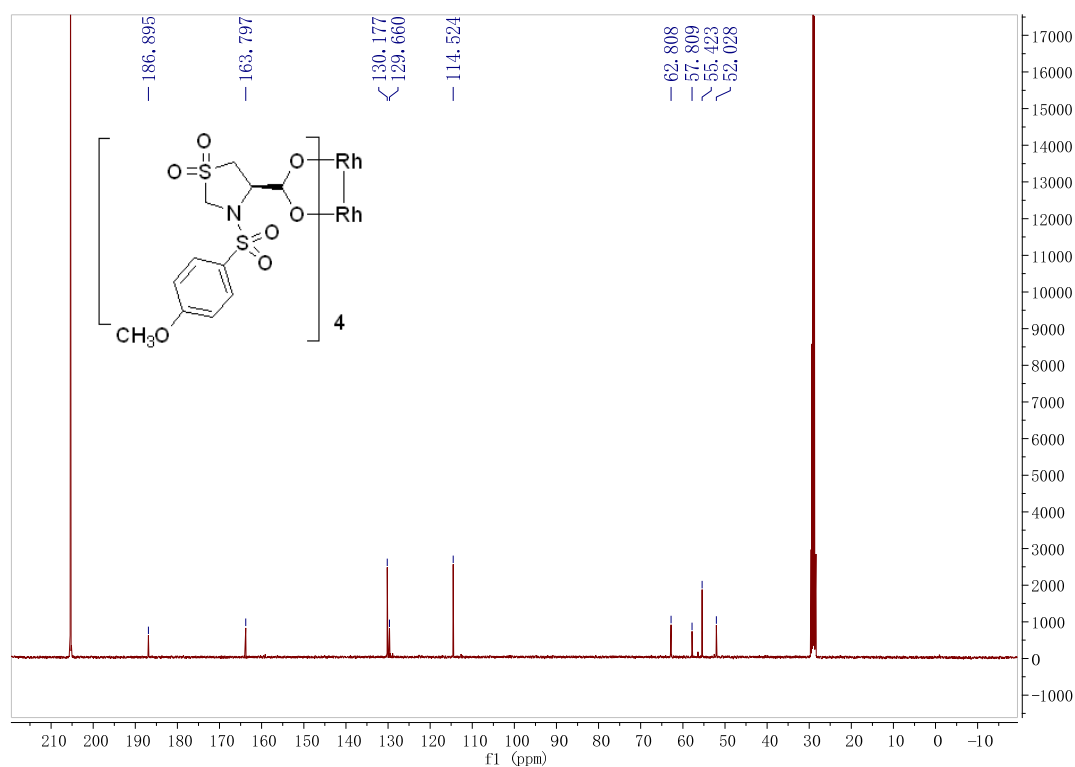

**Figure S48b:**  $^{13}\text{C}$  NMR (100 MHz, acetone- $\text{d}_6$ ) spectrum of  $\text{Rh}_2(\text{4R-MOST})_4$

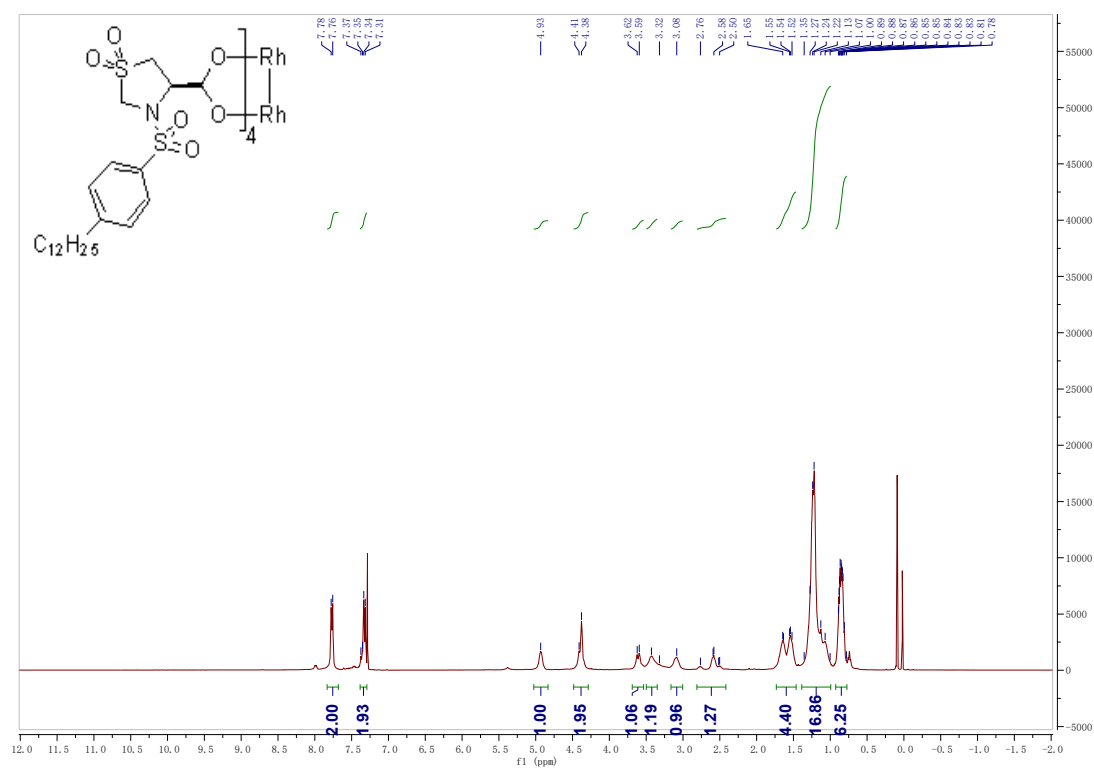

**Figure S49a:**  $^1\text{H}$  NMR (400 MHz,  $\text{CDCl}_3$ ) spectrum of  $\text{Rh}_2(4R\text{-DOST})_4$

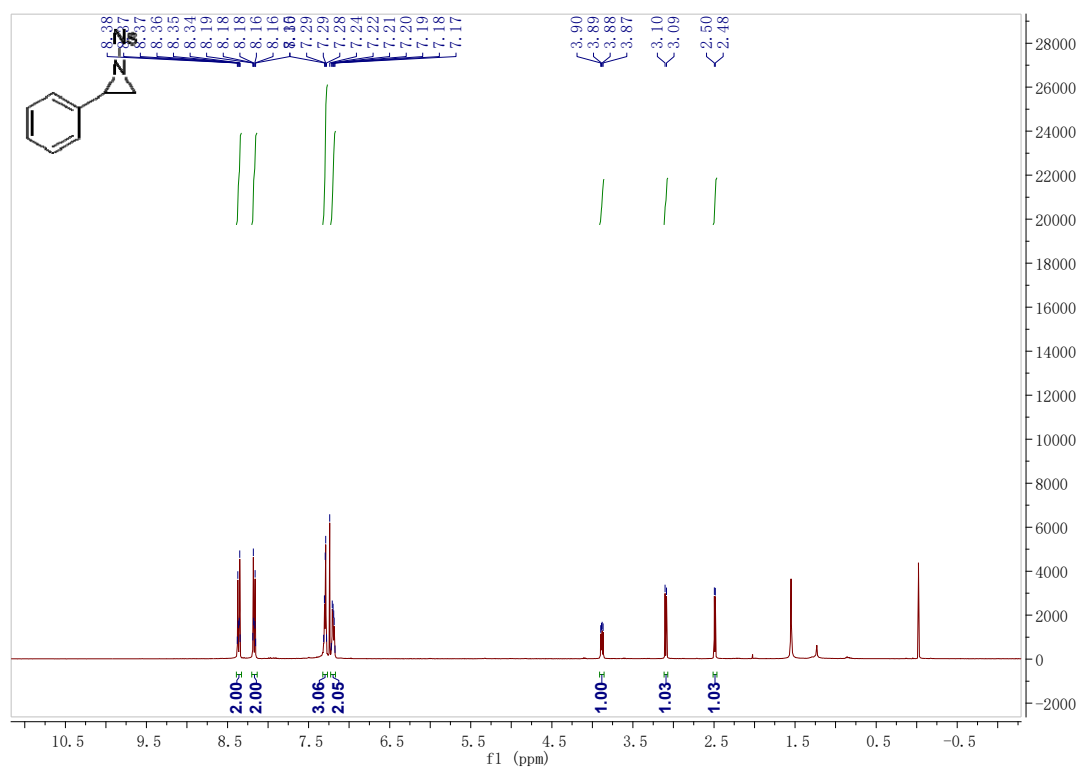

**Figure S50a:** <sup>1</sup>H NMR (400 MHz, CDCl<sub>3</sub>) spectrum of **1-((4-nitrophenyl)sulfonyl)-2-phenylaziridine (1)**

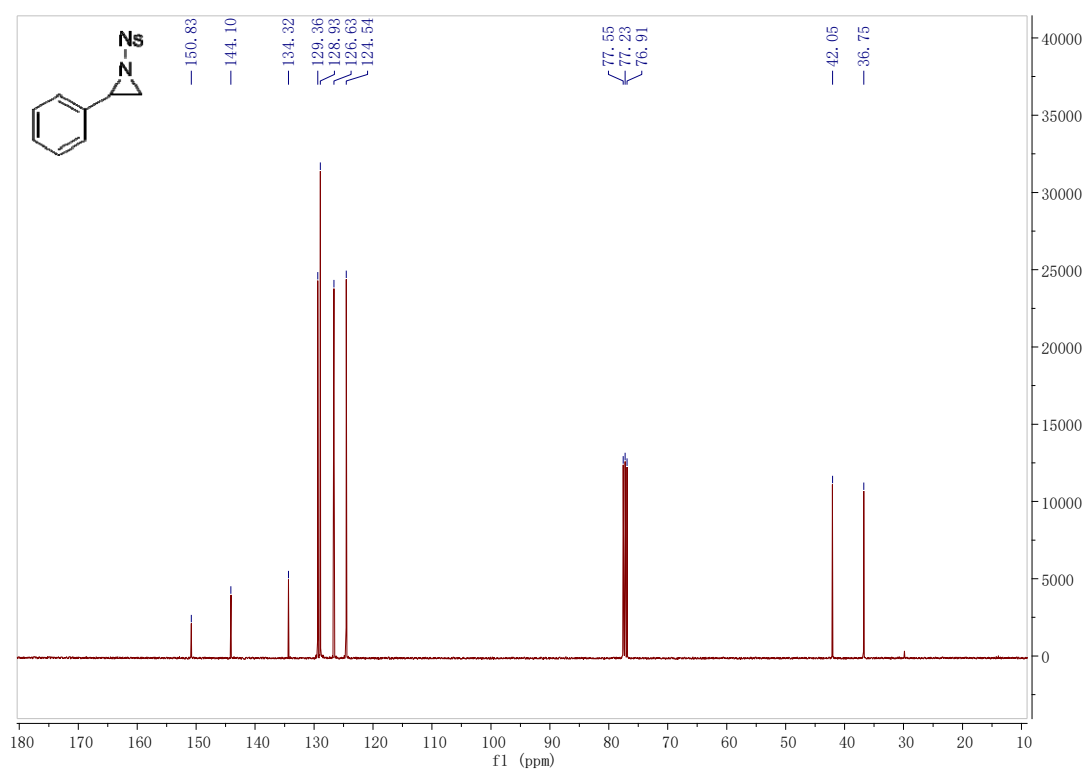

**Figure S50b:** <sup>13</sup>C NMR (100 MHz, CDCl<sub>3</sub>) spectrum of **1-((4-nitrophenyl)sulfonyl)-2-phenylaziridine (1)**

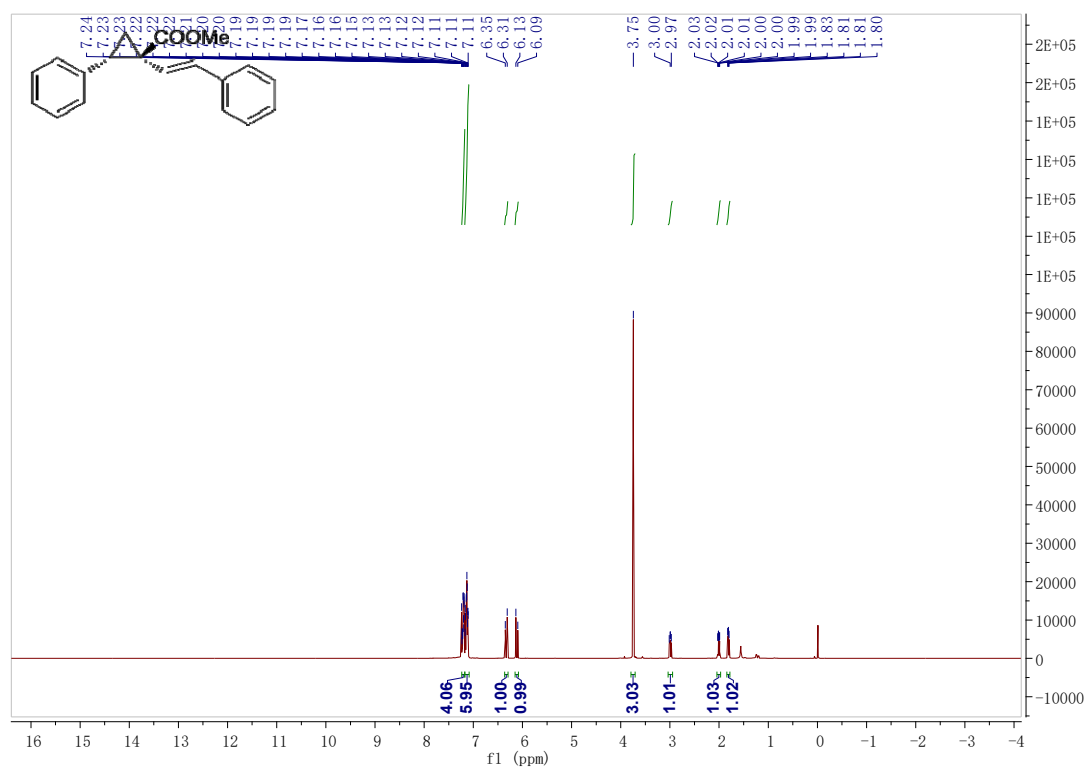

**Figure S51a:** <sup>1</sup>H NMR (400 MHz, CDCl<sub>3</sub>) spectrum of (1S,2S)-Methyl 2-Phenyl-1-((E)-styryl)cyclopropanecarboxylate (2a)

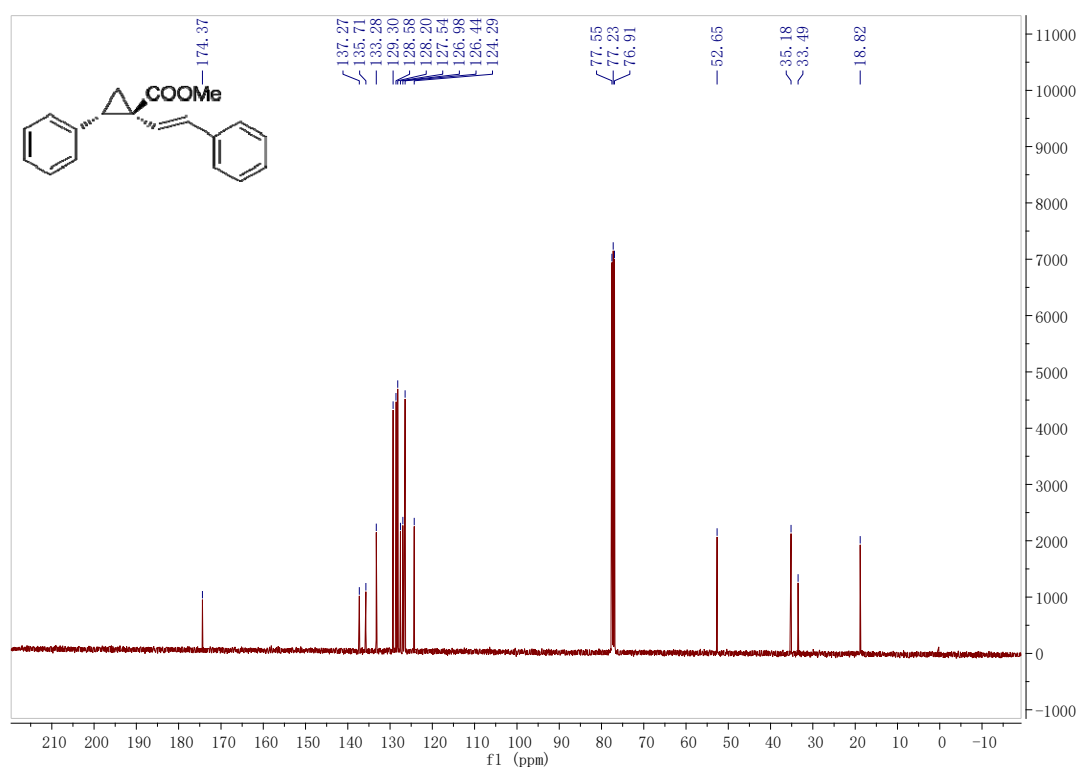

**Figure S51b:** <sup>13</sup>C NMR (100 MHz, CDCl<sub>3</sub>) spectrum of (1S,2S)-Methyl 2-Phenyl-1-((E)-styryl)cyclopropanecarboxylate (2a)

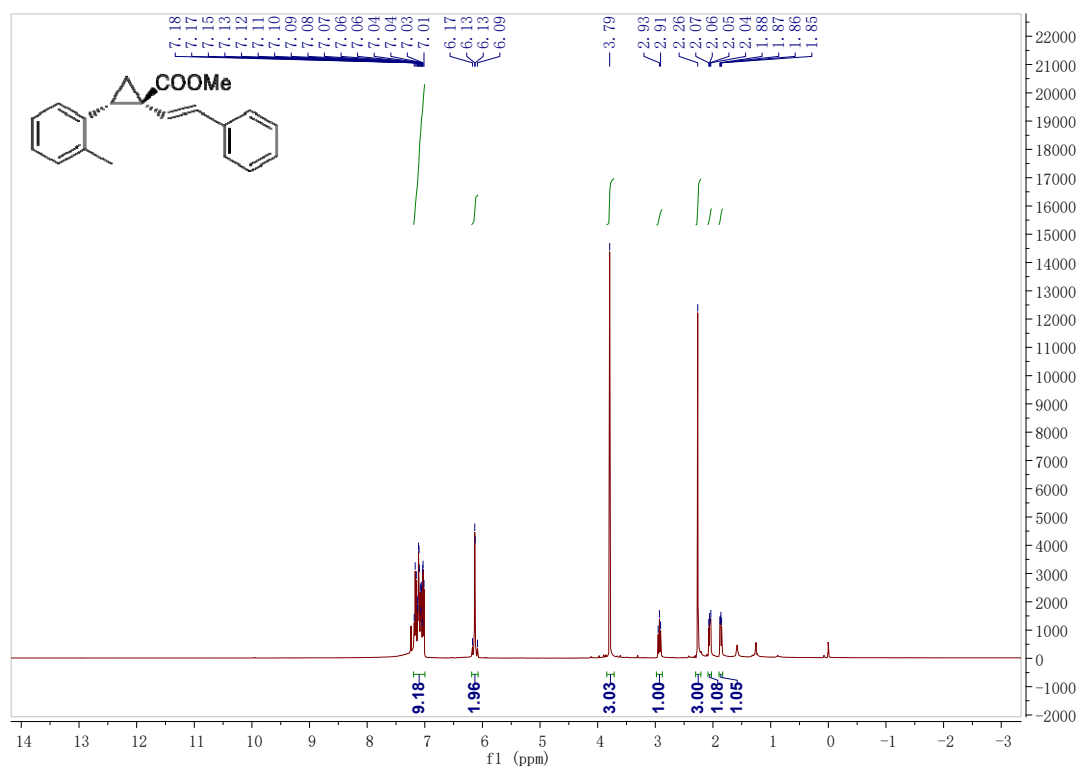

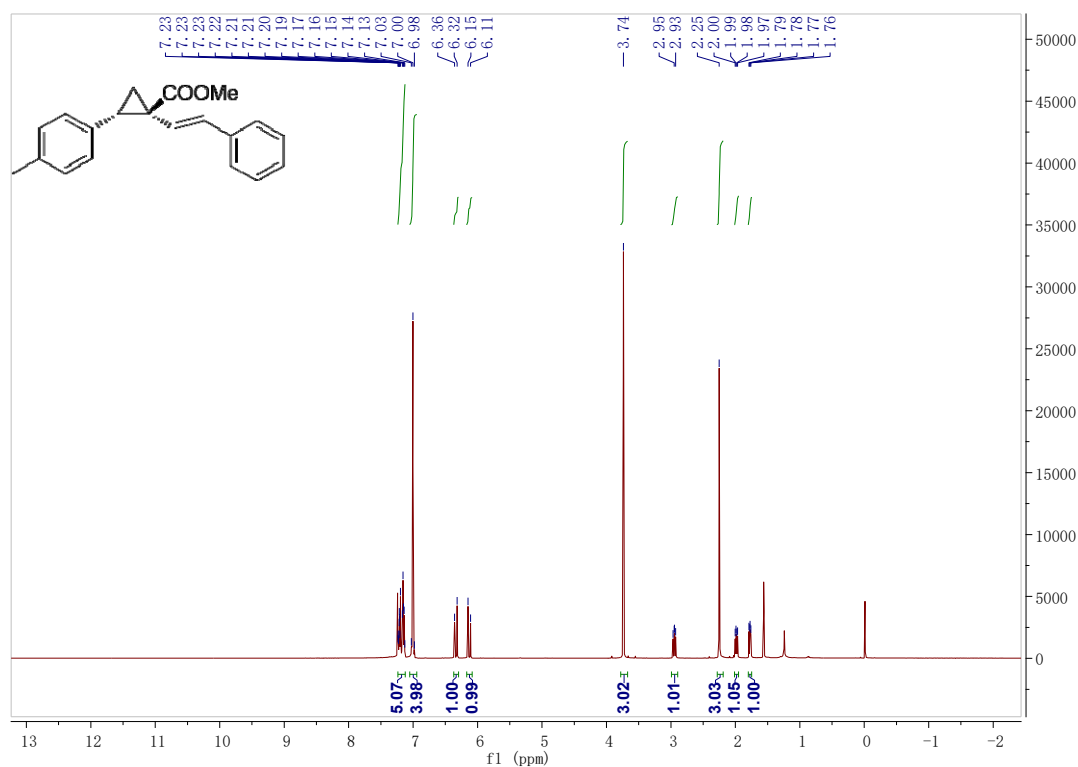

**Figure S53a:**  $^1\text{H}$  NMR (400 MHz,  $\text{CDCl}_3$ ) spectrum of (1*S*,2*S*)-Methyl 1-((*E*)-Styryl)-2-(*p*-tolyl)cyclopropanecarboxylate (**2c**)

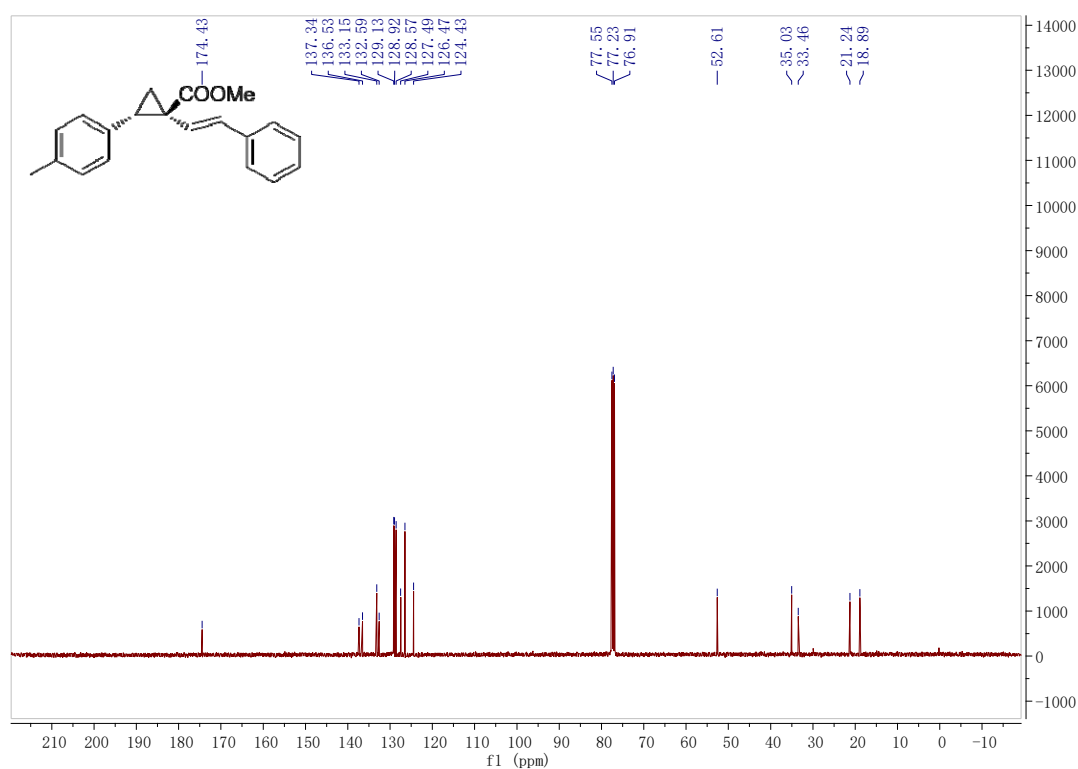

**Figure S53b:**  $^{13}\text{C}$  NMR (100 MHz,  $\text{CDCl}_3$ ) spectrum of (1*S*,2*S*)-Methyl 1-((*E*)-Styryl)-2-(*p*-tolyl)cyclopropanecarboxylate (**2c**)

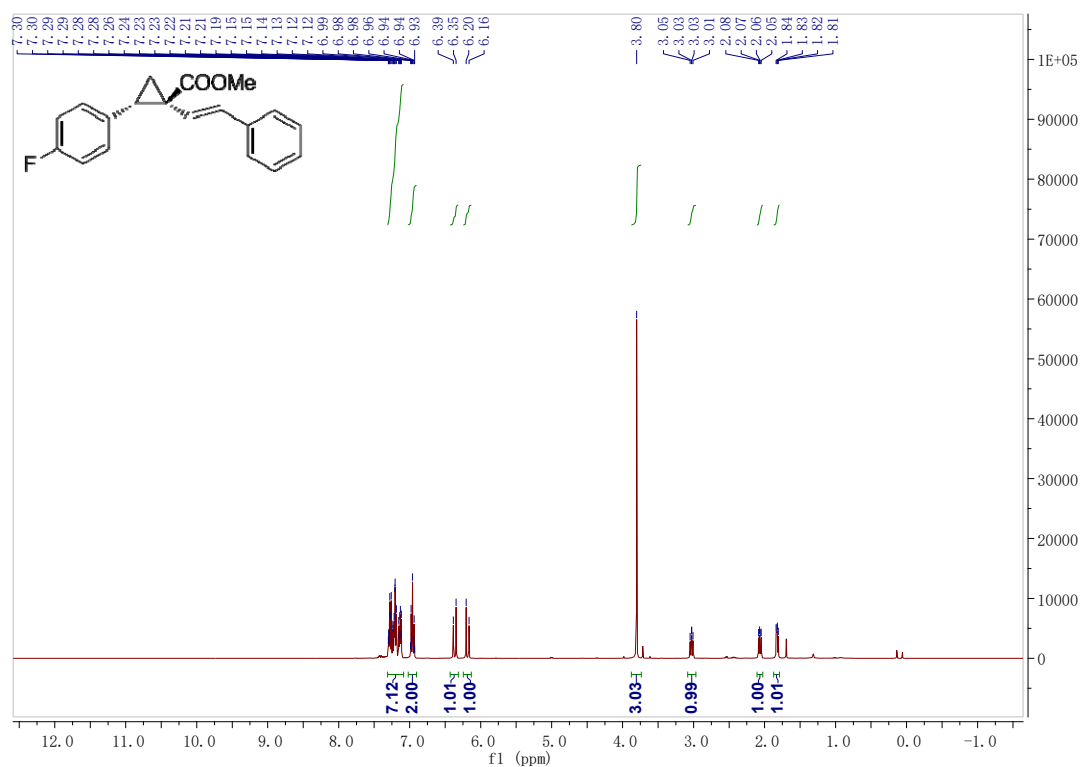

**Figure S54a:** <sup>1</sup>H NMR (400 MHz, CDCl<sub>3</sub>) spectrum of (1*S*,2*S*)-Methyl 2-(4-Fluorophenyl)-1-((*E*)-styryl)cyclopropanecarboxylate (**2d**)

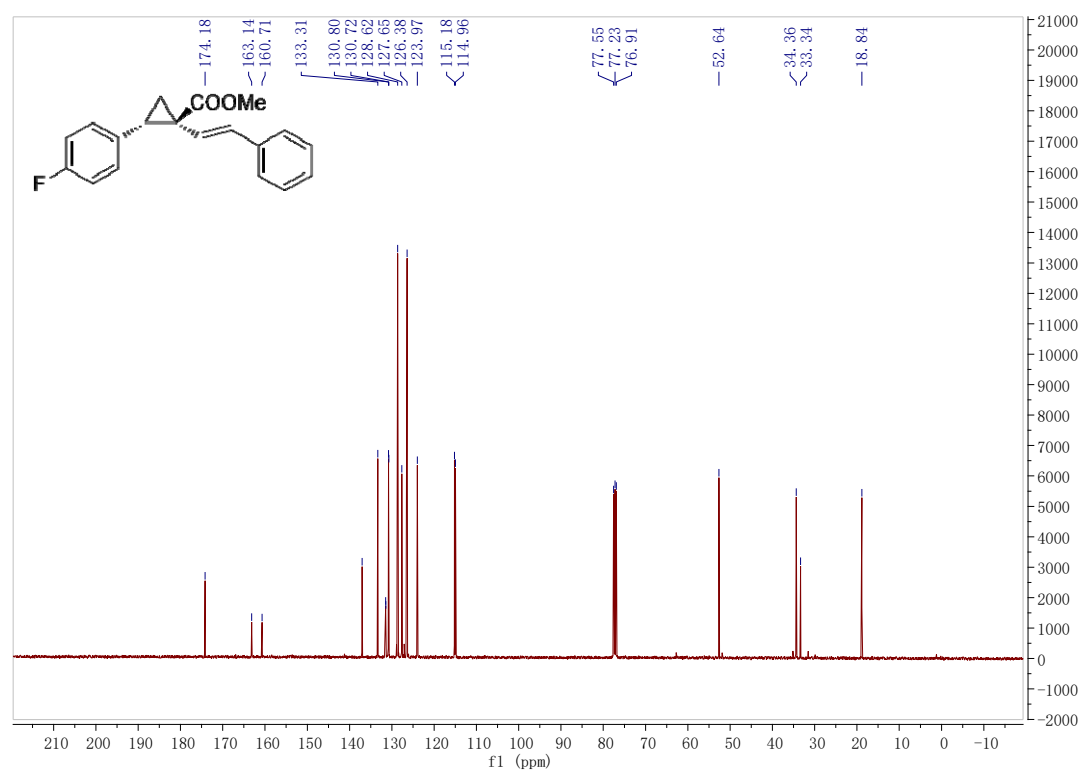

**Figure S54b:** <sup>13</sup>C NMR (100 MHz, CDCl<sub>3</sub>) spectrum of (1*S*,2*S*)-Methyl 2-(4-Fluorophenyl)-1-((*E*)-styryl)cyclopropanecarboxylate (**2d**)

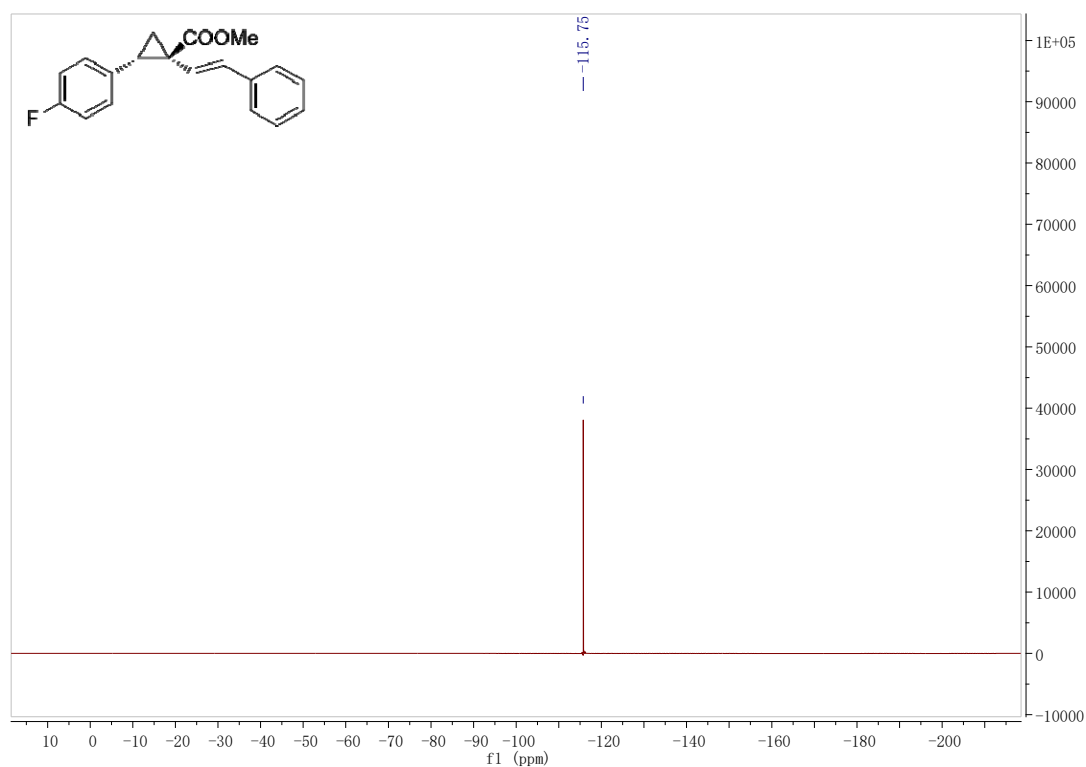

**Figure S54c:**  $^{19}\text{F}$  NMR (377 MHz,  $\text{CDCl}_3$ ) spectrum of (1*S*,2*S*)-Methyl 2-(4-Fluorophenyl)-1-((*E*)-styryl)cyclopropanecarboxylate (**2d**)

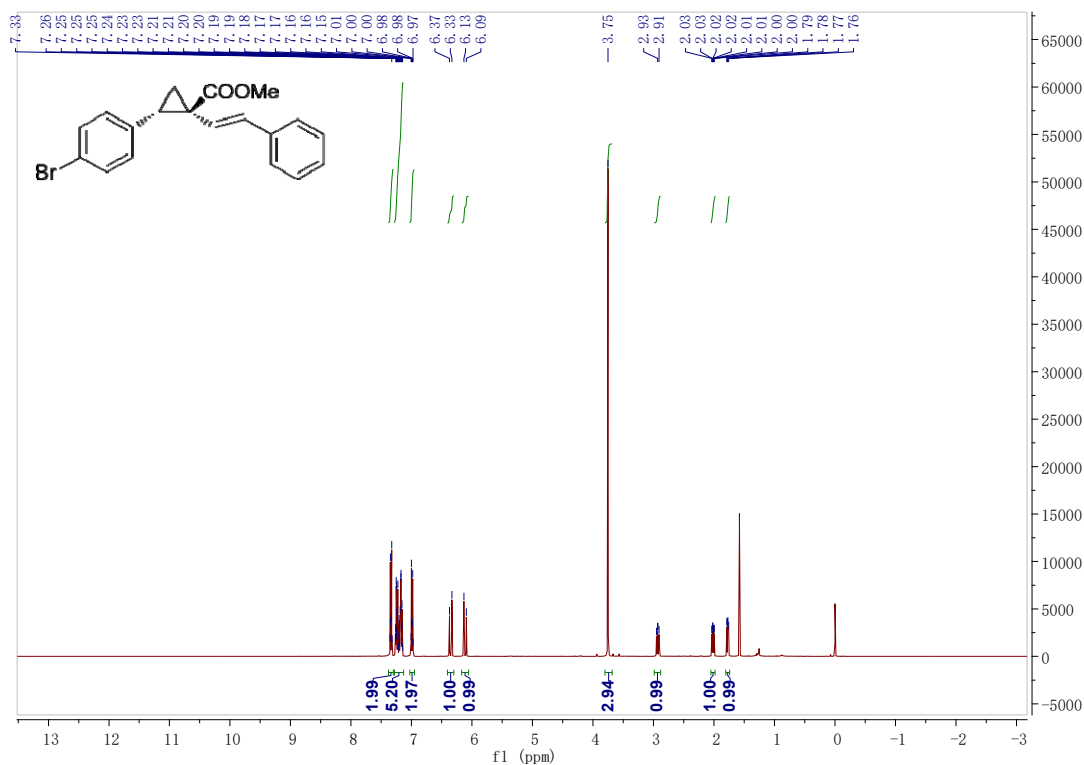

**Figure S55a:**  $^1\text{H}$  NMR (400 MHz,  $\text{CDCl}_3$ ) spectrum of (1*S*,2*S*)-Methyl 2-(4-Bromophenyl)-1-((*E*)-styryl)cyclopropanecarboxylate (**2e**)

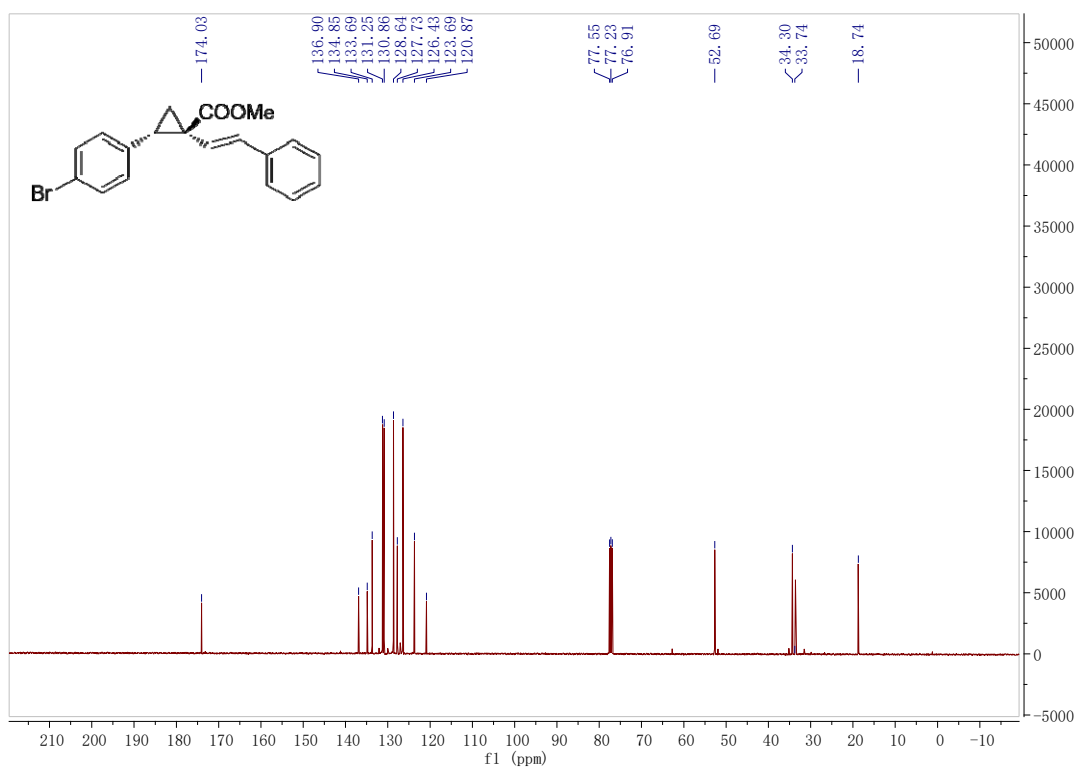

**Figure S55b:**  $^{13}\text{C}$  NMR (100 MHz,  $\text{CDCl}_3$ ) spectrum of (1*S*,2*S*)-Methyl 2-(4-Bromophenyl)-1-((*E*)-styryl)cyclopropanecarboxylate (**2e**)

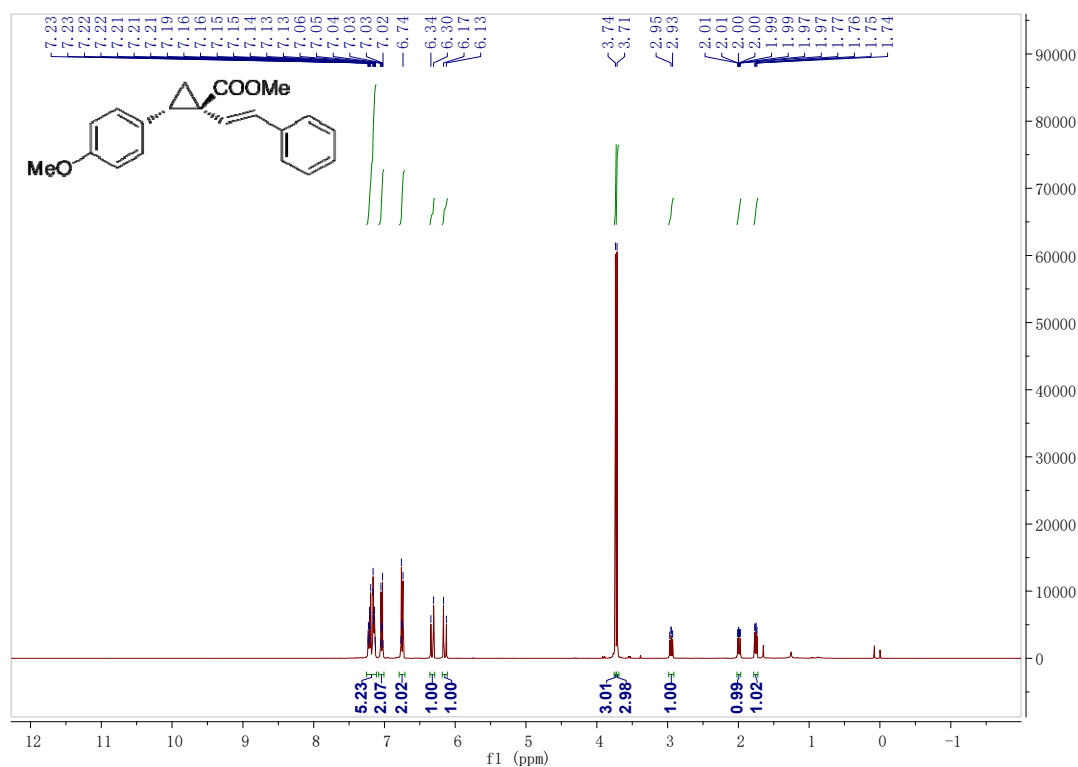

**Figure S56a:**  $^1\text{H}$  NMR (400 MHz,  $\text{CDCl}_3$ ) spectrum of (1*S*,2*S*)-Methyl 2-(4-Methoxyphenyl)-1-((*E*)-styryl)cyclopropanecarboxylate (2f)

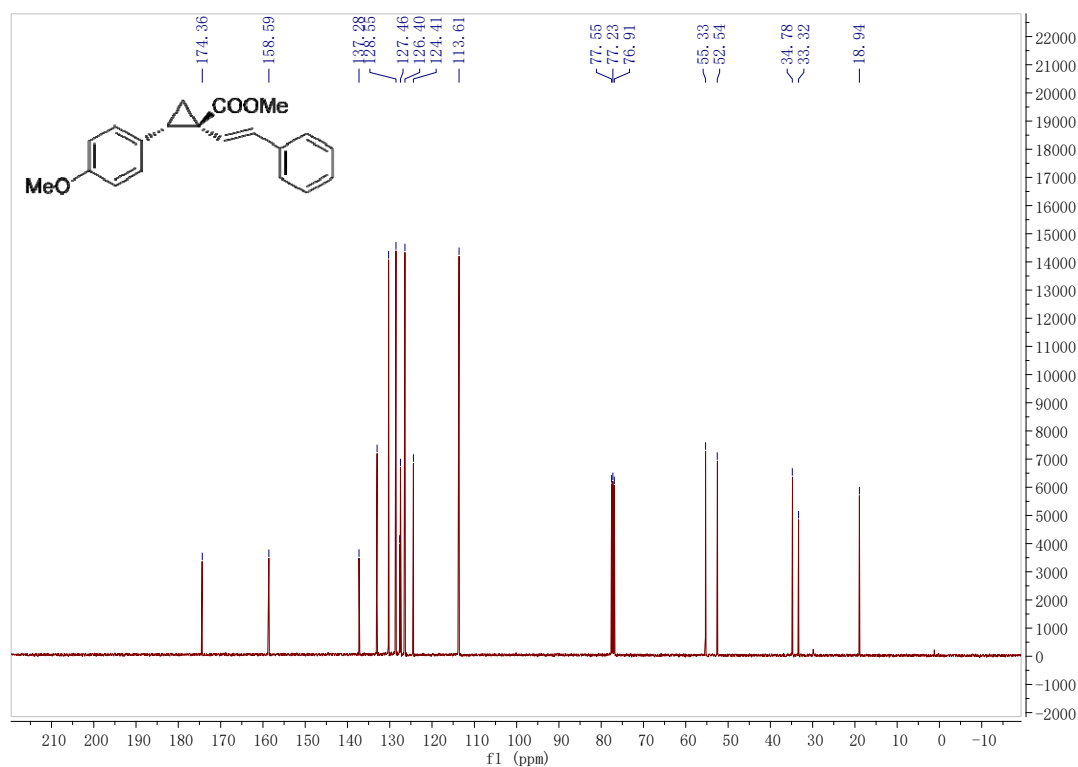

**Figure S56b:**  $^{13}\text{C}$  NMR (100 MHz,  $\text{CDCl}_3$ ) spectrum of (1*S*,2*S*)-Methyl 2-(4-Methoxyphenyl)-1-((*E*)-styryl)cyclopropanecarboxylate (2f)

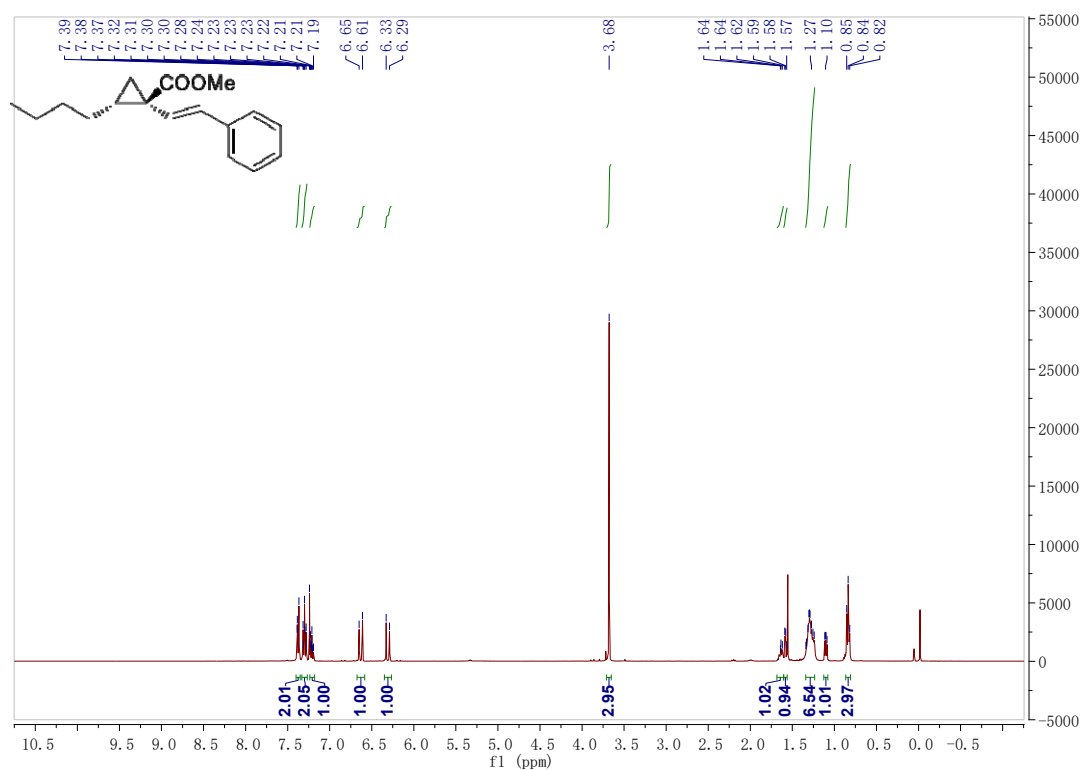

**Figure S57a:** <sup>1</sup>H NMR (400 MHz, CDCl<sub>3</sub>) spectrum of **Methyl 2-Butyl-1-((E)-styryl)cyclopropanecarboxylate (2g)**

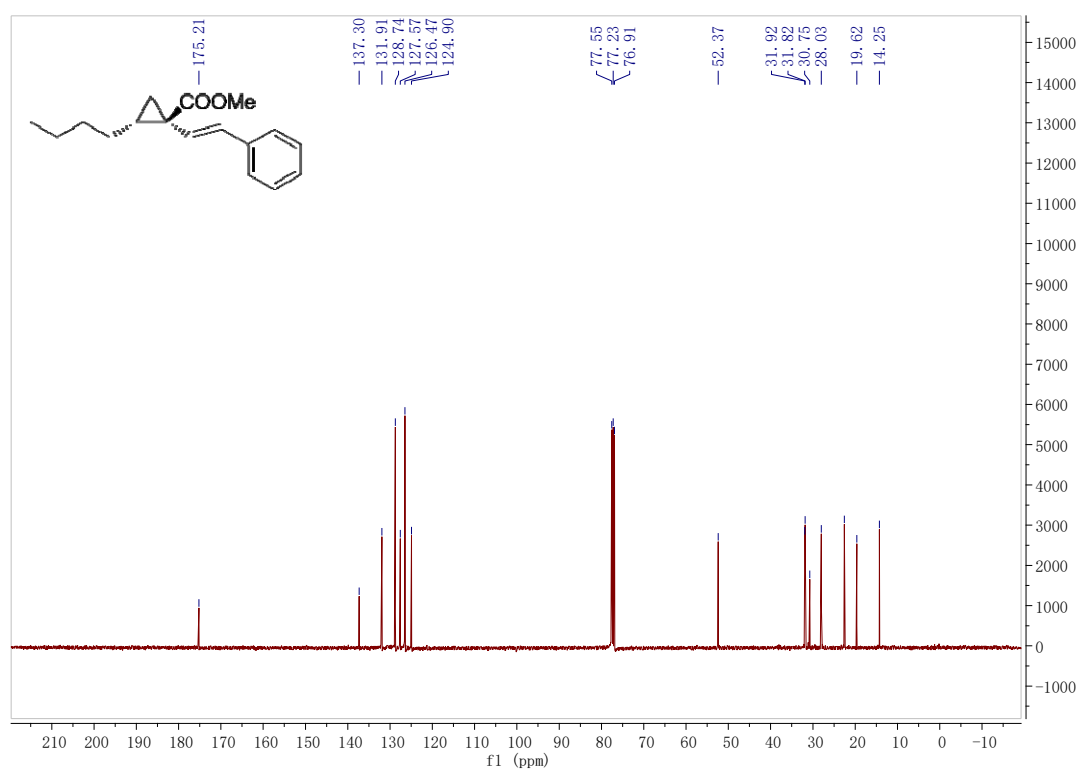

**Figure S57b:** <sup>13</sup>C NMR (100 MHz, CDCl<sub>3</sub>) spectrum of **Methyl 2-Butyl-1-((E)-styryl)cyclopropanecarboxylate (2g)**

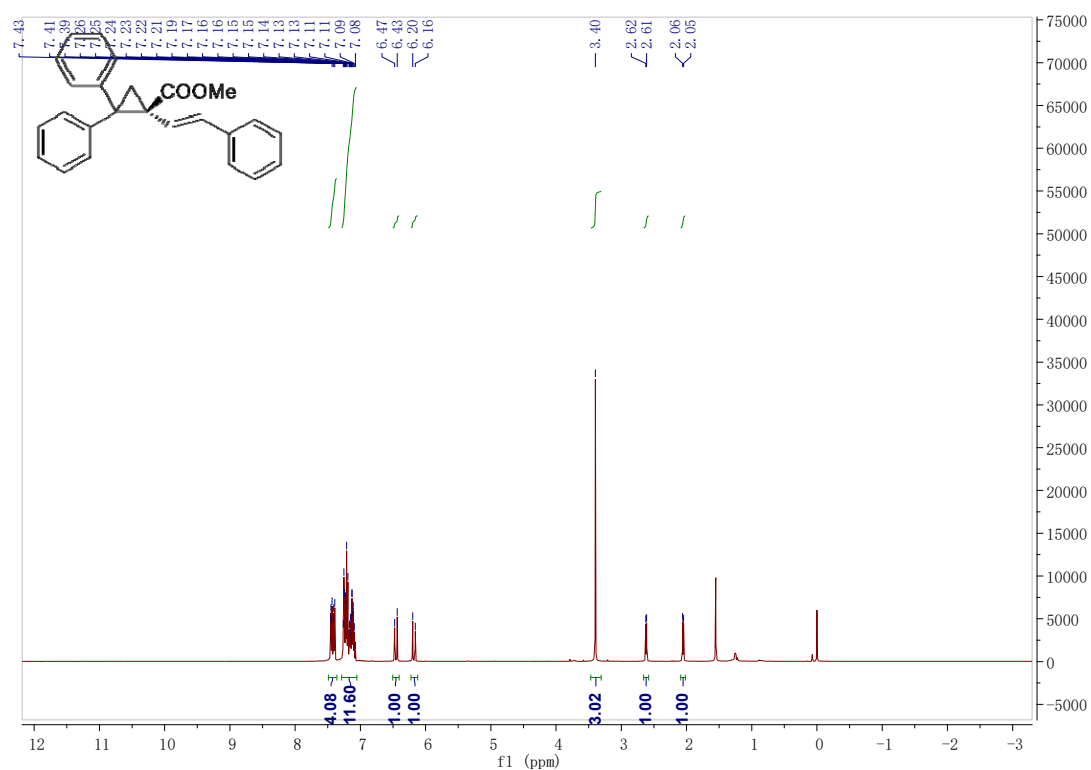

**Figure S58a:**  $^1\text{H}$  NMR (400 MHz,  $\text{CDCl}_3$ ) spectrum of **Methyl 2,2-Diphenyl-1-styrylcyclopropanecarboxylate (2h)**

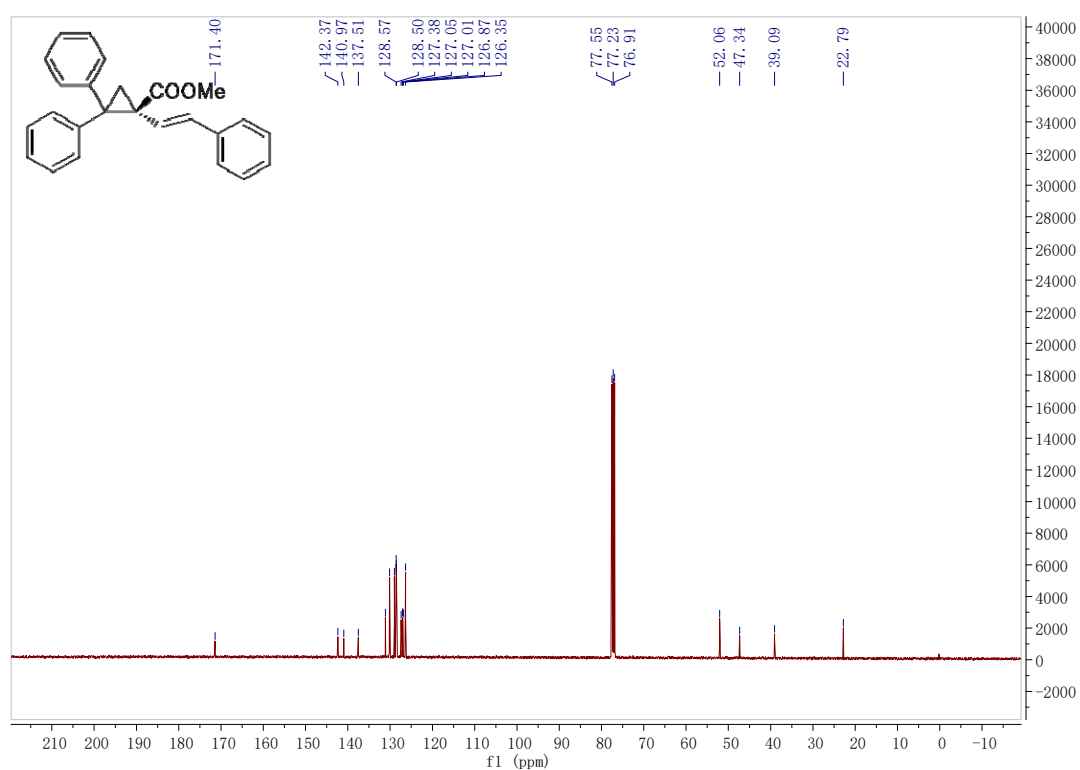

**Figure S58b:**  $^{13}\text{C}$  NMR (100 MHz,  $\text{CDCl}_3$ ) spectrum of **Methyl 2,2-Diphenyl-1-styrylcyclopropanecarboxylate (2h)**

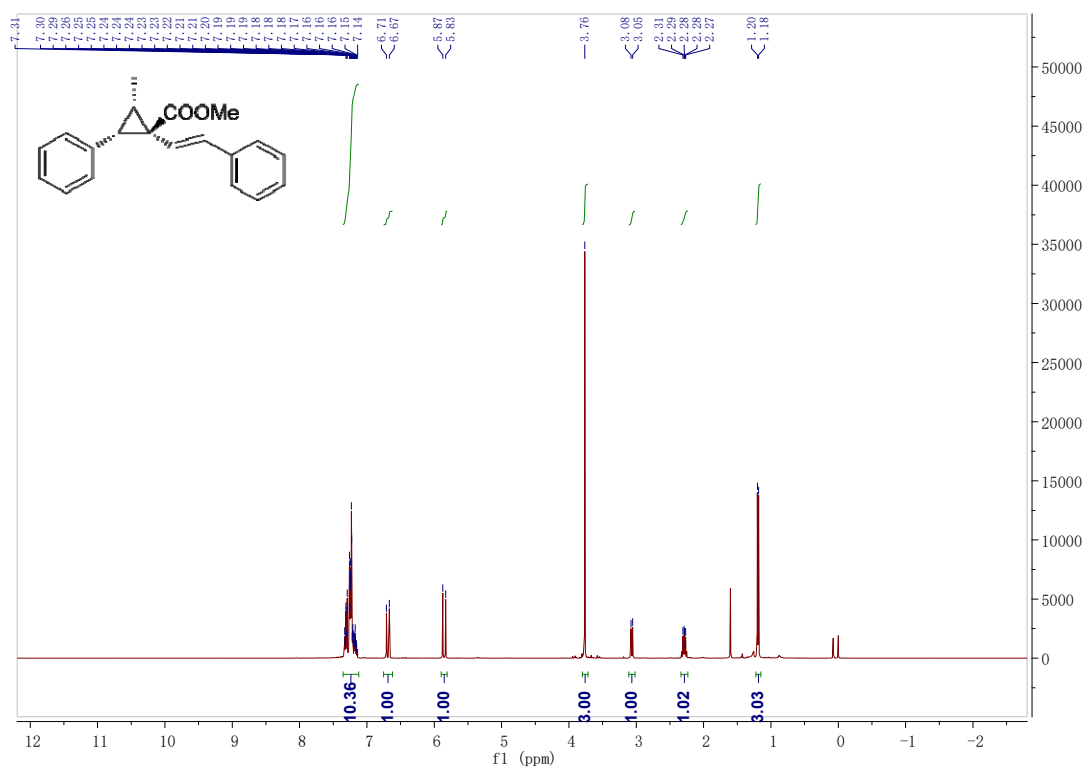

**Figure S59a:** <sup>1</sup>H NMR (400 MHz, CDCl<sub>3</sub>) spectrum of Methyl 2-Methyl-3-phenyl-1-((*E*)-styryl)cyclopropanecarboxylate (2i)

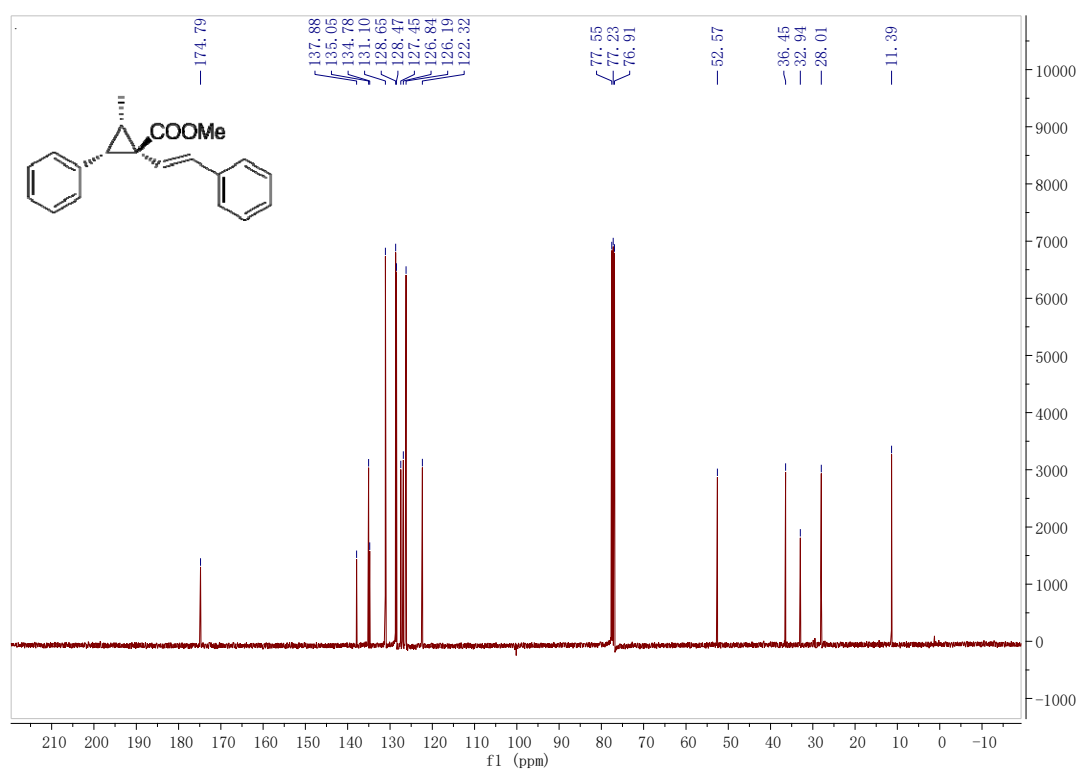

**Figure S59b:** <sup>13</sup>C NMR (100 MHz, CDCl<sub>3</sub>) spectrum of Methyl 2-Methyl-3-phenyl-1-((*E*)-styryl)cyclopropanecarboxylate (2i)

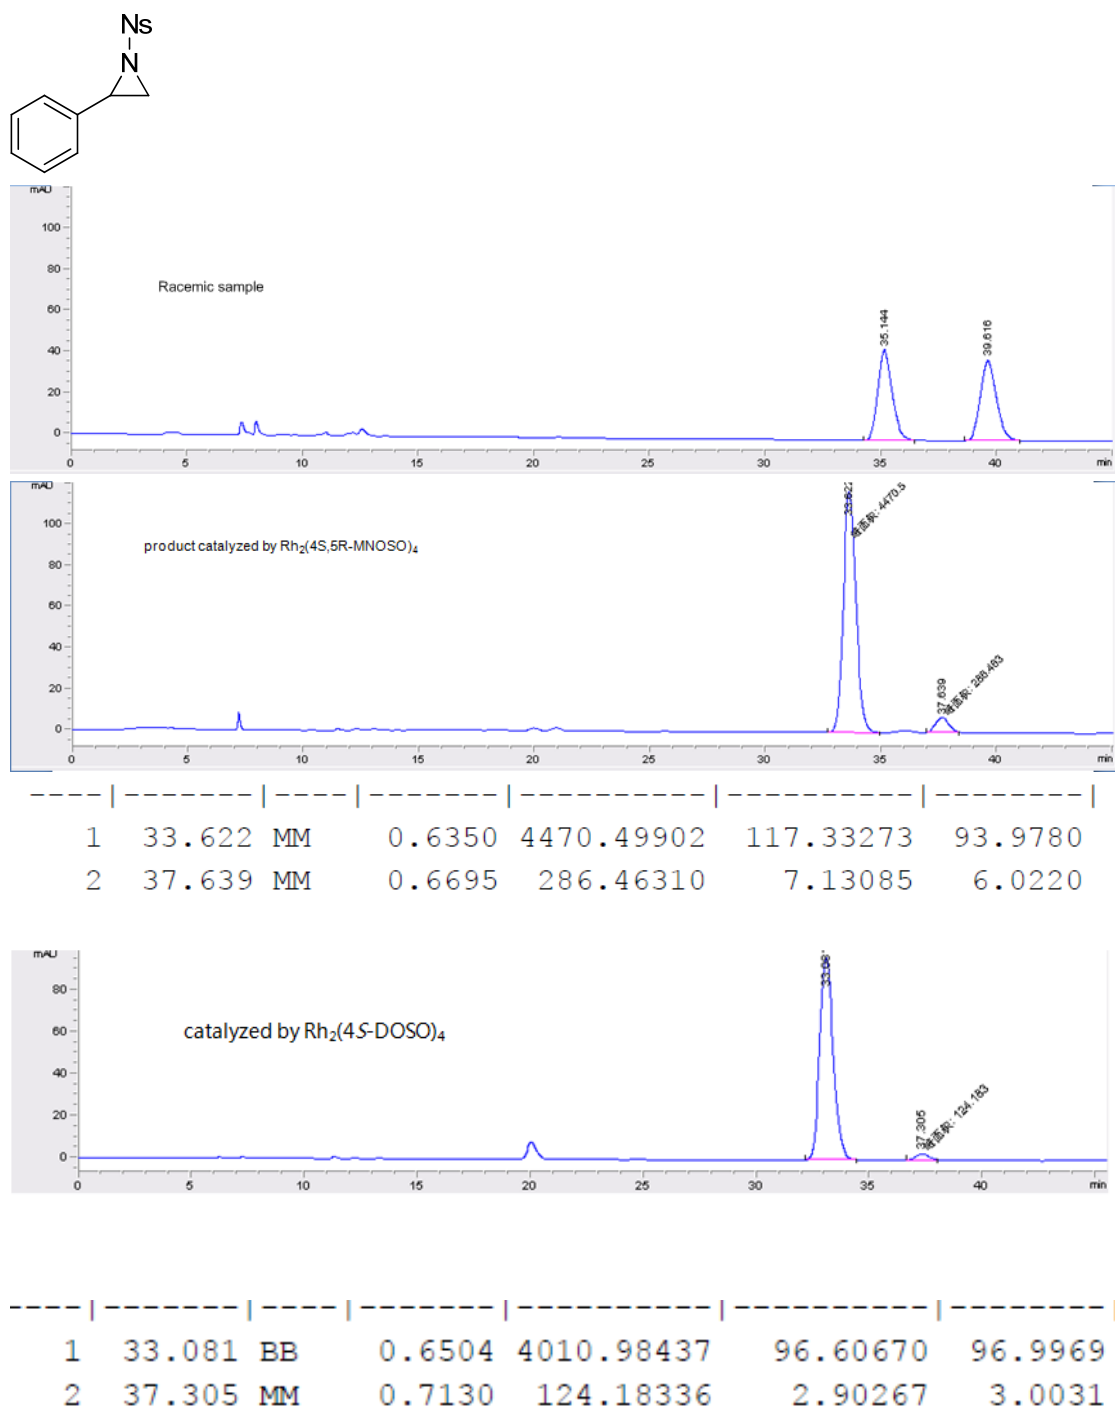

**Figure S60: HPLC Trace of 1-((4-nitrophenyl)sulfonyl)-2-phenylaziridine (1)**

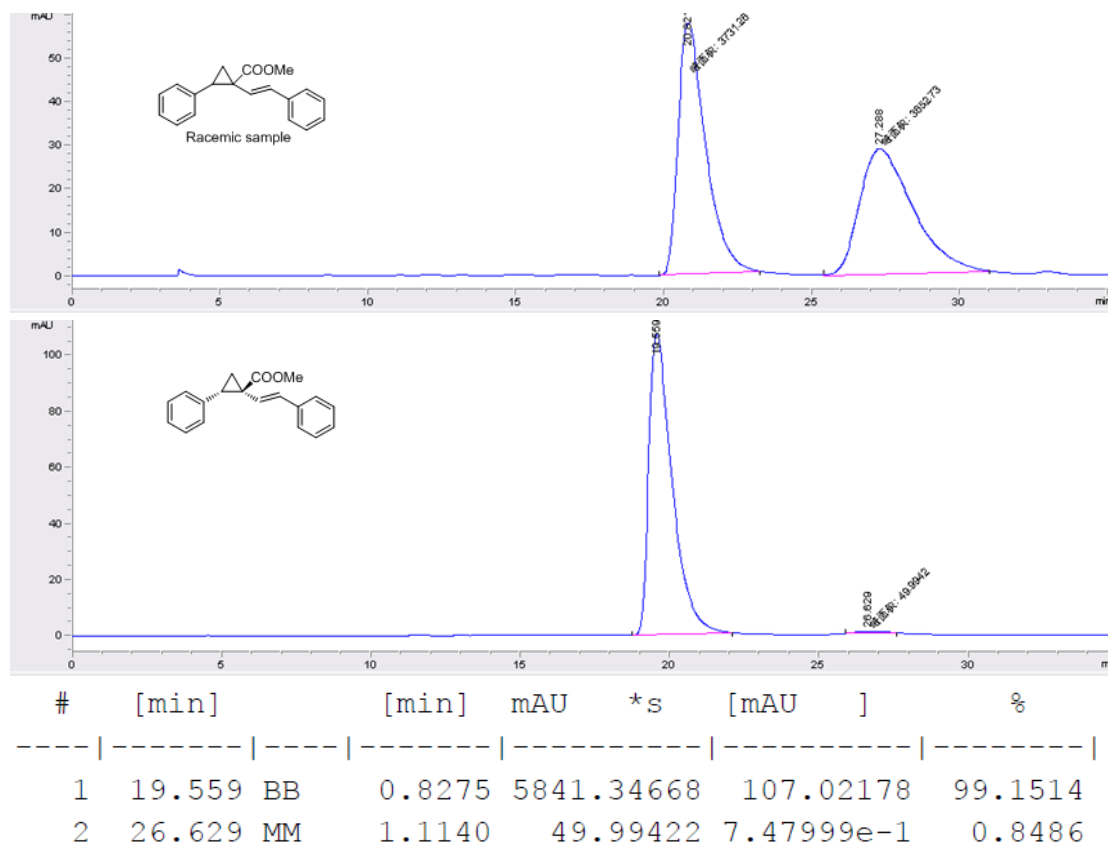

**Figure S61: HPLC Trace of (1S,2S)-Methyl 2-Phenyl-1-((E)-styryl)cyclopropanecarboxylate (2a)**

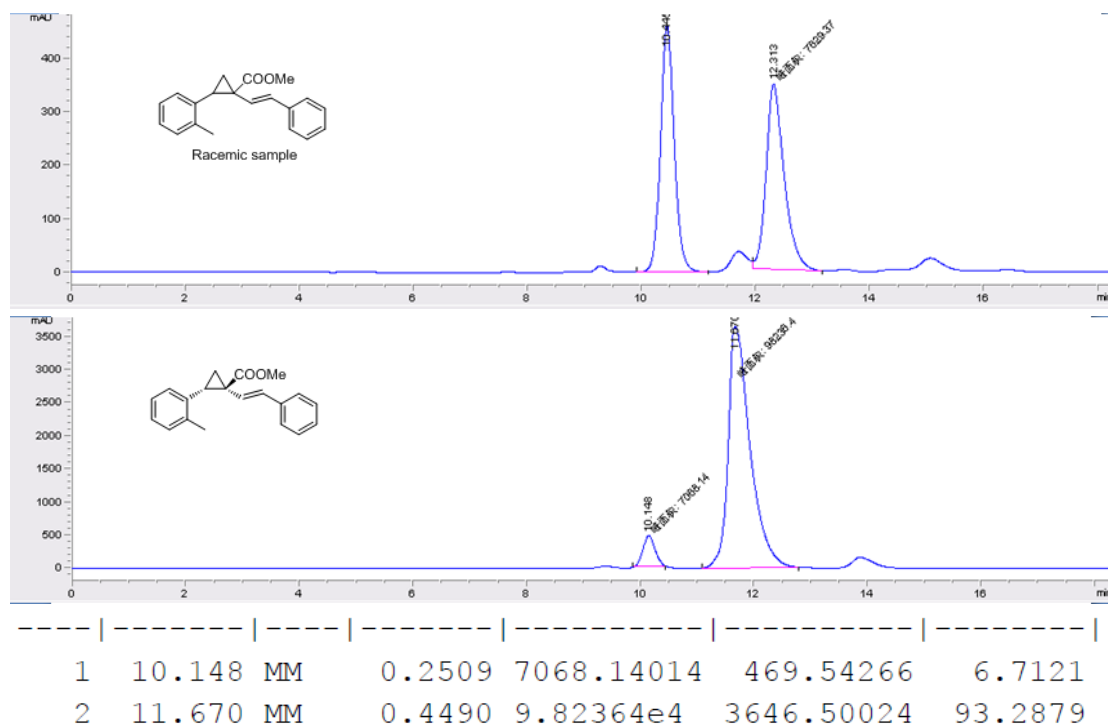

**Figure S62: HPLC Trace of (1S,2S)-Methyl 1-((E)-Styryl)-2-(o-tolyl)cyclopropanecarboxylate (2b)**

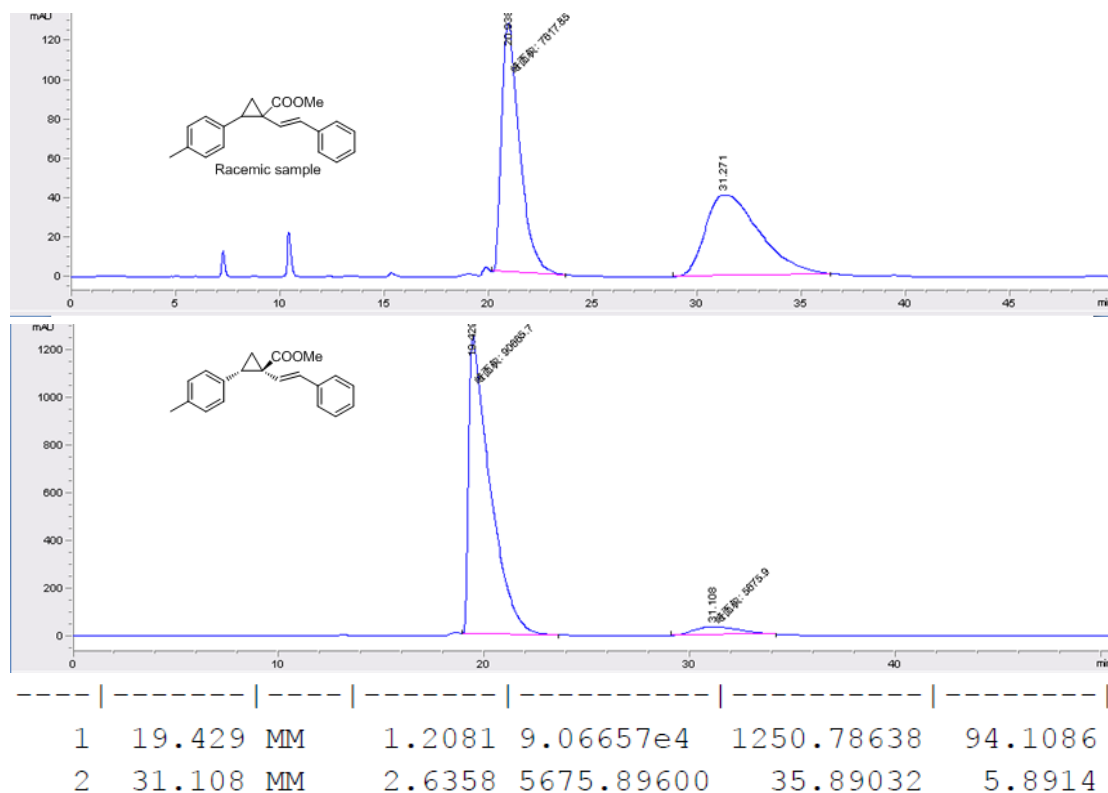

**Figure S63: HPLC Trace of (1S,2S)-Methyl 1-((E)-Styryl)-2-(p-tolyl)cyclopropanecarboxylate (2c)**

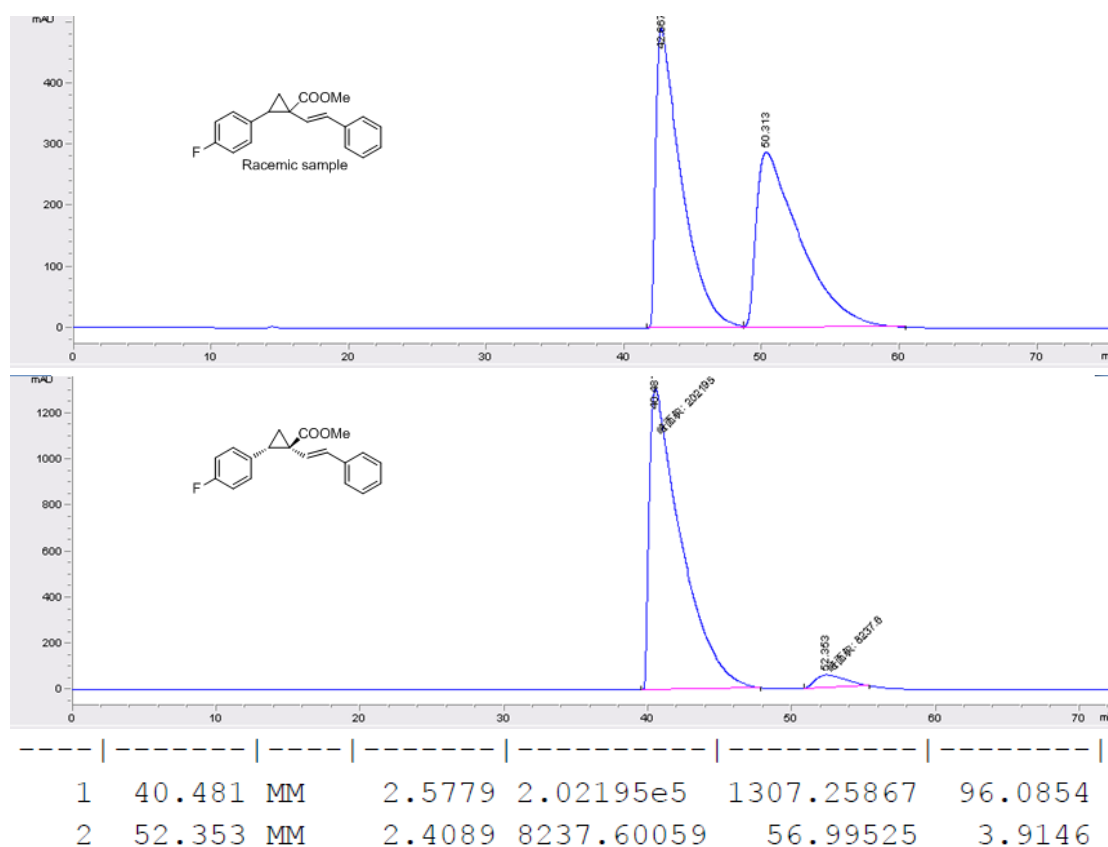

**Figure S64: HPLC Trace of (1S,2S)-Methyl 2-(4-Fluorophenyl)-1-((E)-styryl)cyclopropanecarboxylate (2d)**

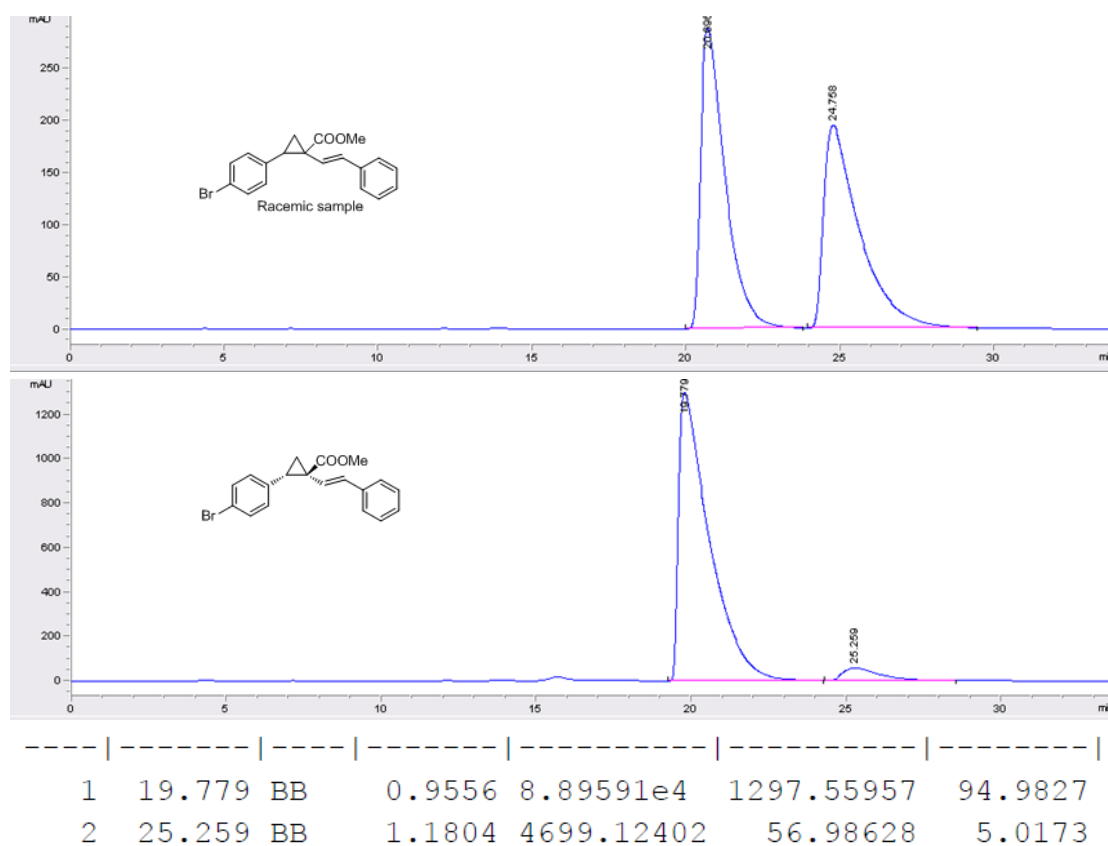

**Figure S65: HPLC Trace of (1S,2S)-Methyl 2-(4-Bromophenyl)-1-((E)-styryl)cyclopropanecarboxylate (2e)**

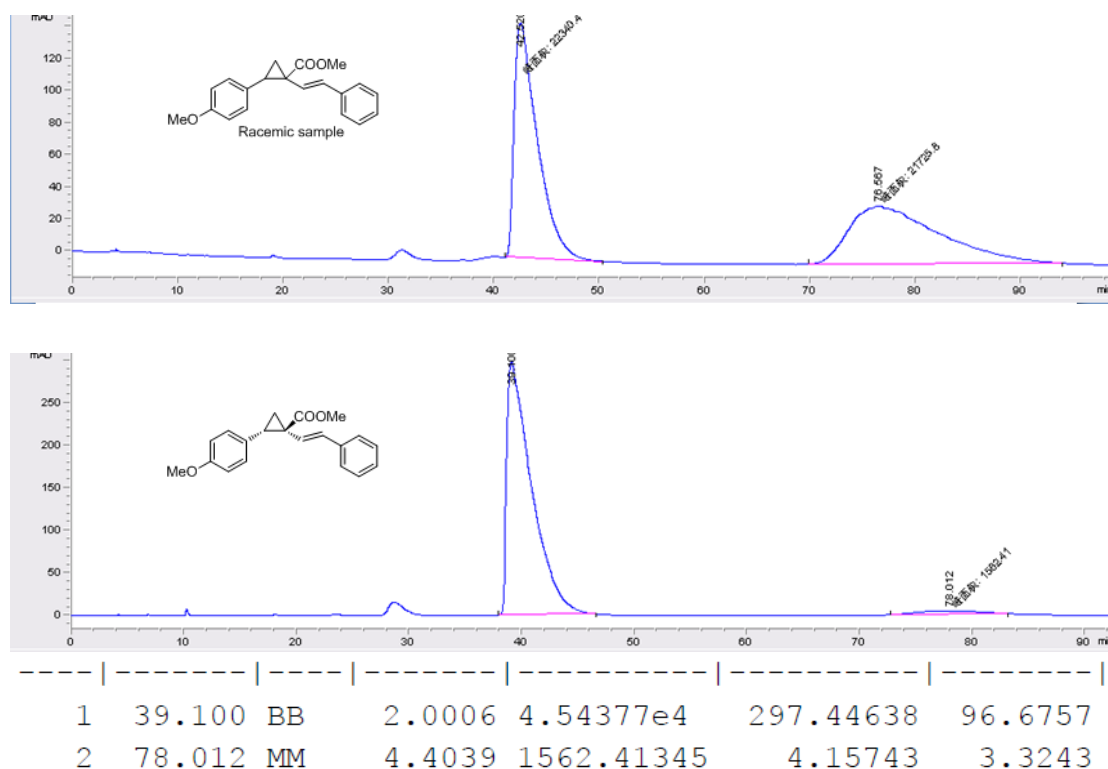

**Figure S66: HPLC Trace of (1S,2S)-Methyl 2-(4-Methoxyphenyl)-1-((E)-styryl)cyclopropanecarboxylate (2f)**

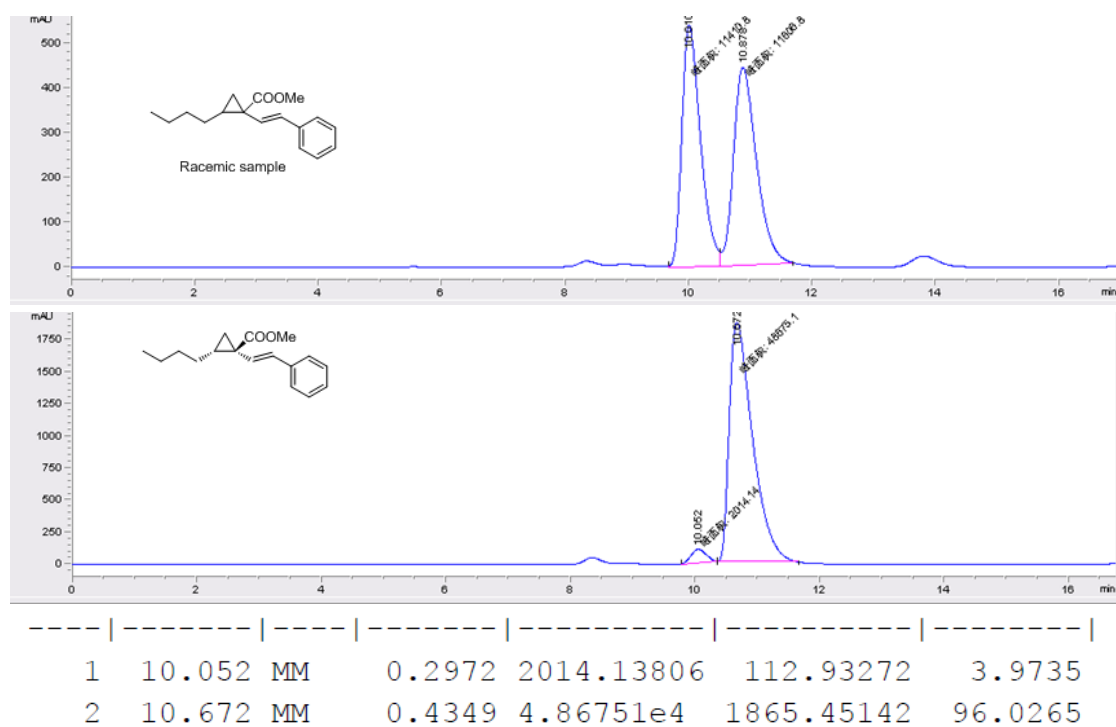

**Figure S67: HPLC Trace of Methyl 2-Butyl-1-((E)-styryl)cyclopropanecarboxylate (2g)**

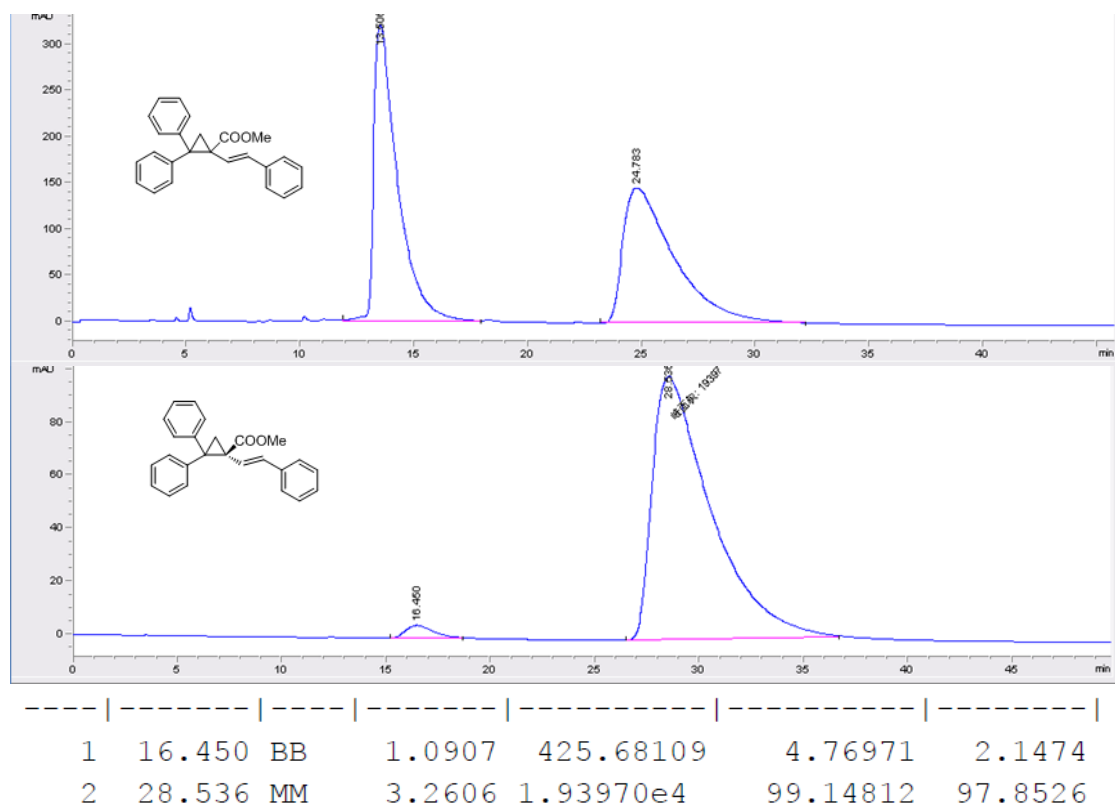

**Figure S68: HPLC Trace of Methyl 2,2-Diphenyl-1-styrylcyclopropanecarboxylate (2h)**

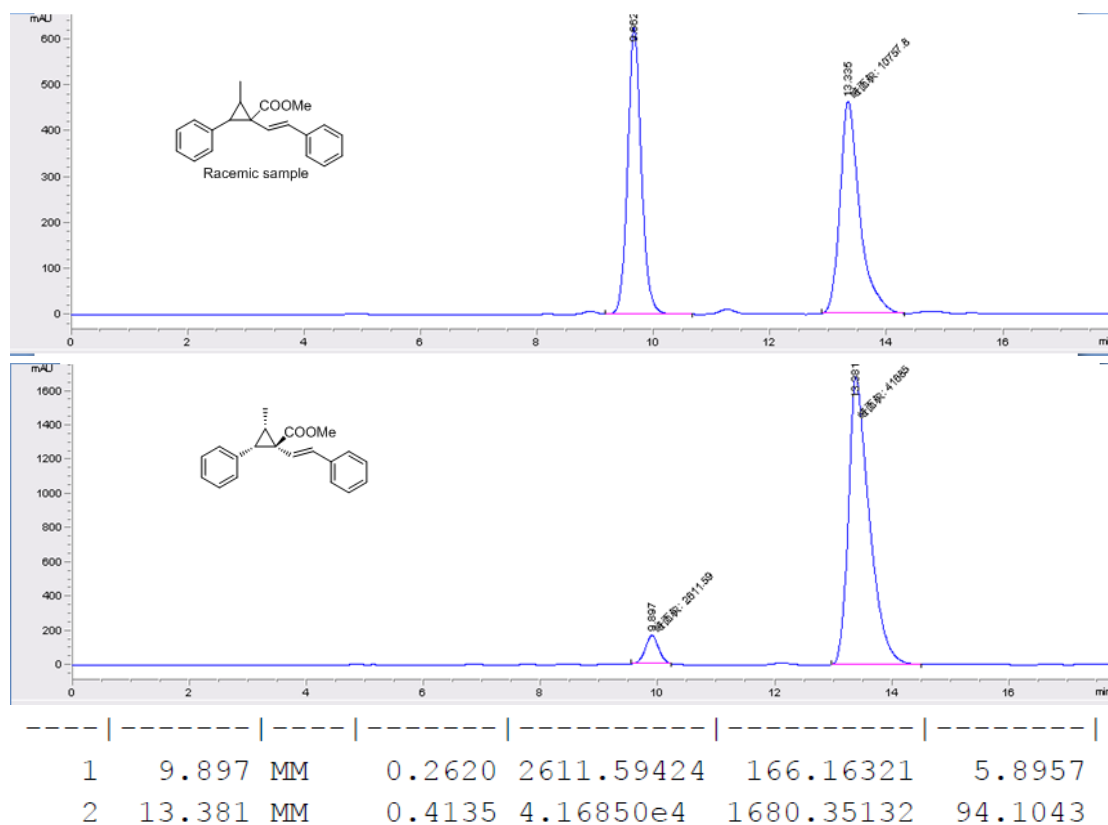

**Figure S69: HPLC Trace of Methyl 2,2-Diphenyl-1-styrylcyclopropanecarboxylate (2i)**

## Crystal structure determination

**Table S1** Crystal data and structure refinement parameters for compounds **4S,5R-MNOSO** and **4R-MOST**.

|                                                      | <b>4S,5R-MNOSO</b>                                              | <b>4R-MOST</b>                                                 |
|------------------------------------------------------|-----------------------------------------------------------------|----------------------------------------------------------------|
| Formula                                              | C <sub>11</sub> H <sub>12</sub> N <sub>2</sub> O <sub>7</sub> S | C <sub>11</sub> H <sub>13</sub> NO <sub>7</sub> S <sub>2</sub> |
| Fw                                                   | 316.29                                                          | 335.34                                                         |
| T/K                                                  | 293                                                             | 299                                                            |
| Crystal system                                       | tetragonal                                                      | orthorhombic                                                   |
| Space group                                          | <i>P</i> 4 <sub>1</sub>                                         | <i>P</i> 2 <sub>1</sub> 2 <sub>1</sub> 2 <sub>1</sub>          |
| <i>a</i> /Å                                          | 15.41418(14)                                                    | 7.82043(19)                                                    |
| <i>b</i> /Å                                          | 15.41418(14)                                                    | 10.2265(3)                                                     |
| <i>c</i> /Å                                          | 5.95145(10)                                                     | 17.4910(4)                                                     |
| $\alpha$ /°                                          | 90.00                                                           | 90.00                                                          |
| $\beta$ /°                                           | 90.00                                                           | 90.00                                                          |
| $\gamma$ /°                                          | 90.00                                                           | 90.00                                                          |
| Volume/Å <sup>3</sup>                                | 1414.04(3)                                                      | 1398.86(6)                                                     |
| <i>Z</i>                                             | 4                                                               | 4                                                              |
| $\rho_{\text{calc}}$ /cm <sup>3</sup>                | 1.471                                                           | 1.592                                                          |
| $\mu$ /mm <sup>-1</sup>                              | 2.387                                                           | 3.785                                                          |
| <i>F</i> (000)                                       | 644.0                                                           | 696.0                                                          |
| Total/Unique                                         | 2557/16150                                                      | 2188/6590                                                      |
| <i>R</i> <sub>int</sub>                              | 0.0462                                                          | 0.0298                                                         |
| Goodness-of-fit on <i>F</i> <sup>2</sup>             | 0.879                                                           | 0.945                                                          |
| <i>RI</i> , <i>wR2</i> [ <i>I</i> ≥ 2σ ( <i>I</i> )] | 0.0353, 0.1052                                                  | 0.0355, 0.1101                                                 |
| <i>RI</i> , <i>wR2</i> [all data]                    | 0.0391, 0.1083                                                  | 0.0375, 0.1128                                                 |
| Flack parameter                                      | -0.03(2)                                                        | 0.01(2)                                                        |

**Table S2** Selected bond lengths (Å) and bond Angles (°) for **4*S*,5*R*-MNOSO** and **4*R*-MOST**.

| <b>4<i>S</i>,5<i>R</i>-MNOSO</b> |          |           |            |
|----------------------------------|----------|-----------|------------|
|                                  | Length/Å |           | Angle/°    |
| S1-O4                            | 1.424(2) | O4-S1-O3  | 121.00(14) |
| S1-O3                            | 1.425(2) | O4-S1-N2  | 106.26(11) |
| S1-N2                            | 1.638(2) | O4-S1-C4  | 107.61(12) |
| S1-C4                            | 1.767(2) | O3-S1-N2  | 105.85(12) |
| O7-C10                           | 1.317(3) | O3-S1-C4  | 107.58(12) |
| O5-C7                            | 1.414(3) | N2-S1-C4  | 107.97(11) |
| O5-C8                            | 1.433(4) | C7-O5-C8  | 104.1(2)   |
| N1-C1                            | 1.483(4) | O2-N1-C1  | 117.4(4)   |
| N1-O2                            | 1.213(5) | O1-N1-C1  | 119.3(4)   |
| N1-O1                            | 1.192(6) | O1-N1-O2  | 123.3(4)   |
| N2-C9                            | 1.469(3) | C9-N2-S1  | 119.88(17) |
| N2-C7                            | 1.469(3) | C7-N2-S1  | 117.59(17) |
| C5-C4                            | 1.393(4) | C7-N2-C9  | 106.8(2)   |
| C5-C6                            | 1.381(4) | C6-C5-C4  | 119.0(3)   |
| C10-C9                           | 1.510(3) | O7-C10-C9 | 110.3(2)   |
| C10-C6                           | 1.210(3) | O6-C10-C9 | 125.3(2)   |
| C9-C8                            | 1.565(4) | N2-C9-C10 | 111.50(19) |
| C4-C3                            | 1.389(4) | N2-C9-C8  | 102.6(2)   |
| C6-C1                            | 1.378(5) | C10-C9-C8 | 111.35(19) |
| C2-C3                            | 1.384(4) | C5-C4-S1  | 120.0(2)   |
| C2-C1                            | 1.380(4) | C3-C4-S1  | 118.06(19) |
| C8-C11                           | 1.512(4) | C3-C4-C5  | 122.0(2)   |

| <b>4<i>R</i>-MOST</b> |          |           |            |
|-----------------------|----------|-----------|------------|
|                       | Length/Å |           | Angle/°    |
| C1-O1                 | 1.425(5) | C3-C2-C7  | 120.3(3)   |
| C9-S2                 | 1.776(3) | O1-C2-C3  | 125.6(3)   |
| C11-O6                | 1.326(4) | O1-C2-C7  | 114.1(3)   |
| C2-O1                 | 1.365(4) | C2-C3-C4  | 119.9(3)   |
| C11-O7                | 1.190(4) | C5-C4-C3  | 119.9(3)   |
| C4-C5                 | 1.381(5) | C4-C5-C6  | 119.8(3)   |
| C5-C6                 | 1.395(5) | C4-C5-S1  | 120.7(3)   |
| C5-S1                 | 1.741(3) | C6-C5-S1  | 119.5(3)   |
| O2-S1                 | 1.429(2) | O7-C11-O6 | 124.9(3)   |
| O4-S2                 | 1.438(3) | C8-N1-C10 | 115.5(2)   |
| O5-S2                 | 1.419(3) | C8-N1-S1  | 118.3(2)   |
| O3-S1                 | 1.417(3) | C10-N1-S1 | 116.8(2)   |
| N1-S1                 | 1.655(2) | O4 S2-C8  | 108.20(16) |
| C8-N1                 | 1.447(4) | O5-S2-C9  | 113.32(18) |
| C8-S2                 | 1.932(6) | O5-S2-O4  | 118.48(18) |
